# Supplementary material for: Sex-based differences in circulating microRNA and metabolite signatures associated with physical activity in Lynch Syndrome carriers
Source: Research Square preprint supplement (doi:10.21203/rs.3.rs-7432623/v1), 2025-09-30

# Supplementary Materials and Methods

## Sex-based differences in circulating microRNA and metabolite signatures associated with physical activity in Lynch Syndrome carriers

### Contents

|                                                                                                                                                                             |    |
|-----------------------------------------------------------------------------------------------------------------------------------------------------------------------------|----|
| 1. Supplementary Methods .....                                                                                                                                              | 2  |
| 1.1 Physical activity data .....                                                                                                                                            | 2  |
| 1.2 MicroRNA extraction .....                                                                                                                                               | 3  |
| 1.3 MicroRNA library preparation .....                                                                                                                                      | 4  |
| 1.4. MicroRNA sequencing .....                                                                                                                                              | 4  |
| 1.5. MicroRNA alignment and filtering .....                                                                                                                                 | 4  |
| 1.6. Metabolomics data .....                                                                                                                                                | 4  |
| 1.7 Omics-level differences between self-reported physical activity groups .....                                                                                            | 5  |
| 1.8 Circulating microRNA and metabolite co-expression module correlations with physical activity levels .....                                                               | 5  |
| 1.9 Circulating microRNA gene enrichment and pathway analyses .....                                                                                                         | 5  |
| 1.10 miRNATissueAtlas analysis to explore physical activity-associated circulating microRNA source tissues .....                                                            | 6  |
| 1.11 Regularized canonical correlation analysis (rCCA) .....                                                                                                                | 6  |
| 1.12 Acute exercise intervention, serum sample collection and RT-qPCR analysis .....                                                                                        | 6  |
| 1.13 R scripts .....                                                                                                                                                        | 7  |
| 1.14 Phenodata .....                                                                                                                                                        | 7  |
| 1.15 Additional files .....                                                                                                                                                 | 7  |
| 2. Supplementary Tables .....                                                                                                                                               | 8  |
| Supplementary Table 1. Sequencing coverage and quality statistics of each sample. ....                                                                                      | 8  |
| Supplementary Table 2. False discovery rate correction of module-METd correlation significance. ....                                                                        | 11 |
| Supplementary Table 3. Correlation of physical-activity-associated co-expression modules and BMI, age and previous cancer history. ....                                     | 12 |
| Supplementary Table 4. Results of the structural equation model (SEM) examining associations between physical activity, diet, BMI, and circulating microRNA modules. ....   | 13 |
| Supplementary Table 5. Results of the structural equation model (SEM) examining associations between physical activity, diet, BMI, and circulating metabolite modules. .... | 13 |
| Supplementary Table 6. Cancer over-representation analysis of physical activity-associated c-miRNAs. ....                                                                   | 14 |
| Supplementary Table 7. Physical activity-associated miRNA gene chromosome locus. ....                                                                                       | 23 |
| 3. Supplementary Figures .....                                                                                                                                              | 25 |
| Supplementary Fig. 1. Selection of soft-thresholding power for weighted gene co-expression network analysis (WGCNA) .....                                                   | 25 |
| Supplementary Fig. 2. Differences in circulating microRNA profiles between self-reported physical activity (SR-PA) groups .....                                             | 26 |
| Supplementary Fig. 3. Associations between physical activity and circulating microRNA module eigengenes (ME), stratified by sex .....                                       | 27 |
| Supplementary Fig. 4. Associations between physical activity and circulating metabolite module eigengenes (ME), stratified by sex .....                                     | 28 |
| Supplementary Fig. 5. Reactome pathway enrichment of microRNAs .....                                                                                                        | 29 |

### Contact information:

Minta Kärkkäinen: [minta.e.m.karkkainen@jyu.fi](mailto:minta.e.m.karkkainen@jyu.fi)

Tiina Jokela: [tiina.a.jokela@jyu.fi](mailto:tiina.a.jokela@jyu.fi) (author of correspondence)

# 1. Supplementary Methods

## 1.1 Physical activity data

Daily physical activity was quantified as the metabolic equivalent of tasks per day (METd), combining leisure-time and commuting exercise, based on responses to four questions (Q1-4 listed below). In addition, self-reported physical activity level (SR-PA) was determined from a separate 7-point scale question (Q5).

METd values were missing for two participants and were imputed using the *mice* package in R. The imputation included relevant auxiliary variables: age, SR\_PA, sex, body mass index (BMI), and a combined binary variable for previous cancer/upcoming cancer status. The study participants with either a previous cancer history or cancer that occurred after blood sampling were categorized as 1, and those with no previous or future cancer history were categorized as 0. Imputation was conducted using predictive mean matching (method = "pmm") with five imputed datasets (m = 5).

METd was calculated by summarizing equations 1 and 2:

Equation 1

$$\text{leisure time exercise MET} - \text{h/day} = \frac{(Q1 \times Q2 \times Q3) \div 60}{30}, \quad (1)$$

where Q1=leisure time exercise sessions per month; coding (1=0.5) (2=1.5) (3=4) (4=8) (5=15) (6=25),  
Q2=the strain of leisure time exercise; coding (1=4) (2=6) (3=10) (4=13),  
Q3=the duration of one exercise session; coding (1=7) (2=22) (3=45) (4=90) (5=150).

Equation 2

$$\text{commuting or school commuting exercise MET} - \text{h/day} = \frac{((Q4) \times 5 \times 4) \div 60}{7}, \quad (2)$$

where Q35=duration of commuting (including school trips); coding (1=0) (2=7) (3=22) (4=45) (5=75).  
0 MET for participants who had not answered any of the questions but had indicated in the previous question that they don't exercise. Commuter exercise assumes walking = 4 MET.

Equation 3

$$\text{Total METd} = \text{Leisure time METh/day} + \text{Commuting METh/day} \quad (3)$$

### 7-scale self-reported physical activity question (SR-PA):

SR-PA was derived from a 7-scale question (Q5) on current activity level. Responses were recoded into three categories as follows: Q5 coding: (1–2 = low), (3–4 = intermediate), (5–7 = high)

The questions used to scale physical activity level:

#### Q1. How many times per month do you currently engage in leisure-time physical activity?

- ☐ 1. Less than once a month
- ☐ 2. 1–2 times a month
- ☐ 3. 3–5 times a month
- ☐ 4. 6–10 times a month
- ☐ 5. 11–19 times a month
- ☐ 6. More than 20 times a month

**Q2. The leisure-time physical activity you engage in is generally about as strenuous as:**

- ☐ 1. Walking
- ☐ 2. Alternating walking and light jogging
- ☐ 3. Light jogging (jog)
- ☐ 4. Brisk running

**Q3. On average, how long does one session of your leisure-time physical activity last?**

- ☐ 1. Less than 15 minutes
- ☐ 2. 15 minutes – less than half an hour
- ☐ 3. Half an hour – less than one hour
- ☐ 4. One hour – less than two hours
- ☐ 5. Two hours or more

**Q4. How much time do you spend daily commuting to work or school by walking, cycling, running, skiing, rollerblading, and/or other forms of active transportation?**

- ☐ 1. Not at all
- ☐ 2. Less than 15 minutes
- ☐ 3. 15 minutes – less than half an hour
- ☐ 4. Half an hour – less than one hour
- ☐ 5. One hour or more

**Q5. Which of the following descriptions best matches your current physical activity level?**

*(select only one option)*

- ☐ 1. I do not exercise more than is necessary to manage daily activities
- ☐ 2. I do light walking and outdoor activities 1–2 times per week
- ☐ 3. I do light walking and outdoor activities several times per week
- ☐ 4. I do moderate exercise (e.g., yard work, walking, cycling) 1–2 times per week, which causes some shortness of breath and sweating
- ☐ 5. I do moderate exercise (e.g., yard work, walking, cycling) several times per week (3–5 times), which causes some shortness of breath and sweating
- ☐ 6. I do fitness training several times per week so that I sweat and breathe heavily during the activity
- ☐ 7. I participate in competitive sports and maintain my fitness through regular training

## 1.2 MicroRNA extraction

MicroRNA extractions from serum were done using the miRNeasy Serum/Plasma Advanced Kit (217204, Qiagen) by following the kit instructions. Briefly, the extraction of microRNAs was done using 0.5 mL of thawed serum. Samples were thawed on ice. The solutions needed for the isolation were provided in the kit and were added in amounts recommended by the manufacturer. To elute the isolated RNA, 20 µl of nuclease-free water was used and the samples were stored at -80 °C until library preparation.

### 1.3 MicroRNA library preparation

Small RNA library preparations were conducted using the QIAseq miRNA Library Preparation Kit (1103679, Qiagen) with multiplexing adapters, following the manufacturer's instructions. In summary, 5 µL of small RNAs were ligated to sequencing adapters at both the 5' and 3' ends, reverse transcribed into cDNA using UMI-assigning primers and purified with magnetic beads. A universal indexing sequence was incorporated during the reverse transcription step to differentiate samples during sequencing. Sample amplification was performed using a standard thermocycler (Eppendorf), after which it was purified, eluted into 15 µL of nuclease-free water, and stored at -20 °C until sequencing.

### 1.4. MicroRNA sequencing

The microRNA library sequencing was conducted on 5 separate analysis batches utilizing NextSeq 500 (Illumina) and NextSeq 500/550 High Output Kit v. 2.5 with 75 cycles (15057934, Illumina) to produce 75-base pair single-end reads with aimed mean sequencing depth of >5 M reads per sample as recommended by the manufacturer (Qiagen). The library sample concentrations were measured with a Qubit fluorometer (Invitrogen), quantified, diluted, and mixed into one pool in equal amounts (1.8-2 pM per sample) prior to sequencing.

### 1.5. MicroRNA alignment and filtering

Sequencing output data was obtained in FASTQ format using bcl2fastq software (v.2.20, Illumina, USA). FastQC was used for quality control. Before alignment, all four sample lanes (the sequencing produced 4 lanes for each sample) were merged to obtain the overall sample read count and to ensure better mapping quality. The QIAseq sequencing adapters were removed from the 3' end of the reads with FastX toolkit. Only sequences that contained the adapter and were at least 20 bp long after adapter removal were kept. After adapter clipping, the sequences were trimmed to maximum length of 22 bp to enrich microRNA-sequences and then quality filtered with FastX-toolkit. Only high-quality reads (Phred score >25) were selected for alignment to the reference genome. Subsequently, the pre-processed reads were mapped to human mature miRNA-genome (miRbase v.22) with Bowtie alignment tool. The mean raw read count of the experiments was 4,922,756 M reads for each sample, and after adapter removal, trimming, and filtering of low-quality data, the mean clean read count was 1,754,716 M counts per sample. On average, 1,163,087 M clean counts per sample were mapped to human miRNAs, achieving a mean alignment rate of 64 %. The remaining unmapped sequences represent clean read counts of other short RNAs, as the miRNeasy Serum/Plasma Advanced Kit extracts all short RNA molecules. The sequencing produced 1468 distinct microRNAs within the study cohort. The microRNA sequencing data generated in this study is available in NCBI Sequence Read Archive under bioproject PRJNA1275648. The microRNAs with low expression (<1 count per million in 50% of samples) were filtered, leaving 334 microRNAs for the main analyses. After normalization and accounting for the potential batch effect, the 334 microRNAs were used in the downstream analyses. The main manuscript describes the normalization procedure in the Materials and Methods section.

### 1.6. Metabolomics data

The metabolomics analyses were conducted on behalf of Nightingale Health Ltd. The serum samples were stored at -80 °C until analysis. Briefly, the metabolites were analyzed using a targeted proton nuclear magnetic resonance (<sup>1</sup>H-NMR) spectroscopy platform (Nightingale Health Ltd., Helsinki, Finland). The high-throughput <sup>1</sup>H-NMR platform identifies small-molecule solutes from 300 µL of blood serum, such as distinct amino acids and glycolysis substrates, utilizing spectroscopic settings optimized to reduce interference from the broad spectral signals of lipoprotein particles. Additionally, the quantification of lipid constituents and the assessment of the spectrum of fatty acid saturation levels were performed using serum lipid extracts.

For the NMR measurements, 300 µL of serum and 300 µL of a sodium phosphate buffer (75 mM Na<sub>2</sub>HPO<sub>4</sub> in 80%/20% H<sub>2</sub>O/D<sub>2</sub>O, pH 7.4; including also 0.08% sodium 3-(trimethylsilyl)propionate-2,2,3,3-d<sub>4</sub> and 0.04% sodium azide) are mixed and transferred to the NMR tubes. The liquid handling steps of the serum samples are conducted using a PerkinElmer JANUS Automated Workstation equipped with an 8-tip dispense arm with Varispan. Nightingale's NMR metabolomics analyses use the Bruker AVANCE III 500 MHz spectrometers with the SampleJet robotic sample changer. The 500 MHz spectrometer is equipped with a selective inverse room temperature probe head. Nightingale uses standardized parameters for data acquisition. After the measurements, the samples are handled with a standardized lipid extraction procedure containing multiple extraction steps including saturated sodium chloride solution, methanol, dichloromethane, and

deuteriochloroform. The lipid extracts are transferred into the NMR tubes and the extracted lipid (LIPID) data are collected in full automation with the 600 MHz instrument using a standard parameter set. The initial data processing, including Fourier transformations of NMR spectra and automated phasing, is carried out by the computers controlling the spectrometers. The processed spectra are then automatically transferred to a centralized server, where additional automated steps take place, such as checking for missing or extra peaks, background control, baseline correction, and spectral alignment for specific regions. The spectral data of each sample is also compared against two quality control samples, with their data being tracked and assessed over time. Regression modeling is applied to spectral regions that pass all quality control checks to generate quantified molecular data. Additionally, individual metabolic measures undergo statistical quality control and are cross-checked against a comprehensive molecular database. Only the metabolic measures that successfully meet all quality criteria are stored and made available for epidemiological analyses. The in-detail technicalities of the method have been reported previously by Soininen et al. (<https://pubs.rsc.org/en/content/articlelanding/2009/an/b910205a>). A description of the NMR instrument models and the experimental workflow used by Nightingale Health can be found in this publication (including the supplementary material): <https://pubmed.ncbi.nlm.nih.gov/36737450/>.

### 1.7 Omics-level differences between self-reported physical activity groups

Principal Coordinates Analysis (PCoA), utilizing the base stats package in R, was used to explore and visualize circulating microRNA and circulating metabolite-level similarities or dissimilarities between SR-PA groups. The distance matrix was determined using Manhattan distances to assign a location for each study subject in low-dimensional space. The PCoA coordinates were visualized using a scatter plot. Permutational Analysis of Variance (PERMANOVA) was used to test whether the centroids and dispersion of the PCoA matrix differed between groups, while Analysis of Similarities (ANOSIM) was applied to assess whether within-group similarity exceeded that between groups. Both statistical tests were conducted using the *vegan* R package.

### 1.8 Circulating microRNA and metabolite co-expression module correlations with physical activity levels

Weighted Correlation Network Analysis (WGCNA), utilizing the R package WGCNA, was used to investigate how clustered circulating microRNAs and clustered circulating metabolites correlate with METd levels. A gene expression similarity matrix was first computed and transformed into an adjacency matrix using a soft-thresholding power of 7 for microRNAs, and 20 for metabolites (Supplementary Figure S1) to approximate scale-free topology. The adjacency matrix was then converted into a topological overlap matrix (TOM), capturing both direct and indirect gene interactions. Hierarchical clustering was applied to the TOM to identify modules with high co-expression. Each module was summarized by its eigengene (ME), defined as the first principal component of the expression or level profiles within that module. Relationships with METd were assessed using biweighted midcorrelation, with significance determined by p-values and FDR correction using the Benjamini-Hochberg (BH) procedure. Additionally, module-BMI and module-age correlations were calculated using biweighted midcorrelation and module-previous cancer history correlations using Pearson correlation. Heatmaps, scatter plots (with robust regression lines), and boxplots were used to visualize the key findings. The structural equation modeling (SEM), using the R lavaan package, was used to study whether METd, daily energy intake (kJ) or fat consumption (g/d) have indirect effects on module levels via BMI.

The circulating microRNAs and metabolites from WGCNA modules that exhibited the strongest correlations with METd were further analyzed. Biweighted midcorrelation analyses were performed separately between each PA-associated c-miRNAs or c-Metabs and METd values. The FDR was controlled using the BH procedure. Only microRNAs and metabolites with FDR <0.05 were selected for further analysis to examine their interrelationships.

### 1.9 Circulating microRNA gene enrichment and pathway analyses

To study whether physical activity-level-associated module microRNAs are overrepresented in cancer, we used miEAA's Over-representation analysis (ORA) -tool. The MNDR Diseases (subcategory cancer) with adj. p-value <0.05 were deemed over-represented in cancer. We also explored the potential biological roles of physical-activity-associated module microRNAs using miRWalk for target gene predictions, focusing on 3' UTR targets. Only genes confirmed by TargetScan, miRDB, and miRTarBase were retained for gene set enrichment analysis (GSEA). KEGG pathway enrichment was analyzed, with significance defined by BH adjusted p-values  $\leq 0.05$ .

### 1.10 miRNA TissueAtlas analysis to explore physical activity-associated circulating microRNA source tissues

Expression data (version 3) and associated metadata were downloaded from the miRNA TissueAtlas 2025 database. Expression levels of selected miRNAs across various human tissues were visualized using strip plots. For each miRNA, expression values were log-transformed and plotted by tissue group, with sample sex indicated by color. Plots were generated using Python libraries matplotlib and seaborn.

### 1.11 Regularized canonical correlation analysis (rCCA)

Canonical correlation analysis (CCA), using R package miXOmics, was applied to evaluate the correlation structure between the two omics layers: circulating microRNAs and metabolites, which had significant correlations with METd. To reduce the dimensionality of the data and maximize the correlation between the two datasets, regularized CCA (rCCA) was performed using ridge regression as the regularization method. To explore potential sex-based differences in the relationships between microRNAs and metabolites, the data were split by sex. Separate analyses were performed for females and males by determining appropriate regulation parameters for both groups. The results of the rCCA were visualized using a clustered heatmap.

### 1.12 Acute exercise intervention, serum sample collection and RT-qPCR analysis

As acute exercise pout, 11 cancer-free LS carriers from Finland (8 females and 3 males) conducted a validated submaximal bicycle ergometer test (Beekley MD, et. al. (2004) ([Cross-Validation of the YMCA Submaximal Cycle Ergometer Test to Predict VO2max](#)) during February-June of 2025 (AgeCanLS project). The age range of the participants was 42-71. The study participant pedalled on the cycle ergometer for 3 minutes at a resistance of 0 kg and a cadence of 50-55 (this is the warm-up). As a first stage of the test, the participant pedalled for 3 minutes at 25 W, 50-55 cadence (150 kgm/min =0.5 kg). The heart rate was recorded at 2 minutes and 3 minutes. If the heart rate values were not within 5 bpm, cycling was continued for another minute and recorded at 4 minutes. Based on the steady-state heart rate (HR) reached, the workload was increased for the second stage based on the details listed in the Table below (note: 6 kgm/min = 1 Watt). The test included 4 stages, each lasting for 3 minutes. If the participant did not reach 85% of age-predicted HR, cycling continued to additional 5<sup>th</sup> stage. After the test phase, the theoretical maximum workload was calculated and cycling continued for 10 minutes at 50% of the theoretical maximum workload.

**Workloads**

|                                                       | HR<80 | HR 80-89 | HR90-100 | HR>100 |
|-------------------------------------------------------|-------|----------|----------|--------|
| 2nd stage                                             | 125 W | 100 W    | 75 W     | 50 W   |
| 3rd stage                                             | 150 W | 125 W    | 100 W    | 75 W   |
| 4th stage                                             | 175 W | 150 W    | 125 W    | 100 W  |
| (5th stage)                                           | 200 W | 175 W    | 150 W    | 125 W  |
| 10 min end cycling (50 % of theoretical max workload) |       |          |          |        |

The blood samples were collected at baseline (timepoint a), immediately after exercise (timepoint b) and 1h post-exercise (timepoint c). Venous blood samples from all participants were drawn from the antecubital vein using 9 ml KE2 K2EDTA tubes (455 045, Greiner Bio-One). Serum was separated from whole blood by allowing the samples to clot for 30 min at room temperature, followed by centrifugation at 1800 x g for 10 min. The samples were aliquoted and stored at -80°C until analysis. The small RNAs were extracted from serum samples following the same protocol described under the heading: 1.2 MicroRNA extraction, and stored at -80°C. The samples were reverse transcribed as cDNA using Qiagen's miRCURY LNA RT Kit (339340) according to the manufacturer's instructions. Briefly, the reverse transcription master mix was prepared on ice, and 7 µL of RNA sample was mixed with 3 µL of master mix by carefully pipetting. The samples were incubated for 60 min at 42°C following 5 min at 95°C to inactivate the Reverse Transcriptase Enzyme and immediately cooled to 4°C using a standard thermocycler (Eppendorf). The reverse transcription reactions were stored at -20°C until qPCR.

The qPCR was conducted using Qiagen's miRCURY LNA™ Green PCR Kit (339346). Briefly, a reaction mix for each miRCURY LNA miRNA PCR Assay primer (339306 ) (*hsa-miR-885-3p*: YP00204136; *hsa-miR-483-5p*: YP00205693; *hsa-miR-374a-5p*: YP00204758; *hsa-miR-301a-3p*: YP00205601; and *cel-miR-39-3p* spike-in control: YP00203952) was prepared on ice according to the manufacturer's instructions. 3 µL of cDNA 1:10 dilution was added to 7 µL of master mix and carefully

mixed by pipetting. The samples were incubated 2 min at 95 °C, followed by 40 cycles in conditions: 10 s at 95 °C and 60 s at 56 °C using Cielo Thermal Cycler or BioRad's C1000 Touch Thermal Cycler. Delta Cq values were calculated by Cq (reference) – Cq (target), where Cq(reference) was calculated as the average Cq of all miRNAs at baseline (Pre-exercise). Line plots were used to visualize the changes in miRNA expression over time.

### 1.13 R scripts

All R scripts used for computational analyses are publicly available at:

[https://github.com/karkmieee/Lynch\\_syndrome\\_PA\\_omics/tree/main](https://github.com/karkmieee/Lynch_syndrome_PA_omics/tree/main)

### 1.14 Phenodata

By ethical standards and to protect the privacy of study participants, the phenotypic data (e.g., age, BMI, physical activity data, cancer history, and related information) used in the statistical analyses cannot be made publicly available. The data supporting the findings of this study are available from the corresponding author upon request.

### 1.15 Additional files

Large supplementary Excel tables are provided in a separate file titled *Additional\_tables.xlsx*. Other supplementary tables, along with Supplementary Figures, are included in this *Supplementary Materials & Methods* file under the sections titled *Supplementary Tables* and *Supplementary Figures*.

## 2. Supplementary Tables

**Supplementary Table 1.** Sequencing coverage and quality statistics of each sample. MicroRNAs were mapped to human mature miRNA-genome (miRbase v.22). On average, 1,163,087 M clean counts per sample were mapped to human miRNAs, achieving a mean alignment rate of 64 %. The remaining unmapped sequences represent clean read counts of other short RNAs, as the miRNeasy Serum/Plasma Advanced Kit extracts all short RNA molecules. The sequencing produced 1468 distinct microRNAs within the study cohort.

| Sample ID | Total number of sequenced reads | Total number of clean sequenced reads | Total number of uniquely mapped microRNA aligned sequence reads | MicroRNA alignment % | NGS experiment number |
|-----------|---------------------------------|---------------------------------------|-----------------------------------------------------------------|----------------------|-----------------------|
| 1         | 3740680                         | 2657405                               | 1727579                                                         | 65,0                 | 1                     |
| 2         | 3639260                         | 2213072                               | 1194616                                                         | 54,0                 | 1                     |
| 3         | 4261298                         | 2682312                               | 1551717                                                         | 57,9                 | 1                     |
| 4         | 2222496                         | 850701                                | 226457                                                          | 26,6                 | 1                     |
| 5         | 4871359                         | 1147725                               | 697587                                                          | 60,8                 | 3                     |
| 6         | 2502302                         | 1565709                               | 1026949                                                         | 65,6                 | 1                     |
| 7         | 1585020                         | 845814                                | 553670                                                          | 65,5                 | 2                     |
| 8         | 9129525                         | 3059302                               | 2180388                                                         | 71,27                | 5                     |
| 9         | 4913957                         | 263584                                | 148240                                                          | 56,2                 | 2                     |
| 10        | 5109876                         | 1247341                               | 835469                                                          | 67,0                 | 2                     |
| 11        | 8154146                         | 909515                                | 476959                                                          | 52,44                | 5                     |
| 12        | 4071039                         | 1122018                               | 760504                                                          | 67,8                 | 2                     |
| 13        | 3879327                         | 188662                                | 760504                                                          | 67,8                 | 2                     |
| 14        | 3714238                         | 1272472                               | 835251                                                          | 65,6                 | 3                     |
| 15        | 8955546                         | 3838576                               | 3153755                                                         | 82,16                | 5                     |
| 16        | 3144129                         | 1173055                               | 758497                                                          | 64,7                 | 3                     |
| 17        | 2434188                         | 1578987                               | 828652                                                          | 52,5                 | 1                     |
| 18        | 3022779                         | 1922110                               | 1163069                                                         | 60,5                 | 1                     |
| 19        | 1557905                         | 977090                                | 558798                                                          | 57,2                 | 1                     |
| 20        | 5124394                         | 2107865                               | 1297391                                                         | 61,6                 | 2                     |
| 21        | 7449211                         | 2903457                               | 1407104                                                         | 48,46                | 5                     |
| 22        | 1023146                         | 334823                                | 264778                                                          | 79,1                 | 3                     |
| 23        | 2256265                         | 927431                                | 300580                                                          | 32,4                 | 1                     |
| 24        | 4126351                         | 1624267                               | 1104502                                                         | 68,0                 | 1                     |
| 25        | 4491075                         | 2188813                               | 1088278                                                         | 49,7                 | 1                     |



|    |         |         |         |       |   |
|----|---------|---------|---------|-------|---|
| 26 | 3806260 | 2609133 | 2233157 | 85,6  | 1 |
| 27 | 2212775 | 948741  | 243067  | 25,6  | 1 |
| 28 | 2595748 | 878742  | 463624  | 52,8  | 1 |
| 29 | 2758630 | 1095736 | 666755  | 60,9  | 1 |
| 30 | 7907793 | 263100  | 137028  | 52,08 | 5 |
| 31 | 6335293 | 2355244 | 1310220 | 55,6  | 4 |
| 32 | 6045407 | 867915  | 421479  | 48,56 | 5 |
| 33 | 8147271 | 993739  | 587884  | 59,16 | 5 |
| 34 | 9127129 | 1266413 | 706114  | 55,76 | 5 |
| 35 | 2407378 | 1497518 | 1056798 | 70,6  | 1 |
| 36 | 3077048 | 1399924 | 908131  | 64,9  | 1 |
| 37 | 8557830 | 2135882 | 1395795 | 65,35 | 5 |
| 38 | 3560635 | 2222714 | 1488774 | 67,0  | 1 |
| 39 | 8418266 | 1529053 | 1014130 | 66,32 | 5 |
| 40 | 5025407 | 2326499 | 1566897 | 67,4  | 3 |
| 41 | 8578539 | 2635314 | 1911714 | 72,54 | 5 |
| 42 | 5339248 | 4316894 | 4065651 | 94,2  | 3 |
| 43 | 3501497 | 2326197 | 1581116 | 68,0  | 1 |
| 44 | 3484467 | 1898310 | 1124369 | 59,2  | 3 |
| 45 | 8987063 | 1807260 | 1074253 | 59,44 | 5 |
| 46 | 3088668 | 1859142 | 947233  | 51,0  | 1 |
| 47 | 3580227 | 2096321 | 1204127 | 57,4  | 1 |
| 48 | 3555370 | 2286197 | 599898  | 26,2  | 1 |
| 49 | 5538671 | 1871225 | 1256570 | 67,2  | 4 |
| 50 | 5243371 | 1801072 | 1432711 | 79,5  | 4 |
| 51 | 3255616 | 1636776 | 1231183 | 75,2  | 3 |
| 52 | 3821925 | 2691913 | 1839653 | 68,3  | 1 |
| 53 | 8962420 | 4394109 | 3066995 | 69,80 | 5 |
| 54 | 5544303 | 532069  | 405703  | 76,3  | 2 |
| 55 | 2246559 | 1244461 | 497038  | 39,9  | 1 |
| 56 | 8384410 | 2249250 | 1049961 | 46,68 | 5 |
| 57 | 7918159 | 1916372 | 1010257 | 52,72 | 5 |
| 58 | 6362125 | 1427147 | 701803  | 49,2  | 4 |
| 59 | 4600904 | 2214827 | 1595027 | 72,0  | 4 |

|    |         |         |         |       |   |
|----|---------|---------|---------|-------|---|
| 60 | 6193974 | 524566  | 380831  | 72,6  | 4 |
| 61 | 4158660 | 1133085 | 905108  | 79,9  | 3 |
| 62 | 3498996 | 1279983 | 1011187 | 79,0  | 2 |
| 63 | 6498834 | 1959171 | 1629515 | 83,2  | 4 |
| 64 | 4348292 | 699138  | 537497  | 76,9  | 3 |
| 65 | 4208672 | 2144152 | 1572092 | 73,3  | 2 |
| 66 | 5564550 | 2002770 | 1216930 | 60,76 | 5 |
| 67 | 4154330 | 1685414 | 1349511 | 80,1  | 3 |
| 68 | 4921665 | 689803  | 605993  | 87,9  | 4 |
| 69 | 5718758 | 3014031 | 1782799 | 59,2  | 2 |
| 70 | 4117070 | 3066551 | 2275381 | 74,2  | 3 |
| 71 | 3295089 | 2022602 | 1248148 | 61,7  | 3 |
| 72 | 6035292 | 1683609 | 950202  | 56,4  | 4 |
| 73 | 6912564 | 1215811 | 862655  | 71,0  | 4 |
| 74 | 1988898 | 1178888 | 926252  | 78,6  | 2 |
| 75 | 8734894 | 3157102 | 2576965 | 81,6  | 4 |
| 76 | 2062633 | 1021260 | 584671  | 57,3  | 3 |
| 77 | 3985984 | 2178874 | 1756608 | 80,6  | 2 |
| 78 | 3296463 | 1679190 | 1201293 | 71,5  | 2 |
| 79 | 5531534 | 3456993 | 2484541 | 71,9  | 2 |
| 80 | 6707081 | 2307250 | 1744176 | 75,6  | 4 |
| 81 | 7858850 | 3300248 | 2205613 | 66,83 | 5 |
| 82 | 6014121 | 3602895 | 2643804 | 73,4  | 2 |
| 83 | 1289001 | 726877  | 462439  | 63,6  | 2 |
| 84 | 8734385 | 3009878 | 2092214 | 69,51 | 6 |
| 85 | 4246355 | 914245  | 646828  | 70,8  | 2 |
| 86 | 1475693 | 594181  | 125491  | 21,1  | 2 |
| 87 | 6318488 | 1869462 | 1021829 | 54,66 | 5 |
| 88 | 5766097 | 1469244 | 1224695 | 83,4  | 4 |
| 89 | 5653397 | 993885  | 821817  | 82,7  | 4 |
| 90 | 5633955 | 522207  | 347875  | 66,6  | 4 |
| 91 | 4663150 | 1278217 | 958155  | 75,0  | 4 |
| 92 | 4471752 | 1078397 | 833289  | 77,3  | 4 |
| 93 | 6400881 | 2531331 | 1484301 | 58,6  | 4 |

**Supplementary Table 2.** False discovery rate correction of module-METd correlation significance.

| Module      | Omics   | Method | Adj.P-value |        |      |
|-------------|---------|--------|-------------|--------|------|
|             |         |        | Full cohort | Female | Male |
| MEglaucous  | c-miRNA | BH     | 0.22        | 0.71   | 0.91 |
| MEgreen     | c-miRNA | BH     | 0.22        | 0.71   | 0.46 |
| MEblue      | c-miRNA | BH     | 0.5         | 0.97   | 0.45 |
|             |         |        |             |        |      |
| MEyellow    | c-Metab | BH     | 0.003       | 0.007  | 0.56 |
| MEturquoise | c-Metab | BH     | 0.017       | 0.007  | 0.56 |
| MEpink      | c-Metab | BH     | 0.003       | 0.003  | 0.56 |

**Supplementary Table 3.** Correlation of physical-activity-associated co-expression modules and BMI, age and previous cancer history. Biweighted midcorrelation was used to study the correlation between BMI, age and module, whereas Pearson correlation was used to study the correlation between previous cancer history and module expression level. Significant correlations are highlighted in yellow (p-value).

| Module      | Omics   | Variable        | Correlation (p-value) |                   |                      |
|-------------|---------|-----------------|-----------------------|-------------------|----------------------|
|             |         |                 | Full cohort           | Female            | Male                 |
| MEglauous   | c-miRNA | BMI             | -0.28<br>(7.47e-03)   | -0.35<br>(0.014)  | -0.21<br>(0.175)     |
|             |         | Age             | 0.07<br>(0.516)       | -0.01<br>( 0.932) | 0.20<br>(0.191)      |
|             |         | Previous cancer | 0.15<br>(0.159)       | 0.16<br>(0.270)   | 0.13<br>(0.4)        |
| MEgreen     | c-miRNA | BMI             | 0.32<br>(0.002)       | 0.32<br>(0.024)   | 0.26<br>(0.089)      |
|             |         | Age             | 0.12<br>(0.258)       | 0.27<br>(0.058)   | -0.08<br>(0.592)     |
|             |         | Previous cancer | 0.11<br>(0.292)       | 0.22<br>(0.134)   | -0.05<br>(0.758)     |
| MEblue      | c-miRNA | BMI             | -0.24<br>(0.02)       | -0.25<br>(0.09)   | -0.22<br>(0.150)     |
|             |         | Age             | -0.01<br>(0.942)      | -0.22<br>( 0.137) | 0.19<br>(0.219)      |
|             |         | Previous cancer | -0.01<br>(0.942)      | -0.22<br>(0.121)  | 0.2<br>(0.191)       |
|             |         |                 |                       |                   |                      |
| MEyellow    | c-Metab | BMI             | -0.491<br>(5.76e-07)  | -0.457<br>(0.001) | -0.599<br>(1.77e-05) |
|             |         | Age             | 0.024<br>(0.818)      | -0.03<br>(0.837)  | 0.210<br>(0.170)     |
|             |         | Previous cancer | 0.09<br>(0.409)       | 0.07<br>(0.638)   | 0.1<br>(0.515)       |
| MEturquoise | c-Metab | BMI             | 0.405<br>(5.57e-05)   | 0.354<br>(0.013)  | 0.473<br>(1.18e-03)  |
|             |         | Age             | 0.103<br>(0.327)      | 0.259<br>(0.072)  | -0.113<br>(0.464)    |
|             |         | Previous cancer | -0.02<br>(0.815)      | 0.12<br>(0.410)   | -0.22<br>(0.154)     |
| MEpink      | c-Metab | BMI             | -0.427<br>(1.97e-05)  | -0.375<br>(0.008) | -0.546<br>(1.28e-04) |
|             |         | Age             | -0.099<br>(0.343)     | -0.143<br>(0.327) | -0.072<br>(0.644)    |
|             |         | Previous cancer | -0.03<br>(0.781)      | -0.07<br>(0.638)  | 0.02<br>(0.890)      |

**Supplementary Table 4.** Results of the structural equation model (SEM) examining associations between physical activity, diet, BMI, and circulating microRNA modules. The table summarizes the direct and indirect relationships among daily metabolic equivalent of tasks (METd), fat intake, energy intake, sex, body mass index (BMI), and circulating miRNA modules (MEglaucous, MEgreen, and MEblue). Reported values include unstandardized estimates, *p*-values, standardized coefficients ( $\beta$ ), and an interpretation of each pathway. Direct effects refer to relationships between predictors and BMI. Indirect effects represent mediated pathways from METd through BMI to circulating miRNA modules. Significant and marginal associations are noted based on *p*-values.

| Pathway                                         | Estimate | p-value | Standardized $\beta$ | Interpretation                                                |
|-------------------------------------------------|----------|---------|----------------------|---------------------------------------------------------------|
| <b>Direct effects on BMI</b>                    |          |         |                      |                                                               |
| METd $\rightarrow$ BMI                          | -0.326   | 0.009   | -0.264               | Significant: higher physical activity $\rightarrow$ lower BMI |
| Fat intake $\rightarrow$ BMI                    | -0.038   | 0.470   | -0.246               | Not significant                                               |
| Energy intake (kJ) $\rightarrow$ BMI            | 0.000    | 0.609   | 0.176                | Not significant                                               |
| Sex $\rightarrow$ BMI                           | 0.582    | 0.626   | 0.051                | Not significant                                               |
| <b>Indirect effects via BMI</b>                 |          |         |                      |                                                               |
| METd $\rightarrow$ BMI $\rightarrow$ MEglaucous | +0.001   | 0.085.  | +0.062               | Marginal, not significant                                     |
| METd $\rightarrow$ BMI $\rightarrow$ MEgreen    | -0.002   | 0.064.  | -0.070               | Marginal, not significant                                     |
| METd $\rightarrow$ BMI $\rightarrow$ MEblue     | +0.001   | 0.095.  | +0.060               | Marginal, not significant                                     |
| <b>Total indirect effect (via BMI)</b>          | +0.001   | 0.353   | +0.052               | Overall not significant                                       |

**Supplementary Table 5.** Results of the structural equation model (SEM) examining associations between physical activity, diet, BMI, and circulating metabolite modules. The table summarizes the direct and indirect relationships among daily metabolic equivalent of tasks (METd), fat intake, energy intake, sex, body mass index (BMI), and circulating metabolite modules (MEyellow, MEturquoise, and MEpink). Reported values include unstandardized estimates, *p*-values, standardized coefficients ( $\beta$ ), and an interpretation of each pathway. Direct effects refer to relationships between predictors and BMI. Indirect effects represent mediated pathways from METd through BMI to circulating metabolite modules. Significant and marginal associations are noted based on *p*-values.

| Pathway                                          | Estimate | p-value | Standardized $\beta$ | Interpretation                                                |
|--------------------------------------------------|----------|---------|----------------------|---------------------------------------------------------------|
| <b>Direct effects on BMI</b>                     |          |         |                      |                                                               |
| METd $\rightarrow$ BMI                           | -0.326   | 0.009   | -0.264               | Significant: higher physical activity $\rightarrow$ lower BMI |
| Fat intake $\rightarrow$ BMI                     | -0.038   | 0.470   | -0.246               | Not significant                                               |
| Energy intake (kJ) $\rightarrow$ BMI             | 0.000    | 0.609   | 0.176                | Not significant                                               |
| Sex $\rightarrow$ BMI                            | 0.582    | 0.626   | 0.051                | Not significant                                               |
| <b>Indirect effects via BMI</b>                  |          |         |                      |                                                               |
| METd $\rightarrow$ BMI $\rightarrow$ MEyellow    | 0.002    | 0.025   | 0.102                | Significant positive indirect effect                          |
| METd $\rightarrow$ BMI $\rightarrow$ MEturquoise | -0.002   | 0.044   | -0.083               | Significant negative indirect effect                          |
| METd $\rightarrow$ BMI $\rightarrow$ MEpink      | 0.002    | 0.034   | 0.095                | Significant positive indirect effect                          |
| <b>Total indirect effect (via BMI)</b>           | 0.003    | 0.032   | 0.114                | Overall significant mediation effect                          |

**Supplementary Table 6.** Cancer over-representation analysis of physical activity-associated c-miRNAs.

| Subcategory                                  | Enrichment       | P-value | P-adjusted | Observed | miRNAs/precursors                                                                                                                                                                                                                                                 |
|----------------------------------------------|------------------|---------|------------|----------|-------------------------------------------------------------------------------------------------------------------------------------------------------------------------------------------------------------------------------------------------------------------|
| <b>Module glaucous</b>                       |                  |         |            |          |                                                                                                                                                                                                                                                                   |
| Kidney chromophobe cancer                    | over-represented | 6.68e-5 | 0.0040615  | 6        | hsa-miR-1307-5p; hsa-miR-26a-5p; hsa-miR-301a-3p; hsa-miR-374a-5p; hsa-miR-590-3p; hsa-miR-30d-3p                                                                                                                                                                 |
| <b>Module green</b>                          |                  |         |            |          |                                                                                                                                                                                                                                                                   |
| Prostate cancer                              | over-represented | 1.45e-8 | 6.76e-7    | 16       | hsa-miR-122-5p; hsa-miR-125b-5p; hsa-miR-128-3p; hsa-miR-148a-3p; hsa-miR-152-3p; hsa-miR-192-5p; hsa-miR-193b-5p; hsa-miR-194-5p; hsa-miR-27b-3p; hsa-miR-28-3p; hsa-miR-30d-5p; hsa-miR-34a-5p; hsa-miR-378c; hsa-miR-483-5p; hsa-miR-95-3p; hsa-miR-885-3p     |
| Progesterone-receptor negative breast cancer | over-represented | 5.86e-8 | 1.78e-6    | 16       | hsa-miR-122-5p; hsa-miR-125b-5p; hsa-miR-128-3p; hsa-miR-146b-3p; hsa-miR-148a-3p; hsa-miR-152-3p; hsa-miR-192-5p; hsa-miR-193a-5p; hsa-miR-193b-5p; hsa-miR-194-5p; hsa-miR-28-3p; hsa-miR-30d-5p; hsa-miR-34a-5p; hsa-miR-483-5p; hsa-miR-95-3p; hsa-miR-885-3p |
| Lung cancer                                  | over-represented | 1.38e-7 | 3.06e-6    | 16       | hsa-miR-122-5p; hsa-miR-125b-5p; hsa-miR-128-3p; hsa-miR-146b-3p; hsa-miR-152-3p; hsa-miR-192-5p; hsa-miR-193a-5p; hsa-miR-193b-5p; hsa-miR-194-5p; hsa-miR-27b-3p; hsa-miR-28-3p; hsa-miR-30d-5p; hsa-miR-34a-5p; hsa-miR-483-5p; hsa-miR-95-3p; hsa-miR-885-3p  |
| Estrogen-receptor positive breast cancer     | over-represented | 1.63e-7 | 3.24e-6    | 16       | hsa-miR-122-5p; hsa-miR-125b-5p; hsa-miR-128-3p; hsa-miR-146b-3p; hsa-miR-148a-3p; hsa-miR-152-3p; hsa-miR-192-5p; hsa-miR-193a-5p; hsa-miR-193b-5p; hsa-miR-194-5p; hsa-miR-28-3p; hsa-miR-30d-5p; hsa-miR-34a-5p; hsa-miR-483-5p; hsa-miR-95-3p; hsa-miR-885-3p |
| Progesterone-receptor positive breast cancer | over-represented | 1.59e-7 | 3.24e-6    | 16       | hsa-miR-122-5p; hsa-miR-125b-5p; hsa-miR-128-3p; hsa-miR-146b-3p; hsa-miR-148a-3p; hsa-miR-152-3p; hsa-miR-192-5p; hsa-miR-193a-5p; hsa-miR-193b-5p; hsa-miR-194-5p; hsa-miR-27b-3p; hsa-miR-28-3p; hsa-miR-34a-5p; hsa-miR-483-5p; hsa-miR-95-3p; hsa-miR-885-3p |
| Breast cancer luminal                        | over-represented | 1.90e-7 | 3.59e-6    | 11       | hsa-miR-125b-5p; hsa-miR-128-3p; hsa-miR-148a-3p; hsa-miR-192-5p; hsa-miR-193a-5p; hsa-miR-193b-5p; hsa-miR-194-5p; hsa-miR-28-3p; hsa-miR-34a-5p; hsa-miR-483-5p; hsa-miR-95-3p                                                                                  |
| Estrogen-receptor negative breast cancer     | over-represented | 5.31e-7 | 8.23e-6    | 15       | hsa-miR-122-5p; hsa-miR-125b-5p; hsa-miR-128-3p; hsa-miR-146b-3p; hsa-miR-152-3p; hsa-miR-192-5p; hsa-miR-193a-5p; hsa-miR-193b-5p; hsa-miR-194-5p; hsa-miR-27b-3p; hsa-miR-30d-5p; hsa-miR-34a-5p; hsa-miR-483-5p; hsa-miR-95-3p; hsa-miR-885-3p                 |
| Bladder cancer                               | over-represented | 1.42e-6 | 1.68e-5    | 8        | hsa-miR-125b-5p; hsa-miR-148a-3p; hsa-miR-152-3p; hsa-miR-192-5p; hsa-miR-193a-5p; hsa-miR-27b-3p; hsa-miR-28-3p; hsa-miR-34a-5p                                                                                                                                  |

|                                      |                  |         |         |    |                                                                                                                                                                                                                                                                                                 |
|--------------------------------------|------------------|---------|---------|----|-------------------------------------------------------------------------------------------------------------------------------------------------------------------------------------------------------------------------------------------------------------------------------------------------|
| Breast cancer                        | over-represented | 3.43e-6 | 3.38e-5 | 17 | hsa-miR-122-5p; hsa-miR-125b-5p; hsa-miR-128-3p; hsa-miR-146b-3p; hsa-miR-148a-3p; hsa-miR-152-3p; hsa-miR-192-5p; hsa-miR-193a-5p; hsa-miR-193b-5p; hsa-miR-194-5p; hsa-miR-27b-3p; hsa-miR-28-3p; hsa-miR-30d-5p; hsa-miR-34a-5p; hsa-miR-483-5p; hsa-miR-95-3p; hsa-miR-885-3p               |
| Basal-like breast cancer             | over-represented | 3.59e-6 | 3.48e-5 | 9  | hsa-miR-122-5p; hsa-miR-128-3p; hsa-miR-192-5p; hsa-miR-193a-5p; hsa-miR-193b-5p; hsa-miR-194-5p; hsa-miR-30d-5p; hsa-miR-34a-5p; hsa-miR-483-5p                                                                                                                                                |
| Her2-receptor positive breast cancer | over-represented | 7.65e-6 | 6.36e-5 | 14 | hsa-miR-122-5p; hsa-miR-125b-5p; hsa-miR-128-3p; hsa-miR-146b-3p; hsa-miR-152-3p; hsa-miR-192-5p; hsa-miR-193a-5p; hsa-miR-193b-5p; hsa-miR-194-5p; hsa-miR-28-3p; hsa-miR-34a-5p; hsa-miR-483-5p; hsa-miR-95-3p; hsa-miR-885-3p                                                                |
| Hypopharynx cancer                   | over-represented | 2.44e-5 | 1.08e-4 | 5  | hsa-miR-122-5p; hsa-miR-125b-5p; hsa-miR-148a-3p; hsa-miR-27b-3p; hsa-miR-34a-5p                                                                                                                                                                                                                |
| Pancreatic cancer                    | over-represented | 1.63e-5 | 1.08e-4 | 18 | hsa-miR-122-5p; hsa-miR-125b-5p; hsa-miR-128-3p; hsa-miR-146b-3p; hsa-miR-148a-3p; hsa-miR-152-3p; hsa-miR-192-5p; hsa-miR-193a-5p; hsa-miR-193b-5p; hsa-miR-194-5p; hsa-miR-27b-3p; hsa-miR-28-3p; hsa-miR-30d-5p; hsa-miR-34a-5p; hsa-miR-378c; hsa-miR-483-5p; hsa-miR-95-3p; hsa-miR-885-3p |
| Nasopharyngeal cancer                | over-represented | 2.89e-5 | 1.21e-4 | 13 | hsa-miR-122-5p; hsa-miR-125b-5p; hsa-miR-128-3p; hsa-miR-148a-3p; hsa-miR-152-3p; hsa-miR-193b-5p; hsa-miR-194-5p; hsa-miR-27b-3p; hsa-miR-28-3p; hsa-miR-30d-5p; hsa-miR-34a-5p; hsa-miR-483-5p; hsa-miR-885-3p                                                                                |
| Ovarian cancer                       | over-represented | 3.94e-5 | 1.49e-4 | 10 | hsa-miR-125b-5p; hsa-miR-128-3p; hsa-miR-148a-3p; hsa-miR-152-3p; hsa-miR-192-5p; hsa-miR-194-5p; hsa-miR-27b-3p; hsa-miR-30d-5p; hsa-miR-34a-5p; hsa-miR-483-5p                                                                                                                                |
| Colorectal cancer                    | over-represented | 5.59e-5 | 2.01e-4 | 17 | hsa-miR-122-5p; hsa-miR-125b-5p; hsa-miR-128-3p; hsa-miR-146b-3p; hsa-miR-148a-3p; hsa-miR-152-3p; hsa-miR-192-5p; hsa-miR-193a-5p; hsa-miR-193b-5p; hsa-miR-194-5p; hsa-miR-27b-3p; hsa-miR-28-3p; hsa-miR-30d-5p; hsa-miR-34a-5p; hsa-miR-378c; hsa-miR-483-5p; hsa-miR-95-3p                 |
| Head and neck cancer                 | over-represented | 5.59e-5 | 2.01e-4 | 8  | hsa-miR-122-5p; hsa-miR-125b-5p; hsa-miR-128-3p; hsa-miR-148a-3p; hsa-miR-152-3p; hsa-miR-194-5p; hsa-miR-30d-5p; hsa-miR-95-3p                                                                                                                                                                 |
| Small cell lung cancer               | over-represented | 5.57e-5 | 2.01e-4 | 9  | hsa-miR-125b-5p; hsa-miR-128-3p; hsa-miR-148a-3p; hsa-miR-152-3p; hsa-miR-193a-5p; hsa-miR-30d-5p; hsa-miR-34a-5p; hsa-miR-483-5p; hsa-miR-95-3p                                                                                                                                                |
| Urinary bladder cancer               | over-represented | 2.31e-4 | 7.62e-4 | 6  | hsa-miR-125b-5p; hsa-miR-152-3p; hsa-miR-193a-5p; hsa-miR-194-5p; hsa-miR-27b-3p; hsa-miR-28-3p                                                                                                                                                                                                 |

|                                |                  |           |           |    |                                                                                                                                                                                                                 |
|--------------------------------|------------------|-----------|-----------|----|-----------------------------------------------------------------------------------------------------------------------------------------------------------------------------------------------------------------|
| Uterus cancer                  | over-represented | 2.63e-4   | 8.46e-4   | 6  | hsa-miR-122-5p; hsa-miR-128-3p; hsa-miR-148a-3p; hsa-miR-192-5p; hsa-miR-194-5p; hsa-miR-34a-5p                                                                                                                 |
| Germ cell and embryonal cancer | over-represented | 4.04e-4   | 0.0010687 | 4  | hsa-miR-122-5p; hsa-miR-125b-5p; hsa-miR-148a-3p; hsa-miR-34a-5p                                                                                                                                                |
| Thyroid cancer                 | over-represented | 4.75e-4   | 0.0011745 | 7  | hsa-miR-125b-5p; hsa-miR-148a-3p; hsa-miR-152-3p; hsa-miR-193b-5p; hsa-miR-27b-3p; hsa-miR-30d-5p; hsa-miR-34a-5p                                                                                               |
| Kidney cancer                  | over-represented | 5.40e-4   | 0.0012946 | 5  | hsa-miR-122-5p; hsa-miR-125b-5p; hsa-miR-194-5p; hsa-miR-34a-5p; hsa-miR-483-5p                                                                                                                                 |
| Tongue cancer                  | over-represented | 5.85e-4   | 0.0013785 | 4  | hsa-miR-122-5p; hsa-miR-125b-5p; hsa-miR-148a-3p; hsa-miR-34a-5p                                                                                                                                                |
| Skin cancer                    | over-represented | 6.27e-4   | 0.0014627 | 4  | hsa-miR-122-5p; hsa-miR-125b-5p; hsa-miR-148a-3p; hsa-miR-34a-5p                                                                                                                                                |
| Mixed cell type cancer         | over-represented | 7.71e-4   | 0.0017306 | 2  | hsa-miR-125b-5p; hsa-miR-34a-5p                                                                                                                                                                                 |
| Kidney chromophobe cancer      | over-represented | 7.91e-4   | 0.0017644 | 9  | hsa-miR-146b-3p; hsa-miR-152-3p; hsa-miR-192-5p; hsa-miR-193a-5p; hsa-miR-193b-5p; hsa-miR-194-5p; hsa-miR-27b-3p; hsa-miR-30d-5p; hsa-miR-95-3p                                                                |
| Sporadic breast cancer         | over-represented | 0.0010747 | 0.0023153 | 2  | hsa-miR-125b-5p; hsa-miR-34a-5p                                                                                                                                                                                 |
| Tonsil cancer                  | over-represented | 0.001137  | 0.0024344 | 6  | hsa-miR-125b-5p; hsa-miR-128-3p; hsa-miR-192-5p; hsa-miR-30d-5p; hsa-miR-34a-5p; hsa-miR-95-3p                                                                                                                  |
| Familial ovarian cancer        | over-represented | 0.0013877 | 0.0029087 | 10 | hsa-miR-122-5p; hsa-miR-128-3p; hsa-miR-148a-3p; hsa-miR-152-3p; hsa-miR-192-5p; hsa-miR-193a-5p; hsa-miR-193b-5p; hsa-miR-30d-5p; hsa-miR-483-5p; hsa-miR-95-3p                                                |
| Gallbladder cancer             | over-represented | 0.0014267 | 0.0029549 | 2  | hsa-miR-125b-5p; hsa-miR-34a-5p                                                                                                                                                                                 |
| Breast cancer her3+ negative   | over-represented | 0.0017589 | 0.0035793 | 10 | hsa-miR-122-5p; hsa-miR-125b-5p; hsa-miR-128-3p; hsa-miR-146b-3p; hsa-miR-152-3p; hsa-miR-193a-5p; hsa-miR-193b-5p; hsa-miR-28-3p; hsa-miR-483-5p; hsa-miR-885-3p                                               |
| Uterine cancer                 | over-represented | 0.0021991 | 0.0043607 | 5  | hsa-miR-122-5p; hsa-miR-128-3p; hsa-miR-148a-3p; hsa-miR-192-5p; hsa-miR-34a-5p                                                                                                                                 |
| Ocular cancer                  | over-represented | 0.0033036 | 0.00637   | 2  | hsa-miR-125b-5p; hsa-miR-34a-5p                                                                                                                                                                                 |
| Esophageal cancer              | over-represented | 0.0038809 | 0.007361  | 13 | hsa-miR-122-5p; hsa-miR-125b-5p; hsa-miR-128-3p; hsa-miR-148a-3p; hsa-miR-152-3p; hsa-miR-192-5p; hsa-miR-193a-5p; hsa-miR-194-5p; hsa-miR-27b-3p; hsa-miR-28-3p; hsa-miR-30d-5p; hsa-miR-95-3p; hsa-miR-885-3p |
| Adrenal cortex cancer          | over-represented | 0.004054  | 0.0076068 | 3  | hsa-miR-125b-5p; hsa-miR-148a-3p; hsa-miR-34a-5p                                                                                                                                                                |
| Testicular cancer              | over-represented | 0.0051655 | 0.0091049 | 3  | hsa-miR-122-5p; hsa-miR-125b-5p; hsa-miR-34a-5p                                                                                                                                                                 |
| Salivary gland cancer          | over-represented | 0.0054694 | 0.0092887 | 3  | hsa-miR-125b-5p; hsa-miR-148a-3p; hsa-miR-34a-5p                                                                                                                                                                |
| Hematologic cancer             | over-represented | 0.0061093 | 0.0100573 | 3  | hsa-miR-148a-3p; hsa-miR-152-3p; hsa-miR-34a-5p                                                                                                                                                                 |
| Brain cancer                   | over-represented | 0.0091103 | 0.0134156 | 3  | hsa-miR-125b-5p; hsa-miR-148a-3p; hsa-miR-152-3p                                                                                                                                                                |



|                               |                  |           |           |    |                                                                                                                                                                                                                                                                                                                                                                                                                                                                                                                                                                                                 |
|-------------------------------|------------------|-----------|-----------|----|-------------------------------------------------------------------------------------------------------------------------------------------------------------------------------------------------------------------------------------------------------------------------------------------------------------------------------------------------------------------------------------------------------------------------------------------------------------------------------------------------------------------------------------------------------------------------------------------------|
| Germ cell cancer              | over-represented | 0.0101009 | 0.0147191 | 2  | hsa-miR-125b-5p; hsa-miR-34a-5p                                                                                                                                                                                                                                                                                                                                                                                                                                                                                                                                                                 |
| Gastric cancer                | over-represented | 0.0111548 | 0.0160537 | 16 | hsa-miR-122-5p; hsa-miR-125b-5p; hsa-miR-146b-3p; hsa-miR-148a-3p; hsa-miR-152-3p; hsa-miR-192-5p; hsa-miR-193a-5p; hsa-miR-193b-5p; hsa-miR-194-5p; hsa-miR-27b-3p; hsa-miR-28-3p; hsa-miR-30d-5p; hsa-miR-34a-5p; hsa-miR-483-5p; hsa-miR-95-3p; hsa-miR-885-3p                                                                                                                                                                                                                                                                                                                               |
| Triple negative breast cancer | over-represented | 0.0152907 | 0.0206041 | 2  | hsa-miR-27b-3p; hsa-miR-34a-5p                                                                                                                                                                                                                                                                                                                                                                                                                                                                                                                                                                  |
| Endometrial cancer            | over-represented | 0,0161582 | 0.0216476 | 3  | hsa-miR-125b-5p; hsa-miR-152-3p; hsa-miR-194-5p                                                                                                                                                                                                                                                                                                                                                                                                                                                                                                                                                 |
| Non-small cell lung cancer    | over-represented | 0,0186097 | 0.024695  | 3  | hsa-miR-128-3p; hsa-miR-34a-5p; hsa-miR-483-5p                                                                                                                                                                                                                                                                                                                                                                                                                                                                                                                                                  |
| Colon cancer                  | over-represented | 0.0327542 | 0.0397608 | 16 | hsa-miR-122-5p; hsa-miR-125b-5p; hsa-miR-128-3p; hsa-miR-146b-3p; hsa-miR-148a-3p; hsa-miR-152-3p; hsa-miR-192-5p; hsa-miR-193a-5p; hsa-miR-194-5p; hsa-miR-27b-3p; hsa-miR-28-3p; hsa-miR-30d-5p; hsa-miR-34a-5p; hsa-miR-378c; hsa-miR-483-5p; hsa-miR-95-3p                                                                                                                                                                                                                                                                                                                                  |
| Stomach cancer                | over-represented | 0.0385148 | 0.0457199 | 14 | hsa-miR-125b-5p; hsa-miR-146b-3p; hsa-miR-148a-3p; hsa-miR-152-3p; hsa-miR-193a-5p; hsa-miR-193b-5p; hsa-miR-194-5p; hsa-miR-27b-3p; hsa-miR-28-3p; hsa-miR-30d-5p; hsa-miR-34a-5p; hsa-miR-483-5p; hsa-miR-95-3p; hsa-miR-885-3p                                                                                                                                                                                                                                                                                                                                                               |
| <b>Module blue</b>            |                  |           |           |    |                                                                                                                                                                                                                                                                                                                                                                                                                                                                                                                                                                                                 |
| Breast cancer                 | over-represented | 3.87e-12  | 1.58e-10  | 36 | hsa-miR-130b-3p; hsa-miR-145-5p; hsa-miR-15b-3p; hsa-miR-15b-5p; hsa-miR-17-5p; hsa-miR-18a-5p; hsa-miR-1908-5p; hsa-miR-195-5p; hsa-miR-204-5p; hsa-miR-205-5p; hsa-miR-222-3p; hsa-miR-30b-5p; hsa-miR-30c-5p; hsa-miR-335-3p; hsa-miR-339-3p; hsa-miR-339-5p; hsa-miR-33a-5p; hsa-miR-345-5p; hsa-miR-421; hsa-miR-425-3p; hsa-miR-450b-5p; hsa-miR-454-5p; hsa-miR-483-3p; hsa-miR-491-5p; hsa-miR-505-5p; hsa-miR-532-3p; hsa-miR-628-5p; hsa-miR-664a-3p; hsa-miR-365a-3p; hsa-miR-548z; hsa-miR-766-3p; hsa-let-7b-3p; hsa-let-7f-2-3p; hsa-miR-1296-5p; hsa-miR-133a-3p; hsa-miR-7-1-3p |
| Kidney chromophobe cancer     | over-represented | 4.50e-10  | 1.11e-8   | 23 | hsa-miR-1306-5p; hsa-miR-130b-3p; hsa-miR-145-5p; hsa-miR-15b-3p; hsa-miR-15b-5p; hsa-miR-18a-5p; hsa-miR-195-5p; hsa-miR-204-5p; hsa-miR-222-3p; hsa-miR-30b-5p; hsa-miR-30c-5p; hsa-miR-335-3p; hsa-miR-425-3p; hsa-miR-450b-5p; hsa-miR-483-3p; hsa-miR-505-5p; hsa-miR-664a-3p; hsa-miR-365a-3p; hsa-miR-365b-3p; hsa-miR-766-3p; hsa-let-7b-3p; hsa-miR-133a-3p; hsa-miR-7-1-3p                                                                                                                                                                                                            |
| Lung cancer                   | over-represented | 5.64e-10  | 1.30e-8   | 29 | hsa-miR-130b-3p; hsa-miR-145-5p; hsa-miR-15b-5p; hsa-miR-17-5p; hsa-miR-18a-5p; hsa-miR-195-5p; hsa-miR-204-5p; hsa-miR-205-5p; hsa-miR-222-3p; hsa-miR-30b-5p; hsa-miR-30c-5p; hsa-miR-339-3p;                                                                                                                                                                                                                                                                                                                                                                                                 |

|                                              |                  |          |         |    |                                                                                                                                                                                                                                                                                                                                                                                                                                                                                                                                                                                  |
|----------------------------------------------|------------------|----------|---------|----|----------------------------------------------------------------------------------------------------------------------------------------------------------------------------------------------------------------------------------------------------------------------------------------------------------------------------------------------------------------------------------------------------------------------------------------------------------------------------------------------------------------------------------------------------------------------------------|
|                                              |                  |          |         |    | hsa-miR-339-5p; hsa-miR-33a-5p; hsa-miR-345-5p; hsa-miR-421; hsa-miR-425-3p; hsa-miR-450b-5p; hsa-miR-483-3p; hsa-miR-491-5p; hsa-miR-532-3p; hsa-miR-628-5p; hsa-miR-664a-3p; hsa-miR-365a-3p; hsa-miR-766-3p; hsa-let-7b-3p; hsa-let-7f-2-3p; hsa-miR-1296-5p; hsa-miR-133a-3p                                                                                                                                                                                                                                                                                                 |
| Progesterone-receptor positive breast cancer | over-represented | 7.14e-10 | 1.55e-8 | 29 | hsa-miR-130b-3p; hsa-miR-145-5p; hsa-miR-15b-3p; hsa-miR-15b-5p; hsa-miR-17-5p; hsa-miR-18a-5p; hsa-miR-1908-5p; hsa-miR-195-5p; hsa-miR-204-5p; hsa-miR-205-5p; hsa-miR-222-3p; hsa-miR-30b-5p; hsa-miR-30c-5p; hsa-miR-335-3p; hsa-miR-339-3p; hsa-miR-339-5p; hsa-miR-33a-5p; hsa-miR-345-5p; hsa-miR-421; hsa-miR-425-3p; hsa-miR-454-5p; hsa-miR-483-3p; hsa-miR-505-5p; hsa-miR-532-3p; hsa-miR-664a-3p; hsa-miR-766-3p; hsa-let-7b-3p; hsa-miR-133a-3p; hsa-miR-7-1-3p                                                                                                    |
| Prostate cancer                              | over-represented | 8.36e-10 | 1.66e-8 | 27 | hsa-miR-130b-3p; hsa-miR-145-5p; hsa-miR-15b-5p; hsa-miR-17-5p; hsa-miR-18a-5p; hsa-miR-195-5p; hsa-miR-204-5p; hsa-miR-205-5p; hsa-miR-222-3p; hsa-miR-30b-5p; hsa-miR-30c-5p; hsa-miR-335-3p; hsa-miR-33a-5p; hsa-miR-345-5p; hsa-miR-421; hsa-miR-425-3p; hsa-miR-450b-5p; hsa-miR-483-3p; hsa-miR-491-5p; hsa-miR-505-5p; hsa-miR-532-3p; hsa-miR-628-5p; hsa-miR-365a-3p; hsa-miR-766-3p; hsa-let-7b-3p; hsa-miR-133a-3p; hsa-miR-7-1-3p                                                                                                                                    |
| Her2-receptor positive breast cancer         | over-represented | 1.07e-9  | 2.06e-8 | 28 | hsa-miR-130b-3p; hsa-miR-145-5p; hsa-miR-15b-3p; hsa-miR-15b-5p; hsa-miR-17-5p; hsa-miR-18a-5p; hsa-miR-1908-5p; hsa-miR-195-5p; hsa-miR-204-5p; hsa-miR-205-5p; hsa-miR-222-3p; hsa-miR-30b-5p; hsa-miR-30c-5p; hsa-miR-335-3p; hsa-miR-339-3p; hsa-miR-339-5p; hsa-miR-33a-5p; hsa-miR-345-5p; hsa-miR-425-3p; hsa-miR-454-5p; hsa-miR-483-3p; hsa-miR-505-5p; hsa-miR-532-3p; hsa-miR-664a-3p; hsa-miR-766-3p; hsa-let-7b-3p; hsa-miR-133a-3p; hsa-miR-7-1-3p                                                                                                                 |
| Colorectal cancer                            | over-represented | 1.44e-8  | 2.08e-7 | 35 | hsa-miR-130b-3p; hsa-miR-145-5p; hsa-miR-15b-5p; hsa-miR-17-5p; hsa-miR-18a-5p; hsa-miR-1908-5p; hsa-miR-195-5p; hsa-miR-204-5p; hsa-miR-205-5p; hsa-miR-222-3p; hsa-miR-30b-5p; hsa-miR-30c-5p; hsa-miR-335-3p; hsa-miR-339-3p; hsa-miR-339-5p; hsa-miR-33a-5p; hsa-miR-345-5p; hsa-miR-3679-5p; hsa-miR-421; hsa-miR-425-3p; hsa-miR-450b-5p; hsa-miR-454-5p; hsa-miR-483-3p; hsa-miR-491-5p; hsa-miR-532-3p; hsa-miR-628-5p; hsa-miR-664a-3p; hsa-miR-365a-3p; hsa-miR-548z; hsa-miR-766-3p; hsa-let-7b-3p; hsa-let-7f-2-3p; hsa-miR-1296-5p; hsa-miR-133a-3p; hsa-miR-7-1-3p |

|                                              |                  |         |         |    |                                                                                                                                                                                                                                                                                                                                                                                                                                             |
|----------------------------------------------|------------------|---------|---------|----|---------------------------------------------------------------------------------------------------------------------------------------------------------------------------------------------------------------------------------------------------------------------------------------------------------------------------------------------------------------------------------------------------------------------------------------------|
| Head and neck cancer                         | over-represented | 2.12e-8 | 2.94e-7 | 16 | hsa-miR-130b-3p; hsa-miR-145-5p; hsa-miR-17-5p; hsa-miR-18a-5p; hsa-miR-195-5p; hsa-miR-204-5p; hsa-miR-205-5p; hsa-miR-222-3p; hsa-miR-30b-5p; hsa-miR-30c-5p; hsa-miR-339-5p; hsa-miR-33a-5p; hsa-miR-421; hsa-miR-491-5p; hsa-miR-766-3p; hsa-miR-133a-3p                                                                                                                                                                                |
| Estrogen-receptor positive breast cancer     | over-represented | 3.49e-8 | 4.57e-7 | 27 | hsa-miR-130b-3p; hsa-miR-145-5p; hsa-miR-15b-3p; hsa-miR-15b-5p; hsa-miR-17-5p; hsa-miR-18a-5p; hsa-miR-1908-5p; hsa-miR-195-5p; hsa-miR-204-5p; hsa-miR-205-5p; hsa-miR-222-3p; hsa-miR-30b-5p; hsa-miR-30c-5p; hsa-miR-335-3p; hsa-miR-339-3p; hsa-miR-339-5p; hsa-miR-33a-5p; hsa-miR-345-5p; hsa-miR-421; hsa-miR-425-3p; hsa-miR-454-5p; hsa-miR-483-3p; hsa-miR-505-5p; hsa-miR-532-3p; hsa-miR-766-3p; hsa-let-7b-3p; hsa-miR-7-1-3p |
| Progesterone-receptor negative breast cancer | over-represented | 4.63e-8 | 5.35e-7 | 26 | hsa-miR-130b-3p; hsa-miR-145-5p; hsa-miR-15b-3p; hsa-miR-15b-5p; hsa-miR-17-5p; hsa-miR-18a-5p; hsa-miR-1908-5p; hsa-miR-195-5p; hsa-miR-204-5p; hsa-miR-205-5p; hsa-miR-222-3p; hsa-miR-30b-5p; hsa-miR-30c-5p; hsa-miR-335-3p; hsa-miR-339-3p; hsa-miR-339-5p; hsa-miR-33a-5p; hsa-miR-421; hsa-miR-425-3p; hsa-miR-454-5p; hsa-miR-483-3p; hsa-miR-664a-3p; hsa-miR-766-3p; hsa-let-7b-3p; hsa-miR-133a-3p; hsa-miR-7-1-3p               |
| Nasopharyngeal cancer                        | over-represented | 7.49e-8 | 8.11e-7 | 25 | hsa-miR-145-5p; hsa-miR-15b-3p; hsa-miR-15b-5p; hsa-miR-17-5p; hsa-miR-18a-5p; hsa-miR-1908-5p; hsa-miR-195-5p; hsa-miR-204-5p; hsa-miR-205-5p; hsa-miR-222-3p; hsa-miR-30b-5p; hsa-miR-30c-5p; hsa-miR-339-3p; hsa-miR-339-5p; hsa-miR-421; hsa-miR-450b-5p; hsa-miR-454-5p; hsa-miR-483-3p; hsa-miR-491-5p; hsa-miR-505-5p; hsa-miR-532-3p; hsa-miR-628-5p; hsa-miR-365a-3p; hsa-miR-766-3p; hsa-miR-7-1-3p                               |
| Estrogen-receptor negative breast cancer     | over-represented | 1.53e-7 | 1.55e-6 | 25 | hsa-miR-130b-3p; hsa-miR-145-5p; hsa-miR-15b-3p; hsa-miR-15b-5p; hsa-miR-17-5p; hsa-miR-18a-5p; hsa-miR-1908-5p; hsa-miR-195-5p; hsa-miR-204-5p; hsa-miR-205-5p; hsa-miR-222-3p; hsa-miR-30b-5p; hsa-miR-30c-5p; hsa-miR-335-3p; hsa-miR-339-3p; hsa-miR-339-5p; hsa-miR-33a-5p; hsa-miR-421; hsa-miR-425-3p; hsa-miR-454-5p; hsa-miR-483-3p; hsa-miR-532-3p; hsa-miR-766-3p; hsa-let-7b-3p; hsa-miR-7-1-3p                                 |
| Small cell lung cancer                       | over-represented | 1.72e-7 | 1.72e-6 | 17 | hsa-miR-130b-3p; hsa-miR-145-5p; hsa-miR-15b-3p; hsa-miR-15b-5p; hsa-miR-17-5p; hsa-miR-18a-5p; hsa-miR-195-5p; hsa-miR-222-3p; hsa-miR-30b-5p; hsa-miR-30c-5p; hsa-miR-335-3p; hsa-miR-345-5p; hsa-miR-421; hsa-miR-491-5p; hsa-miR-505-5p; hsa-miR-628-5p; hsa-miR-7-1-3p                                                                                                                                                                 |

|                             |                  |         |         |    |                                                                                                                                                                                                                                                                                                                                                                                                                                                                                                                                                                   |
|-----------------------------|------------------|---------|---------|----|-------------------------------------------------------------------------------------------------------------------------------------------------------------------------------------------------------------------------------------------------------------------------------------------------------------------------------------------------------------------------------------------------------------------------------------------------------------------------------------------------------------------------------------------------------------------|
| Thyroid cancer              | over-represented | 1.90e-7 | 1.85e-6 | 15 | hsa-miR-145-5p; hsa-miR-15b-3p; hsa-miR-15b-5p; hsa-miR-17-5p; hsa-miR-18a-5p; hsa-miR-195-5p; hsa-miR-204-5p; hsa-miR-205-5p; hsa-miR-222-3p; hsa-miR-335-3p; hsa-miR-339-5p; hsa-miR-345-5p; hsa-miR-421; hsa-miR-133a-3p; hsa-miR-7-1-3p                                                                                                                                                                                                                                                                                                                       |
| Bladder cancer              | over-represented | 2.29e-7 | 2.17e-6 | 12 | hsa-miR-130b-3p; hsa-miR-145-5p; hsa-miR-17-5p; hsa-miR-18a-5p; hsa-miR-195-5p; hsa-miR-204-5p; hsa-miR-205-5p; hsa-miR-30c-5p; hsa-miR-483-3p; hsa-miR-532-3p; hsa-miR-365a-3p; hsa-miR-133a-3p                                                                                                                                                                                                                                                                                                                                                                  |
| Pancreatic cancer           | over-represented | 9.43e-7 | 7.78e-6 | 34 | hsa-miR-130b-3p; hsa-miR-145-5p; hsa-miR-15b-3p; hsa-miR-15b-5p; hsa-miR-17-5p; hsa-miR-18a-5p; hsa-miR-1908-5p; hsa-miR-195-5p; hsa-miR-204-5p; hsa-miR-205-5p; hsa-miR-222-3p; hsa-miR-30b-5p; hsa-miR-30c-5p; hsa-miR-335-3p; hsa-miR-339-5p; hsa-miR-33a-5p; hsa-miR-345-5p; hsa-miR-3679-5p; hsa-miR-421; hsa-miR-425-3p; hsa-miR-450b-5p; hsa-miR-454-5p; hsa-miR-483-3p; hsa-miR-491-5p; hsa-miR-505-5p; hsa-miR-532-3p; hsa-miR-628-5p; hsa-miR-664a-3p; hsa-miR-365a-3p; hsa-miR-766-3p; hsa-let-7b-3p; hsa-let-7f-2-3p; hsa-miR-1296-5p; hsa-miR-7-1-3p |
| Breast cancer luminal       | over-represented | 1.56e-6 | 1.21e-5 | 15 | hsa-miR-130b-3p; hsa-miR-145-5p; hsa-miR-15b-5p; hsa-miR-17-5p; hsa-miR-18a-5p; hsa-miR-204-5p; hsa-miR-222-3p; hsa-miR-335-3p; hsa-miR-339-5p; hsa-miR-33a-5p; hsa-miR-345-5p; hsa-miR-421; hsa-miR-483-3p; hsa-let-7b-3p; hsa-miR-7-1-3p                                                                                                                                                                                                                                                                                                                        |
| Uterine cancer              | over-represented | 2.93e-6 | 2.05e-5 | 11 | hsa-miR-130b-3p; hsa-miR-145-5p; hsa-miR-18a-5p; hsa-miR-195-5p; hsa-miR-204-5p; hsa-miR-205-5p; hsa-miR-222-3p; hsa-miR-339-5p; hsa-miR-33a-5p; hsa-miR-345-5p; hsa-miR-7-1-3p                                                                                                                                                                                                                                                                                                                                                                                   |
| Testicular germ cell cancer | over-represented | 7.85e-6 | 3.93e-5 | 10 | hsa-miR-130b-3p; hsa-miR-145-5p; hsa-miR-15b-3p; hsa-miR-195-5p; hsa-miR-335-3p; hsa-miR-483-3p; hsa-miR-628-5p; hsa-let-7b-3p; hsa-miR-133a-3p; hsa-miR-7-1-3p                                                                                                                                                                                                                                                                                                                                                                                                   |
| Hypopharynx cancer          | over-represented | 9.28e-6 | 4.20e-5 | 7  | hsa-miR-145-5p; hsa-miR-15b-5p; hsa-miR-17-5p; hsa-miR-195-5p; hsa-miR-222-3p; hsa-miR-30b-5p; hsa-miR-133a-3p                                                                                                                                                                                                                                                                                                                                                                                                                                                    |
| Endometrial cancer          | over-represented | 1.23e-5 | 5.12e-5 | 8  | hsa-miR-130b-3p; hsa-miR-145-5p; hsa-miR-17-5p; hsa-miR-18a-5p; hsa-miR-195-5p; hsa-miR-205-5p; hsa-miR-222-3p; hsa-miR-30c-5p                                                                                                                                                                                                                                                                                                                                                                                                                                    |
| Ovarian cancer              | over-represented | 1.63e-5 | 6.39e-5 | 16 | hsa-miR-130b-3p; hsa-miR-17-5p; hsa-miR-18a-5p; hsa-miR-1908-5p; hsa-miR-205-5p; hsa-miR-30b-5p; hsa-miR-30c-5p; hsa-miR-339-3p; hsa-miR-339-5p; hsa-miR-33a-5p; hsa-miR-345-5p; hsa-miR-421; hsa-miR-483-3p; hsa-miR-532-3p; hsa-miR-664a-3p; hsa-miR-766-3p                                                                                                                                                                                                                                                                                                     |

|                                |                  |         |         |    |                                                                                                                                                                                                                                                                                                                                                                                                                                                                                                                                                                  |
|--------------------------------|------------------|---------|---------|----|------------------------------------------------------------------------------------------------------------------------------------------------------------------------------------------------------------------------------------------------------------------------------------------------------------------------------------------------------------------------------------------------------------------------------------------------------------------------------------------------------------------------------------------------------------------|
| Skin cancer                    | over-represented | 1.76e-5 | 6.69e-5 | 7  | hsa-miR-145-5p; hsa-miR-17-5p; hsa-miR-18a-5p; hsa-miR-195-5p; hsa-miR-205-5p; hsa-miR-222-3p; hsa-miR-133a-3p                                                                                                                                                                                                                                                                                                                                                                                                                                                   |
| Urinary bladder cancer         | over-represented | 1.75e-5 | 6.69e-5 | 10 | hsa-miR-130b-3p; hsa-miR-145-5p; hsa-miR-15b-5p; hsa-miR-195-5p; hsa-miR-204-5p; hsa-miR-222-3p; hsa-miR-30b-5p; hsa-miR-483-3p; hsa-miR-532-3p; hsa-miR-365a-3p                                                                                                                                                                                                                                                                                                                                                                                                 |
| Non-small cell lung cancer     | over-represented | 1.82e-5 | 6.91e-5 | 8  | hsa-miR-130b-3p; hsa-miR-145-5p; hsa-miR-17-5p; hsa-miR-18a-5p; hsa-miR-205-5p; hsa-miR-222-3p; hsa-miR-30b-5p; hsa-miR-30c-5p                                                                                                                                                                                                                                                                                                                                                                                                                                   |
| Uterus cancer                  | over-represented | 2.15e-5 | 8.02e-5 | 10 | hsa-miR-130b-3p; hsa-miR-145-5p; hsa-miR-18a-5p; hsa-miR-195-5p; hsa-miR-204-5p; hsa-miR-205-5p; hsa-miR-222-3p; hsa-miR-339-5p; hsa-miR-33a-5p; hsa-miR-345-5p                                                                                                                                                                                                                                                                                                                                                                                                  |
| Breast cancer her3+ negative   | over-represented | 2.44e-5 | 8.92e-5 | 20 | hsa-miR-130b-3p; hsa-miR-145-5p; hsa-miR-15b-3p; hsa-miR-15b-5p; hsa-miR-17-5p; hsa-miR-18a-5p; hsa-miR-1908-5p; hsa-miR-195-5p; hsa-miR-204-5p; hsa-miR-205-5p; hsa-miR-222-3p; hsa-miR-30c-5p; hsa-miR-335-3p; hsa-miR-339-3p; hsa-miR-339-5p; hsa-miR-425-3p; hsa-miR-454-5p; hsa-miR-483-3p; hsa-miR-766-3p; hsa-let-7b-3p                                                                                                                                                                                                                                   |
| Adrenal cortex cancer          | over-represented | 5.17e-5 | 1.80e-4 | 6  | hsa-miR-145-5p; hsa-miR-17-5p; hsa-miR-18a-5p; hsa-miR-195-5p; hsa-miR-205-5p; hsa-miR-222-3p                                                                                                                                                                                                                                                                                                                                                                                                                                                                    |
| Familial ovarian cancer        | over-represented | 6.32e-5 | 2.15e-4 | 19 | hsa-miR-15b-3p; hsa-miR-15b-5p; hsa-miR-17-5p; hsa-miR-18a-5p; hsa-miR-195-5p; hsa-miR-30c-5p; hsa-miR-335-3p; hsa-miR-339-3p; hsa-miR-339-5p; hsa-miR-33a-5p; hsa-miR-421; hsa-miR-425-3p; hsa-miR-454-5p; hsa-miR-491-5p; hsa-miR-505-5p; hsa-miR-532-3p; hsa-miR-628-5p; hsa-let-7b-3p; hsa-miR-7-1-3p                                                                                                                                                                                                                                                        |
| Germ cell and embryonal cancer | over-represented | 9.52e-5 | 2.51e-4 | 6  | hsa-miR-145-5p; hsa-miR-15b-5p; hsa-miR-17-5p; hsa-miR-222-3p; hsa-miR-30b-5p; hsa-miR-133a-3p                                                                                                                                                                                                                                                                                                                                                                                                                                                                   |
| Salivary gland cancer          | over-represented | 9.52e-5 | 2.51e-4 | 6  | hsa-miR-145-5p; hsa-miR-17-5p; hsa-miR-18a-5p; hsa-miR-195-5p; hsa-miR-205-5p; hsa-miR-222-3p                                                                                                                                                                                                                                                                                                                                                                                                                                                                    |
| Gastric cancer                 | over-represented | 1.22e-4 | 2.97e-4 | 34 | hsa-miR-1306-5p; hsa-miR-130b-3p; hsa-miR-145-5p; hsa-miR-15b-3p; hsa-miR-15b-5p; hsa-miR-17-5p; hsa-miR-18a-5p; hsa-miR-1908-5p; hsa-miR-195-5p; hsa-miR-204-5p; hsa-miR-205-5p; hsa-miR-222-3p; hsa-miR-30b-5p; hsa-miR-30c-5p; hsa-miR-335-3p; hsa-miR-339-5p; hsa-miR-33a-5p; hsa-miR-345-5p; hsa-miR-3679-5p; hsa-miR-421; hsa-miR-425-3p; hsa-miR-450b-5p; hsa-miR-454-5p; hsa-miR-483-3p; hsa-miR-491-5p; hsa-miR-505-5p; hsa-miR-532-3p; hsa-miR-365a-3p; hsa-miR-548z; hsa-miR-766-3p; hsa-let-7b-3p; hsa-let-7f-2-3p; hsa-miR-1296-5p; hsa-miR-133a-3p |

|                                  |                  |           |           |    |                                                                                                                                                                                                                                                                                                                                                                                                                                                                                                                                                                    |
|----------------------------------|------------------|-----------|-----------|----|--------------------------------------------------------------------------------------------------------------------------------------------------------------------------------------------------------------------------------------------------------------------------------------------------------------------------------------------------------------------------------------------------------------------------------------------------------------------------------------------------------------------------------------------------------------------|
| Large cell neuroendocrine cancer | over-represented | 1.30e-4   | 3.16e-4   | 9  | hsa-miR-130b-3p; hsa-miR-145-5p; hsa-miR-17-5p; hsa-miR-18a-5p; hsa-miR-195-5p; hsa-miR-30b-5p; hsa-miR-30c-5p; hsa-miR-421; hsa-miR-7-1-3p                                                                                                                                                                                                                                                                                                                                                                                                                        |
| Esophageal cancer                | over-represented | 1.54e-4   | 3.64e-4   | 26 | hsa-miR-1306-5p; hsa-miR-130b-3p; hsa-miR-145-5p; hsa-miR-15b-3p; hsa-miR-15b-5p; hsa-miR-17-5p; hsa-miR-18a-5p; hsa-miR-1908-5p; hsa-miR-195-5p; hsa-miR-204-5p; hsa-miR-205-5p; hsa-miR-222-3p; hsa-miR-30b-5p; hsa-miR-30c-5p; hsa-miR-335-3p; hsa-miR-339-5p; hsa-miR-33a-5p; hsa-miR-3679-5p; hsa-miR-425-3p; hsa-miR-483-3p; hsa-miR-505-5p; hsa-miR-532-3p; hsa-miR-365a-3p; hsa-miR-766-3p; hsa-let-7b-3p; hsa-miR-133a-3p                                                                                                                                 |
| Tongue cancer                    | over-represented | 1.64e-4   | 3.81e-4   | 6  | hsa-miR-145-5p; hsa-miR-17-5p; hsa-miR-18a-5p; hsa-miR-205-5p; hsa-miR-222-3p; hsa-miR-133a-3p                                                                                                                                                                                                                                                                                                                                                                                                                                                                     |
| Basal-like breast cancer         | over-represented | 6.15e-4   | 0.0012497 | 10 | hsa-miR-130b-3p; hsa-miR-145-5p; hsa-miR-15b-5p; hsa-miR-17-5p; hsa-miR-18a-5p; hsa-miR-195-5p; hsa-miR-33a-5p; hsa-miR-483-3p; hsa-miR-532-3p; hsa-miR-365a-3p                                                                                                                                                                                                                                                                                                                                                                                                    |
| Testicular cancer                | over-represented | 8.34e-4   | 0.0016055 | 5  | hsa-miR-145-5p; hsa-miR-17-5p; hsa-miR-18a-5p; hsa-miR-222-3p; hsa-miR-133a-3p                                                                                                                                                                                                                                                                                                                                                                                                                                                                                     |
| Colon cancer                     | over-represented | 0.0012088 | 0.002148  | 34 | hsa-miR-1306-5p; hsa-miR-130b-3p; hsa-miR-145-5p; hsa-miR-15b-3p; hsa-miR-15b-5p; hsa-miR-17-5p; hsa-miR-18a-5p; hsa-miR-1908-5p; hsa-miR-195-5p; hsa-miR-204-5p; hsa-miR-205-5p; hsa-miR-222-3p; hsa-miR-30b-5p; hsa-miR-30c-5p; hsa-miR-335-3p; hsa-miR-339-5p; hsa-miR-33a-5p; hsa-miR-345-5p; hsa-miR-3679-5p; hsa-miR-421; hsa-miR-425-3p; hsa-miR-450b-5p; hsa-miR-454-5p; hsa-miR-483-3p; hsa-miR-491-5p; hsa-miR-505-5p; hsa-miR-532-3p; hsa-miR-365a-3p; hsa-miR-766-3p; hsa-let-7b-3p; hsa-let-7f-2-3p; hsa-miR-1296-5p; hsa-miR-133a-3p; hsa-miR-7-1-3p |
| Rectum cancer                    | over-represented | 0.0014202 | 0.002498  | 5  | hsa-miR-17-5p; hsa-miR-18a-5p; hsa-miR-195-5p; hsa-miR-205-5p; hsa-miR-222-3p                                                                                                                                                                                                                                                                                                                                                                                                                                                                                      |
| Brain cancer                     | over-represented | 0.0021054 | 0.0036359 | 5  | hsa-miR-145-5p; hsa-miR-17-5p; hsa-miR-18a-5p; hsa-miR-195-5p; hsa-miR-205-5p                                                                                                                                                                                                                                                                                                                                                                                                                                                                                      |
| Cervical cancer                  | over-represented | 0.0025841 | 0.0043891 | 4  | hsa-miR-145-5p; hsa-miR-17-5p; hsa-miR-205-5p; hsa-miR-491-5p                                                                                                                                                                                                                                                                                                                                                                                                                                                                                                      |
| Kidney cancer                    | over-represented | 0.0034418 | 0.0056655 | 6  | hsa-miR-145-5p; hsa-miR-17-5p; hsa-miR-18a-5p; hsa-miR-195-5p; hsa-miR-204-5p; hsa-miR-222-3p                                                                                                                                                                                                                                                                                                                                                                                                                                                                      |
| Gastrointestinal system cancer   | over-represented | 0.0052203 | 0.0083548 | 4  | hsa-miR-145-5p; hsa-miR-17-5p; hsa-miR-18a-5p; hsa-miR-205-5p                                                                                                                                                                                                                                                                                                                                                                                                                                                                                                      |
| Triple negative breast cancer    | over-represented | 0.0071879 | 0.0108761 | 3  | hsa-miR-18a-5p; hsa-miR-195-5p; hsa-miR-205-5p                                                                                                                                                                                                                                                                                                                                                                                                                                                                                                                     |
| Adrenocortical cancer            | over-represented | 0.0099642 | 0.0146608 | 5  | hsa-miR-15b-5p; hsa-miR-195-5p; hsa-miR-33a-5p; hsa-miR-483-3p; hsa-miR-766-3p                                                                                                                                                                                                                                                                                                                                                                                                                                                                                     |
| Ocular cancer                    | over-represented | 0.0142656 | 0.0205105 | 2  | hsa-miR-17-5p; hsa-miR-222-3p                                                                                                                                                                                                                                                                                                                                                                                                                                                                                                                                      |

|                           |                  |           |           |    |                                                                                                                                                                                                                                                                                                                                                                              |
|---------------------------|------------------|-----------|-----------|----|------------------------------------------------------------------------------------------------------------------------------------------------------------------------------------------------------------------------------------------------------------------------------------------------------------------------------------------------------------------------------|
| Tonsil cancer             | over-represented | 0.015947  | 0.0212524 | 7  | hsa-miR-17-5p; hsa-miR-18a-5p; hsa-miR-204-5p; hsa-miR-30b-5p; hsa-miR-30c-5p; hsa-miR-339-5p; hsa-miR-483-3p                                                                                                                                                                                                                                                                |
| Cancer                    | over-represented | 0.0251214 | 0.0331602 | 23 | hsa-miR-145-5p; hsa-miR-15b-3p; hsa-miR-204-5p; hsa-miR-30c-5p; hsa-miR-335-3p; hsa-miR-339-3p; hsa-miR-33a-5p; hsa-miR-345-5p; hsa-miR-421; hsa-miR-425-3p; hsa-miR-450b-5p; hsa-miR-454-5p; hsa-miR-483-3p; hsa-miR-491-5p; hsa-miR-505-5p; hsa-miR-532-3p; hsa-miR-628-5p; hsa-miR-664a-3p; hsa-miR-365a-3p; hsa-miR-548z; hsa-let-7b-3p; hsa-let-7f-2-3p; hsa-miR-7-1-3p |
| Small intestine cancer    | over-represented | 0.0284111 | 0.0373603 | 3  | hsa-miR-17-5p; hsa-miR-18a-5p; hsa-miR-664a-3p                                                                                                                                                                                                                                                                                                                               |
| Ovarian epithelial cancer | over-represented | 0.0338419 | 0.0425634 | 3  | hsa-miR-130b-3p; hsa-miR-145-5p; hsa-miR-205-5p                                                                                                                                                                                                                                                                                                                              |

**Supplementary Table 7.** Physical activity-associated miRNA gene chromosome locus.

| Mirbase id   | Chromosome name | Start position | End position |
|--------------|-----------------|----------------|--------------|
| Glaucous     |                 |                |              |
| hsa-mir-1277 | X               | 118386394      | 118386471    |
| hsa-mir-1307 | 10              | 103394253      | 103394401    |
| hsa-mir-301a | 17              | 59151136       | 59151221     |
| hsa-mir-30d  | 8               | 134804876      | 134804945    |
| hsa-mir-374a | X               | 74287286       | 74287357     |
| hsa-mir-590  | 7               | 74191198       | 74191294     |
| Green        |                 |                |              |
| hsa-mir-122  | 18              | 58451074       | 58451158     |
| hsa-mir-148a | 7               | 25949919       | 25949986     |
| hsa-mir-152  | 17              | 48037161       | 48037247     |
| hsa-mir-192  | 11              | 64891137       | 64891246     |
| hsa-mir-193a | 17              | 31559996       | 31560083     |
| hsa-mir-193b | 16              | 14303967       | 14304049     |
| hsa-mir-27b  | 9               | 95085445       | 95085541     |
| hsa-mir-28   | 3               | 188688781      | 188688866    |
| hsa-mir-3065 | 17              | 81125877       | 81125955     |
| hsa-mir-30d  | 8               | 134804876      | 134804945    |
| hsa-mir-34a  | 1               | 9151668        | 9151777      |
| hsa-mir-378c | 10              | 130962588      | 130962668    |
| hsa-mir-483  | 11              | 2134134        | 2134209      |
| hsa-mir-885  | 3               | 10394489       | 10394562     |
| hsa-mir-95   | 4               | 8005301        | 8005381      |
| Blue         |                 |                |              |
| hsa-let-7b   | 22              | 46113686       | 46113768     |
| hsa-let-7f-2 | X               | 53557192       | 53557274     |
| hsa-mir-1296 | 10              | 63372957       | 63373048     |
| hsa-mir-1306 | 22              | 20086058       | 20086142     |
| hsa-mir-130b | 22              | 21653304       | 21653385     |
| hsa-mir-145  | 5               | 149430646      | 149430733    |
| hsa-mir-15b  | 3               | 160404588      | 160404685    |
| hsa-mir-17   | 13              | 91350605       | 91350688     |

|              |              |           |           |
|--------------|--------------|-----------|-----------|
| hsa-mir-18a  | 13           | 91350751  | 91350821  |
| hsa-mir-1908 | 11           | 61815161  | 61815240  |
| hsa-mir-195  | 17           | 7017615   | 7017701   |
| hsa-mir-204  | 9            | 70809975  | 70810084  |
| hsa-mir-205  | 1            | 209432133 | 209432242 |
| hsa-mir-222  | X            | 45747015  | 45747124  |
| hsa-mir-30b  | 8            | 134800520 | 134800607 |
| hsa-mir-335  | 7            | 130496111 | 130496204 |
| hsa-mir-339  | 7            | 1022933   | 1023026   |
| hsa-mir-33a  | 22           | 41900944  | 41901012  |
| hsa-mir-345  | 14           | 100307859 | 100307956 |
| hsa-mir-365a | 16           | 14309285  | 14309371  |
| hsa-mir-365b | 17           | 31575411  | 31575521  |
| hsa-mir-3679 | 2            | 134127125 | 134127192 |
| hsa-mir-421  | X            | 74218377  | 74218461  |
| hsa-mir-425  | 3            | 49020148  | 49020234  |
| hsa-mir-450b | X            | 134540185 | 134540262 |
| hsa-mir-454  | 17           | 59137758  | 59137872  |
| hsa-mir-483  | 11           | 2134134   | 2134209   |
| hsa-mir-491  | 9            | 20716105  | 20716188  |
| hsa-mir-505  | X            | 139924148 | 139924231 |
| hsa-mir-532  | X            | 50003148  | 50003238  |
| hsa-mir-548z | 12           | 64622509  | 64622605  |
| hsa-mir-628  | 15           | 55372940  | 55373034  |
| hsa-mir-664a | 1            | 220200538 | 220200619 |
| hsa-mir-7-1  | 9            | 83969748  | 83969857  |
| hsa-mir-766  | HG2541_PATCH | 97740     | 97850     |
| hsa-mir-766  | X            | 119646738 | 119646848 |



### 3. Supplementary Figures

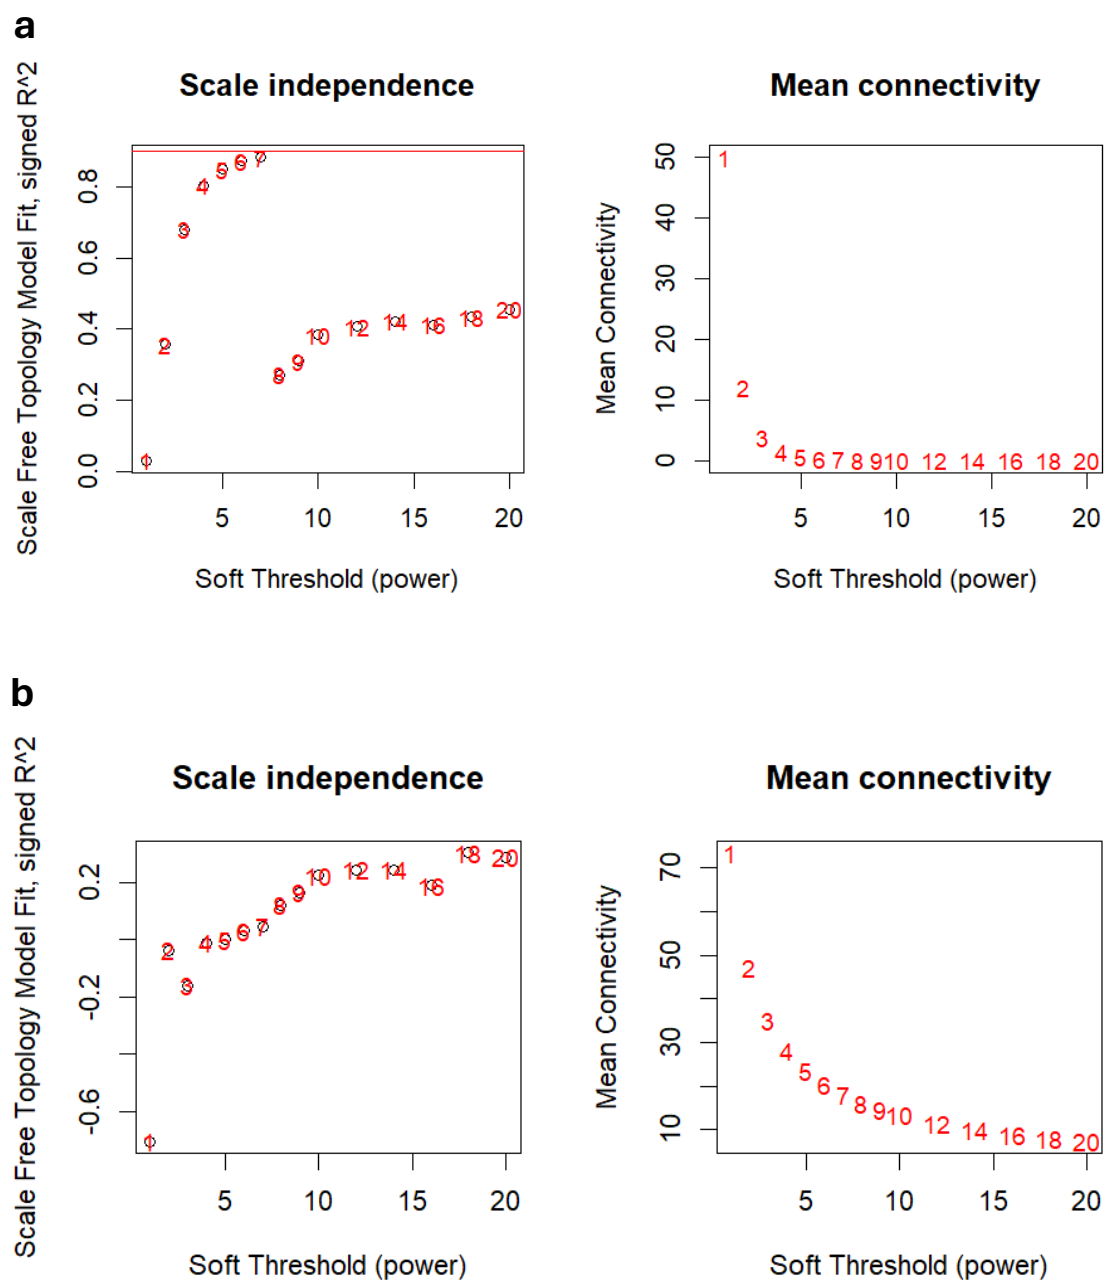

**Supplementary Fig. 1.** Selection of soft-thresholding power for weighted gene co-expression network analysis (WGCNA) for a) circulating microRNAs and b) circulating metabolites. The left panel shows the scale-free topology model fit (signed  $R^2$ ) as a function of the soft-thresholding power. A threshold of  $R^2 > 0.9$  (red horizontal line) indicates approximate scale-free topology. The right panel displays mean connectivity (average degree) for each power.

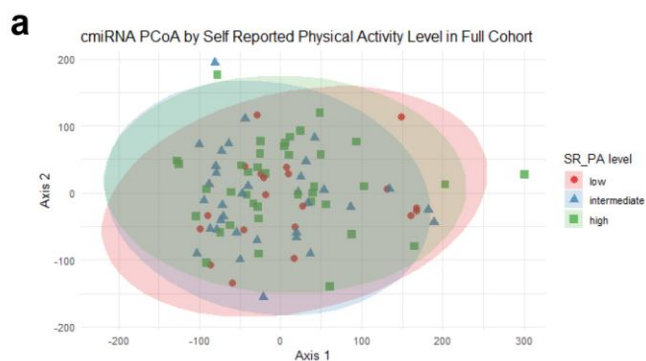

| Difference in the full cohort groups' PCoA distance matrix |             |             |
|------------------------------------------------------------|-------------|-------------|
| SR-PA                                                      | PERMANOVA   | ANOSIM      |
| low-intermediate-high                                      | $p = 0.390$ | $p = 0.217$ |
| low-intermediate                                           | $p = 0.324$ | $p = 0.212$ |
| low-high                                                   | $p = 0.501$ | $p = 0.232$ |
| intermediate-high                                          | $p = 0.315$ | $p = 0.432$ |

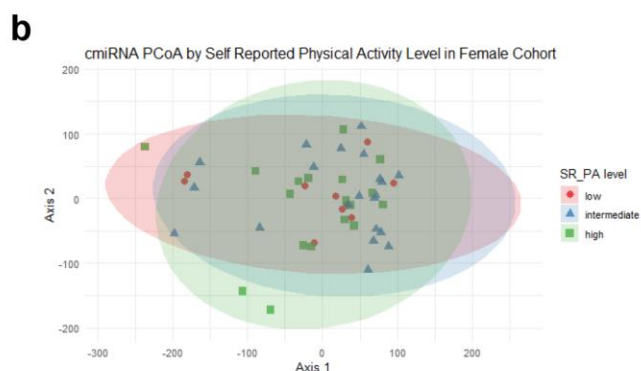

| Difference in the female groups' PCoA distance matrix |             |             |
|-------------------------------------------------------|-------------|-------------|
| SR-PA                                                 | PERMANOVA   | ANOSIM      |
| low-intermediate-high                                 | $p = 0.502$ | $p = 0.470$ |
| low-intermediate                                      | $p = 0.382$ | $p = 0.491$ |
| low-high                                              | $p = 0.790$ | $p = 0.638$ |
| intermediate-high                                     | $p = 0.327$ | $p = 0.326$ |

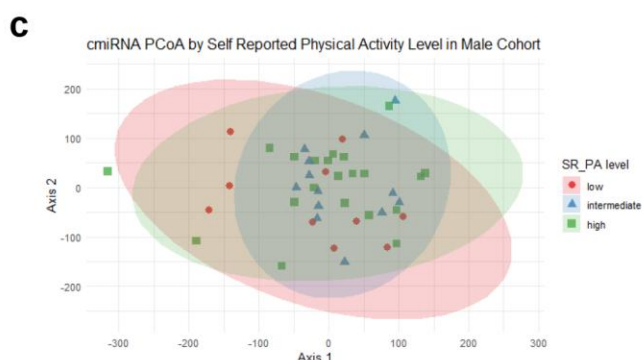

| Difference in the male groups' PCoA distance matrix |             |             |
|-----------------------------------------------------|-------------|-------------|
| SR-PA                                               | PERMANOVA   | ANONIM      |
| low-intermediate-high                               | $p = 0.744$ | $p = 0.279$ |
| low-intermediate                                    | $p = 0.443$ | $p = 0.148$ |
| low-high                                            | $p = 0.694$ | $p = 0.154$ |
| intermediate-high                                   | $p = 0.747$ | $p = 0.715$ |

**Supplementary Fig. 2.** Differences in circulating microRNA profiles between self-reported physical activity (SR-PA) groups. Principal coordinates analysis (PCoA) was used to study and visualize differences in microRNA expression among participants categorized into low, intermediate, and high physical activity groups in a) full, b) female and c) male cohort. Group differences were statistically assessed using PERMANOVA which tests whether the centroids of groups are significantly different in multivariate space, and ANOSIM, which compares within-group vs between-group distances to see if samples are more similar within groups than between them.

### Physical activity-associated c-miRNA modules by sex

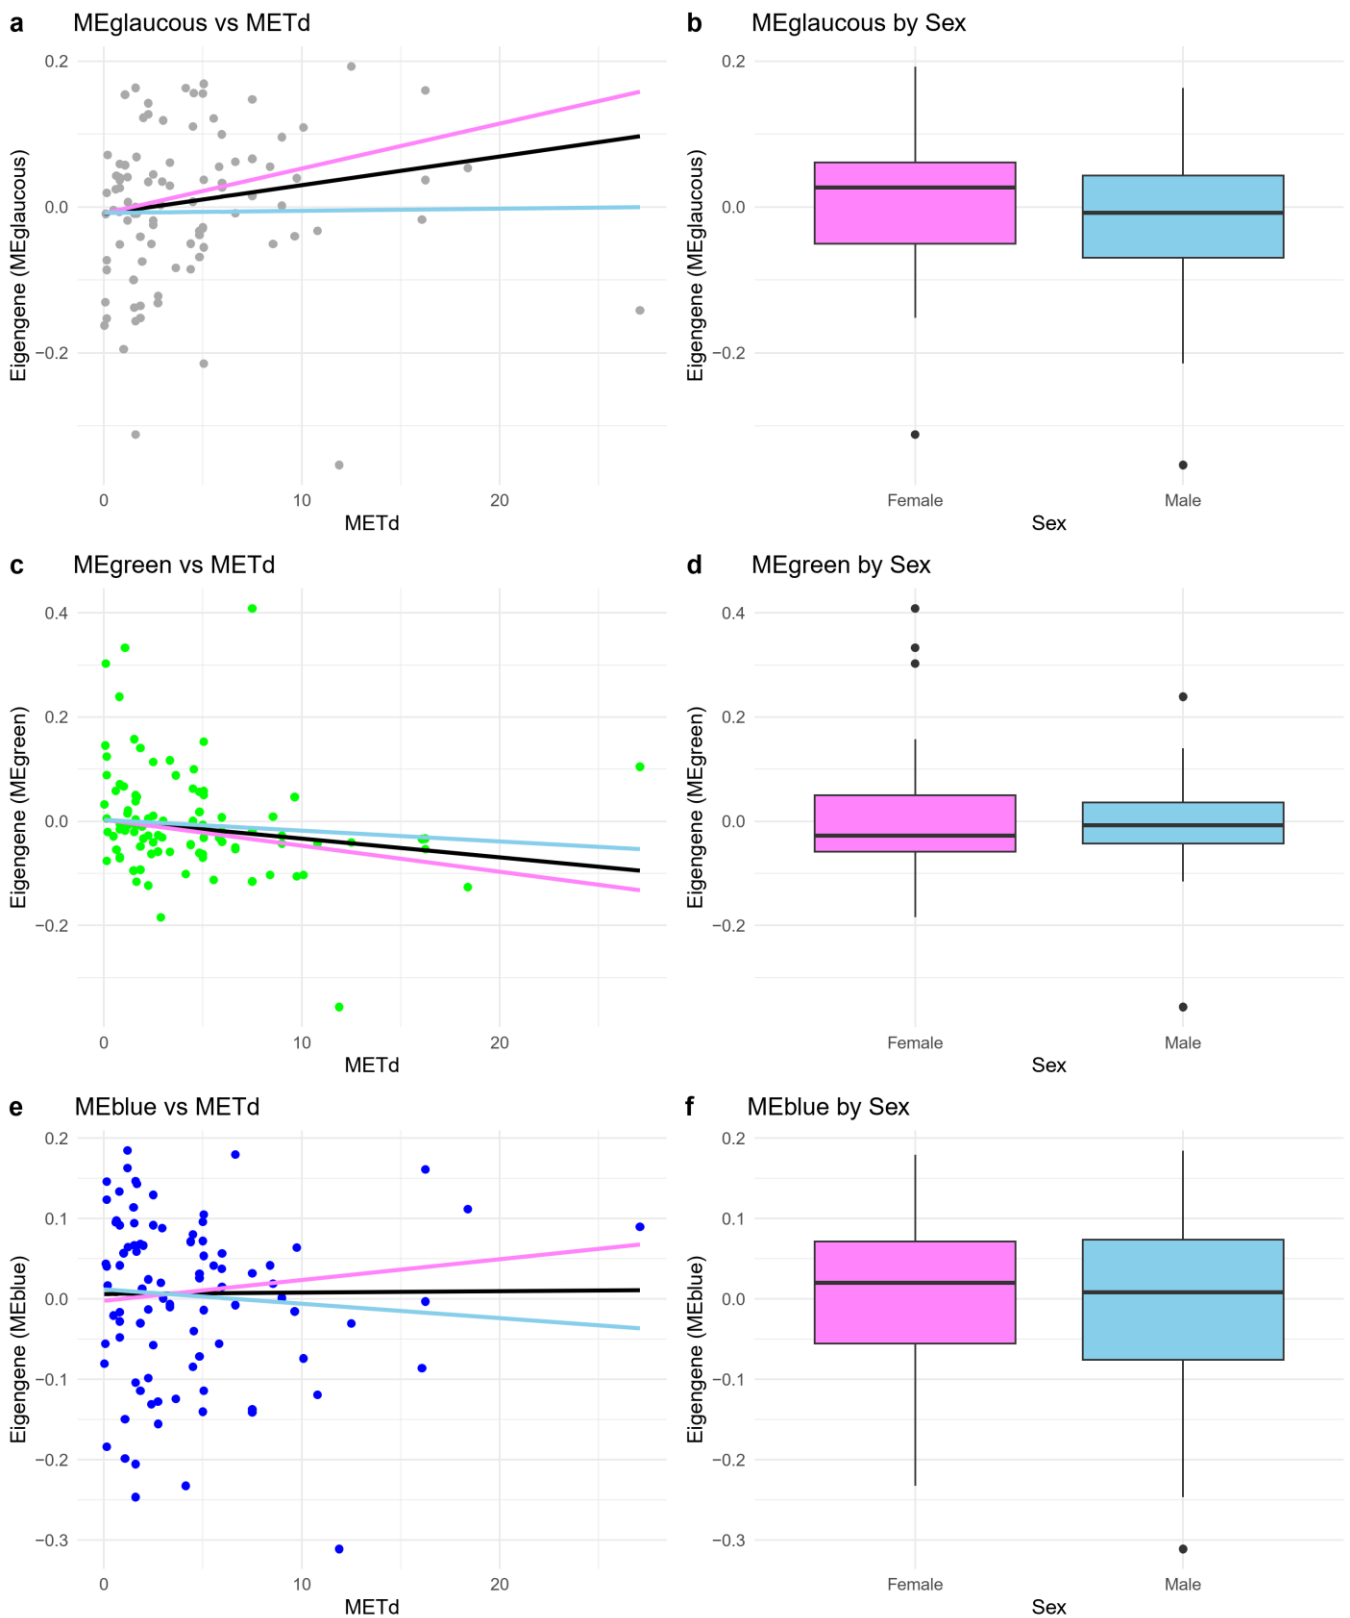

**Supplementary Fig. 3.** Associations between physical activity and circulating microRNA module eigengenes (ME), stratified by sex. Scatter plots (left) and boxplots (right) illustrate the distribution of module eigengenes (MEglaucaous, MEgreen, and MEblue) in relation to daily metabolic equivalents (METd) and sex. Robust linear regression lines are overlaid on the scatter plots to visualize trends across all participants (black), females (pink), and males (blue). Panels a–f show results for MEglaucaous, MEgreen, and MEblue, respectively. Boxplots display module eigengene distributions by sex. These plots highlight potential sex-specific trends in the relationship between physical activity and microRNA module expression.

# Physical activity-associated c-Metab modules by sex

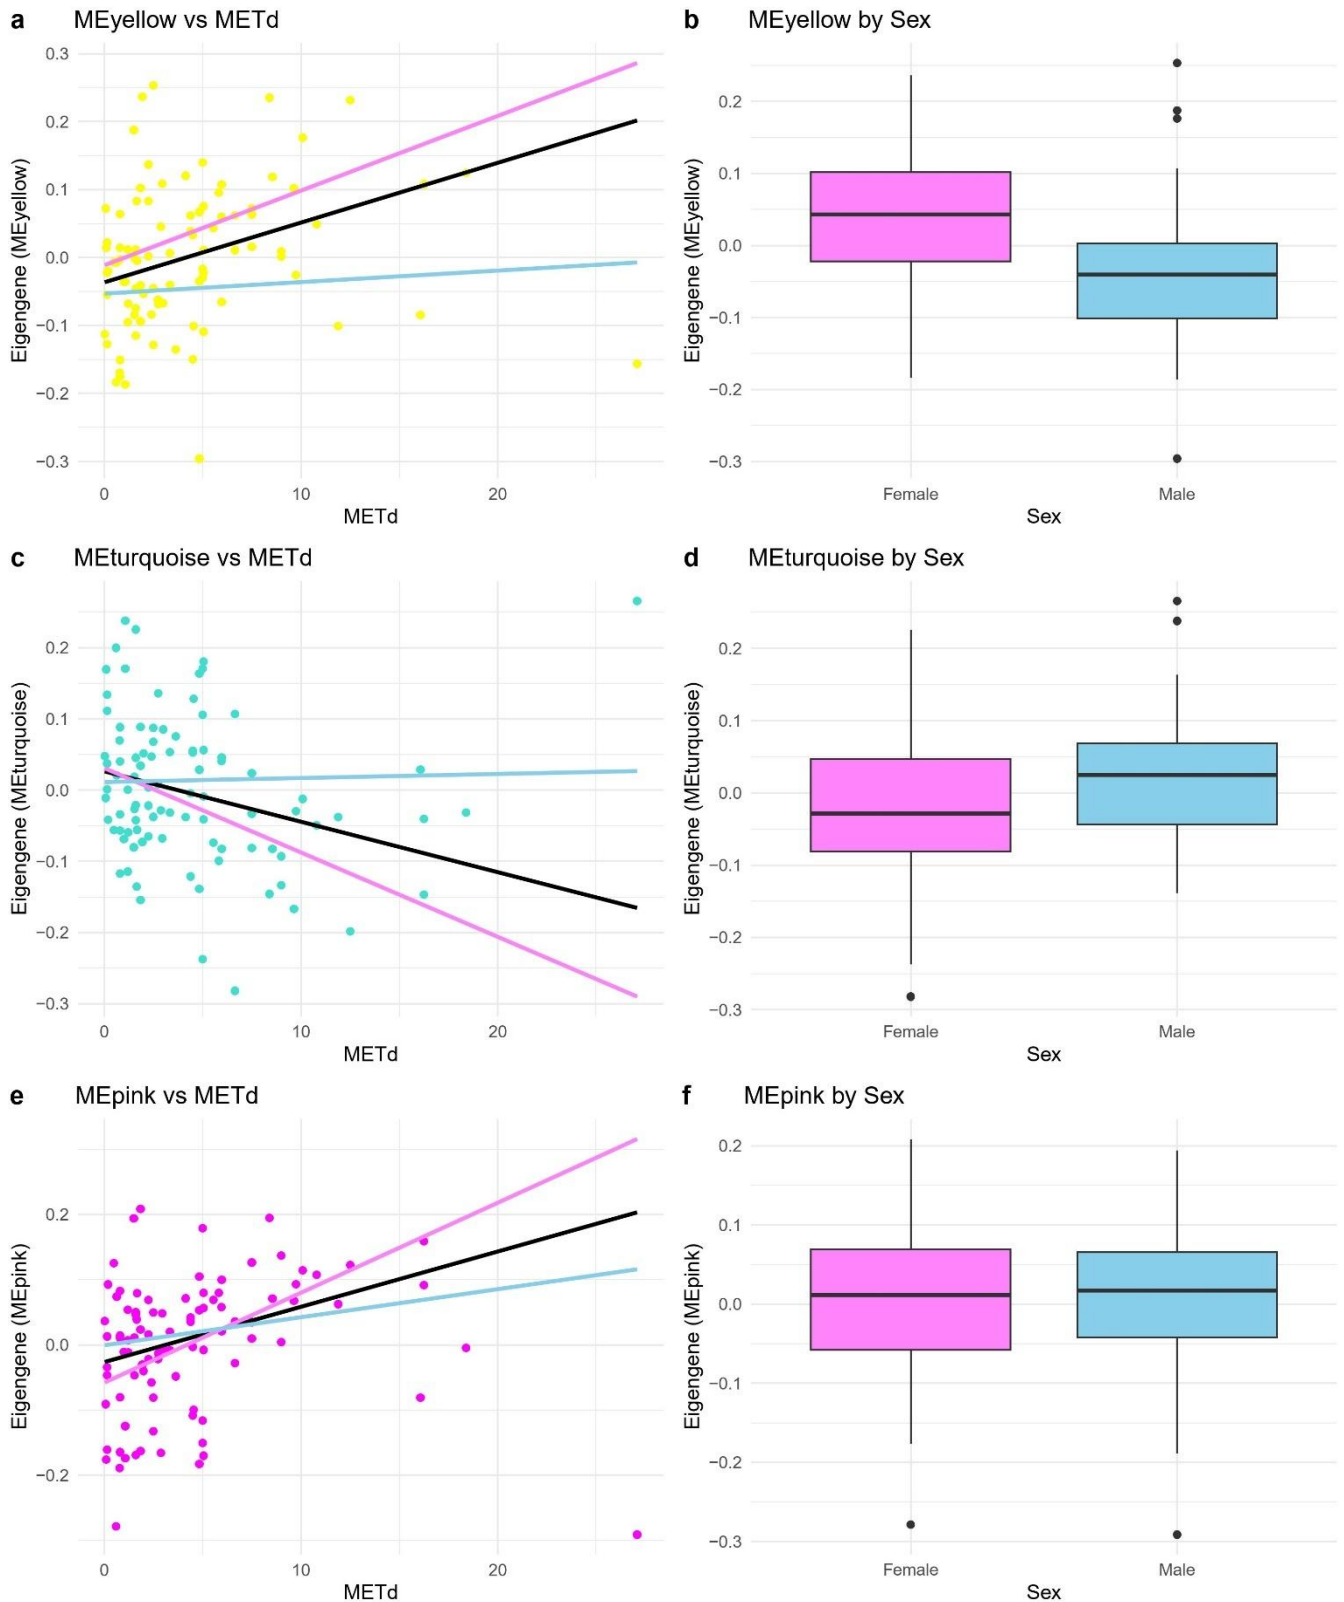

**Supplementary Fig. 4.** Associations between physical activity and circulating metabolite module eigengenes (ME), stratified by sex. Scatter plots (left) and boxplots (right) illustrate the distribution of module eigengenes (MEyellow, METurquoise, and MEpink) in relation to daily metabolic equivalents (METd) and sex. Robust linear regression lines are overlaid on the scatter plots to visualize trends across all participants (black), females (pink), and males (blue). Panels a–f show results for MEyellow, METurquoise, and MEpink, respectively. Boxplots display module eigengene distributions by sex. These plots highlight potential sex-specific trends in the relationship between physical activity and metabolite module levels.

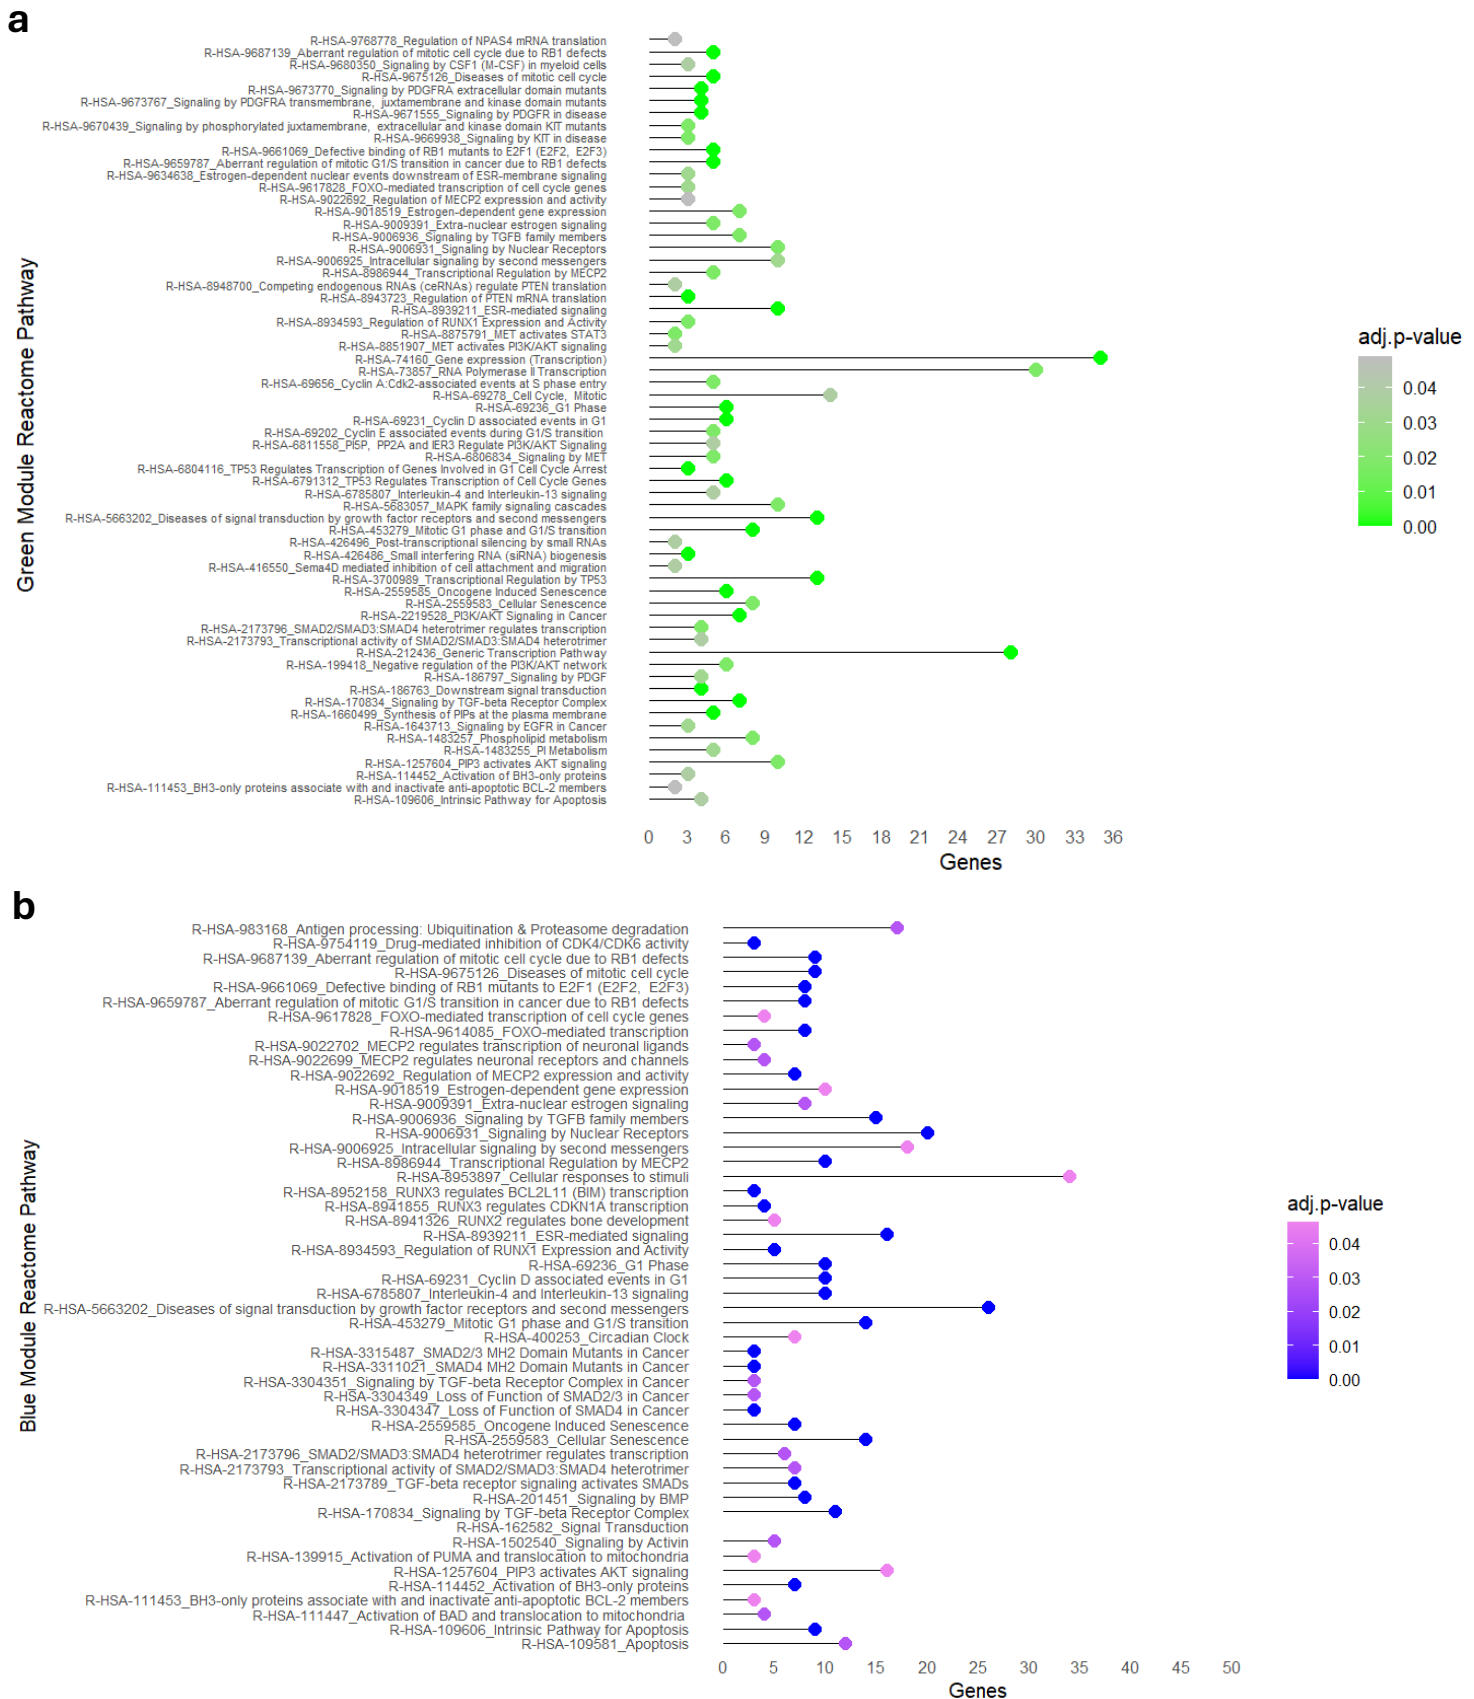

Supplement: Supplementary file 1 [file c515bad9d0e4aa95cfa8d261.pdf]
