# Supplementary material for: Sex-based differences in circulating microRNA and metabolite signatures associated with physical activity in Lynch Syndrome carriers
Source: Research Square preprint supplement (doi:10.21203/rs.3.rs-7432623/v1), 2025-09-30
Supplement: Supplementary file 1 [file ab973f7de39b2f916bda51df.xlsx]

## Sheet: Content
Sheet name	Content
Additional_table 1	Metabolite annotations
Additional_table 2	Circulating microRNA modules from WGCNA
Additional_table 3	Circulating metabolite modules from WGCNA
Additional_table 4	Biweighted midcorrelation of PA-associated module biomarkers in full cohort
Additional_table 5	Biweighted midcorrelation of PA-associated module biomarkers in female cohort
Additional_table 6	Biweighted midcorrelation of PA-associated module biomarkers in male cohort
Additional_table 7	MEglaucous microRNAs over-presented in cancer
Additional_table 8	Megreen microRNAs over-presented in cancer
Additional_table 9	MEblue microRNAs over-presented in cancer
Additional_table 10	miRWalk GSEA Glaucous module reactome pathway
Additional_table 11	miRWalk GSEA Green module reactome pathway
Additional_table 12	miRWalk GSEA Blue module reactome pathway
Additional_table 13	rCCA biomarkers female
Additional_table 14	rCCA biomarkers male

## Sheet: ATable 1
Annotations	Biomarker name	Unit	Group
Total_C	Total cholesterol	mmol/l	Cholesterol
non_HDL_C	Total cholesterol minus HDL-C	mmol/l	Cholesterol
Remnant_C	Remnant cholesterol (non-HDL, non-LDL -cholesterol)	mmol/l	Cholesterol
VLDL_C	VLDL cholesterol	mmol/l	Cholesterol
Clinical_LDL_C	Clinical LDL cholesterol	mmol/l	Cholesterol
LDL_C	LDL cholesterol	mmol/l	Cholesterol
HDL_C	HDL cholesterol	mmol/l	Cholesterol
Total_TG	Total triglycerides	mmol/l	Triglycerides
VLDL_TG	Triglycerides in VLDL	mmol/l	Triglycerides
LDL_TG	Triglycerides in LDL	mmol/l	Triglycerides
HDL_TG	Triglycerides in HDL	mmol/l	Triglycerides
Total_PL	Total phospholipids in lipoprotein particles	mmol/l	Phospholipids
VLDL_PL	Phospholipids in VLDL	mmol/l	Phospholipids
LDL_PL	Phospholipids in LDL	mmol/l	Phospholipids
HDL_PL	Phospholipids in HDL	mmol/l	Phospholipids
Total_CE	Total esterified cholesterol	mmol/l	Cholesteryl esters
VLDL_CE	Cholesteryl esters in VLDL	mmol/l	Cholesteryl esters
LDL_CE	Cholesteryl esters in LDL	mmol/l	Cholesteryl esters
HDL_CE	Cholesteryl esters in HDL	mmol/l	Cholesteryl esters
Total_FC	Total free cholesterol	mmol/l	Free cholesterol
VLDL_FC	Free cholesterol in VLDL	mmol/l	Free cholesterol
LDL_FC	Free cholesterol in LDL	mmol/l	Free cholesterol
HDL_FC	Free cholesterol in HDL	mmol/l	Free cholesterol
Total_L	Total lipids in lipoprotein particles	mmol/l	Total lipids
VLDL_L	Total lipids in VLDL	mmol/l	Total lipids
LDL_L	Total lipids in LDL	mmol/l	Total lipids
HDL_L	Total lipids in HDL	mmol/l	Total lipids
Total_P	Total concentration of lipoprotein particles	mmol/l	Lipoprotein particle concentrations
VLDL_P	Concentration of VLDL particles	mmol/l	Lipoprotein particle concentrations
LDL_P	Concentration of LDL particles	mmol/l	Lipoprotein particle concentrations
HDL_P	Concentration of HDL particles	mmol/l	Lipoprotein particle concentrations
VLDL_size	Average diameter for VLDL particles	nm	Lipoprotein particle sizes
LDL_size	Average diameter for LDL particles	nm	Lipoprotein particle sizes
HDL_size	Average diameter for HDL particles	nm	Lipoprotein particle sizes
Phosphoglyc	Phosphoglycerides	mmol/l	Other lipids
TG_by_PG	Ratio of triglycerides to phosphoglycerides	ratio	Other lipids
Cholines	Total cholines	mmol/l	Other lipids
Phosphatidylc	Phosphatidylcholines	mmol/l	Other lipids
Sphingomyelins	Sphingomyelins	mmol/l	Other lipids
ApoB	Apolipoprotein B	g/l	Apolipoproteins
ApoA1	Apolipoprotein A1	g/l	Apolipoproteins
ApoB_by_ApoA1	Ratio of apolipoprotein B to apolipoprotein A1	ratio	Apolipoproteins
Total_FA	Total fatty acids	mmol/l	Fatty acids
Unsaturation	Degree of unsaturation	degree	Fatty acids
Omega_3_pct	Ratio of omega-3 fatty acids to total fatty acids	%	Fatty acids
Omega_6_pct	Ratio of omega-6 fatty acids to total fatty acids	%	Fatty acids
PUFA_pct	Ratio of polyunsaturated fatty acids to total fatty acids	%	Fatty acids
MUFA_pct	Ratio of monounsaturated fatty acids to total fatty acids	%	Fatty acids
SFA_pct	Ratio of saturated fatty acids to total fatty acids	%	Fatty acids
LA_pct	Ratio of linoleic acid to total fatty acids	%	Fatty acids
DHA_pct	Ratio of docosahexaenoic acid to total fatty acids	%	Fatty acids
PUFA_by_MUFA	Ratio of polyunsaturated fatty acids to monounsaturated fatty acids	ratio	Fatty acids
Omega_6_by_Omega_3	Ratio of omega-6 fatty acids to omega-3 fatty acids	ratio	Fatty acids
Ala	Alanine	mmol/l	Amino acids
Gln	Glutamine	mmol/l	Amino acids
Gly	Glycine	mmol/l	Amino acids
His	Histidine	mmol/l	Amino acids
Total_BCAA	Total concentration of branched-chain amino acids (leucine + isoleucine + valine)	mmol/l	Amino acids
Ile	Isoleucine	mmol/l	Amino acids
Leu	Leucine	mmol/l	Amino acids
Val	Valine	mmol/l	Amino acids
Phe	Phenylalanine	mmol/l	Amino acids
Tyr	Tyrosine	mmol/l	Amino acids
Glucose	Glucose	mmol/l	Glycolysis related metabolites
Lactate	Lactate	mmol/l	Glycolysis related metabolites
Pyruvate	Pyruvate	mmol/l	Glycolysis related metabolites
Citrate	Citrate	mmol/l	Glycolysis related metabolites
Glycerol	Glycerol	mmol/l	Glycolysis related metabolites
bOHbutyrate	3-Hydroxybutyrate	mmol/l	Ketone bodies
Acetate	Acetate	mmol/l	Ketone bodies
Acetoacetate	Acetoacetate	mmol/l	Ketone bodies
Acetone	Acetone	mmol/l	Ketone bodies
Creatinine	Creatinine	μmol/l	Fluid balance
Albumin	Albumin	g/l	Fluid balance
GlycA	Glycoprotein acetyls	mmol/l	Inflammation
XXL_VLDL_P	Concentration of chylomicrons and extremely large VLDL particles	mmol/l	Lipoprotein subclasses
XXL_VLDL_L	Total lipids in chylomicrons and extremely large VLDL	mmol/l	Lipoprotein subclasses
XXL_VLDL_PL	Phospholipids in chylomicrons and extremely large VLDL	mmol/l	Lipoprotein subclasses
XXL_VLDL_C	Cholesterol in chylomicrons and extremely large VLDL	mmol/l	Lipoprotein subclasses
XXL_VLDL_CE	Cholesteryl esters in chylomicrons and extremely large VLDL	mmol/l	Lipoprotein subclasses
XXL_VLDL_FC	Free cholesterol in chylomicrons and extremely large VLDL	mmol/l	Lipoprotein subclasses
XXL_VLDL_TG	Triglycerides in chylomicrons and extremely large VLDL	mmol/l	Lipoprotein subclasses
XL_VLDL_P	Concentration of very large VLDL particles	mmol/l	Lipoprotein subclasses
XL_VLDL_L	Total lipids in very large VLDL	mmol/l	Lipoprotein subclasses
XL_VLDL_PL	Phospholipids in very large VLDL	mmol/l	Lipoprotein subclasses
XL_VLDL_C	Cholesterol in very large VLDL	mmol/l	Lipoprotein subclasses
XL_VLDL_CE	Cholesteryl esters in very large VLDL	mmol/l	Lipoprotein subclasses
XL_VLDL_FC	Free cholesterol in very large VLDL	mmol/l	Lipoprotein subclasses
XL_VLDL_TG	Triglycerides in very large VLDL	mmol/l	Lipoprotein subclasses
L_VLDL_P	Concentration of large VLDL particles	mmol/l	Lipoprotein subclasses
L_VLDL_L	Total lipids in large VLDL	mmol/l	Lipoprotein subclasses
L_VLDL_PL	Phospholipids in large VLDL	mmol/l	Lipoprotein subclasses
L_VLDL_C	Cholesterol in large VLDL	mmol/l	Lipoprotein subclasses
L_VLDL_CE	Cholesteryl esters in large VLDL	mmol/l	Lipoprotein subclasses
L_VLDL_FC	Free cholesterol in large VLDL	mmol/l	Lipoprotein subclasses
L_VLDL_TG	Triglycerides in large VLDL	mmol/l	Lipoprotein subclasses
M_VLDL_P	Concentration of medium VLDL particles	mmol/l	Lipoprotein subclasses
M_VLDL_L	Total lipids in medium VLDL	mmol/l	Lipoprotein subclasses
M_VLDL_PL	Phospholipids in medium VLDL	mmol/l	Lipoprotein subclasses
M_VLDL_C	Cholesterol in medium VLDL	mmol/l	Lipoprotein subclasses
M_VLDL_CE	Cholesteryl esters in medium VLDL	mmol/l	Lipoprotein subclasses
M_VLDL_FC	Free cholesterol in medium VLDL	mmol/l	Lipoprotein subclasses
M_VLDL_TG	Triglycerides in medium VLDL	mmol/l	Lipoprotein subclasses
S_VLDL_P	Concentration of small VLDL particles	mmol/l	Lipoprotein subclasses
S_VLDL_L	Total lipids in small VLDL	mmol/l	Lipoprotein subclasses
S_VLDL_PL	Phospholipids in small VLDL	mmol/l	Lipoprotein subclasses
S_VLDL_C	Cholesterol in small VLDL	mmol/l	Lipoprotein subclasses
S_VLDL_CE	Cholesteryl esters in small VLDL	mmol/l	Lipoprotein subclasses
S_VLDL_FC	Free cholesterol in small VLDL	mmol/l	Lipoprotein subclasses
S_VLDL_TG	Triglycerides in small VLDL	mmol/l	Lipoprotein subclasses
XS_VLDL_P	Concentration of very small VLDL particles	mmol/l	Lipoprotein subclasses
XS_VLDL_L	Total lipids in very small VLDL	mmol/l	Lipoprotein subclasses
XS_VLDL_PL	Phospholipids in very small VLDL	mmol/l	Lipoprotein subclasses
XS_VLDL_C	Cholesterol in very small VLDL	mmol/l	Lipoprotein subclasses
XS_VLDL_CE	Cholesteryl esters in very small VLDL	mmol/l	Lipoprotein subclasses
XS_VLDL_FC	Free cholesterol in very small VLDL	mmol/l	Lipoprotein subclasses
XS_VLDL_TG	Triglycerides in very small VLDL	mmol/l	Lipoprotein subclasses
IDL_P	Concentration of IDL particles	mmol/l	Lipoprotein subclasses
IDL_L	Total lipids in IDL	mmol/l	Lipoprotein subclasses
IDL_PL	Phospholipids in IDL	mmol/l	Lipoprotein subclasses
IDL_C	Cholesterol in IDL	mmol/l	Lipoprotein subclasses
IDL_CE	Cholesteryl esters in IDL	mmol/l	Lipoprotein subclasses
IDL_FC	Free cholesterol in IDL	mmol/l	Lipoprotein subclasses
IDL_TG	Triglycerides in IDL	mmol/l	Lipoprotein subclasses
L_LDL_P	Concentration of large LDL particles	mmol/l	Lipoprotein subclasses
L_LDL_L	Total lipids in large LDL	mmol/l	Lipoprotein subclasses
L_LDL_PL	Phospholipids in large LDL	mmol/l	Lipoprotein subclasses
L_LDL_C	Cholesterol in large LDL	mmol/l	Lipoprotein subclasses
L_LDL_CE	Cholesteryl esters in large LDL	mmol/l	Lipoprotein subclasses
L_LDL_FC	Free cholesterol in large LDL	mmol/l	Lipoprotein subclasses
L_LDL_TG	Triglycerides in large LDL	mmol/l	Lipoprotein subclasses
M_LDL_P	Concentration of medium LDL particles	mmol/l	Lipoprotein subclasses
M_LDL_L	Total lipids in medium LDL	mmol/l	Lipoprotein subclasses
M_LDL_PL	Phospholipids in medium LDL	mmol/l	Lipoprotein subclasses
M_LDL_C	Cholesterol in medium LDL	mmol/l	Lipoprotein subclasses
M_LDL_CE	Cholesteryl esters in medium LDL	mmol/l	Lipoprotein subclasses
M_LDL_FC	Free cholesterol in medium LDL	mmol/l	Lipoprotein subclasses
M_LDL_TG	Triglycerides in medium LDL	mmol/l	Lipoprotein subclasses
S_LDL_P	Concentration of small LDL particles	mmol/l	Lipoprotein subclasses
S_LDL_L	Total lipids in small LDL	mmol/l	Lipoprotein subclasses
S_LDL_PL	Phospholipids in small LDL	mmol/l	Lipoprotein subclasses
S_LDL_C	Cholesterol in small LDL	mmol/l	Lipoprotein subclasses
S_LDL_CE	Cholesteryl esters in small LDL	mmol/l	Lipoprotein subclasses
S_LDL_FC	Free cholesterol in small LDL	mmol/l	Lipoprotein subclasses
S_LDL_TG	Triglycerides in small LDL	mmol/l	Lipoprotein subclasses
XL_HDL_P	Concentration of very large HDL particles	mmol/l	Lipoprotein subclasses
XL_HDL_L	Total lipids in very large HDL	mmol/l	Lipoprotein subclasses
XL_HDL_PL	Phospholipids in very large HDL	mmol/l	Lipoprotein subclasses
XL_HDL_C	Cholesterol in very large HDL	mmol/l	Lipoprotein subclasses
XL_HDL_CE	Cholesteryl esters in very large HDL	mmol/l	Lipoprotein subclasses
XL_HDL_FC	Free cholesterol in very large HDL	mmol/l	Lipoprotein subclasses
XL_HDL_TG	Triglycerides in very large HDL	mmol/l	Lipoprotein subclasses
L_HDL_P	Concentration of large HDL particles	mmol/l	Lipoprotein subclasses
L_HDL_L	Total lipids in large HDL	mmol/l	Lipoprotein subclasses
L_HDL_PL	Phospholipids in large HDL	mmol/l	Lipoprotein subclasses
L_HDL_C	Cholesterol in large HDL	mmol/l	Lipoprotein subclasses
L_HDL_CE	Cholesteryl esters in large HDL	mmol/l	Lipoprotein subclasses
L_HDL_FC	Free cholesterol in large HDL	mmol/l	Lipoprotein subclasses
L_HDL_TG	Triglycerides in large HDL	mmol/l	Lipoprotein subclasses
M_HDL_P	Concentration of medium HDL particles	mmol/l	Lipoprotein subclasses
M_HDL_L	Total lipids in medium HDL	mmol/l	Lipoprotein subclasses
M_HDL_PL	Phospholipids in medium HDL	mmol/l	Lipoprotein subclasses
M_HDL_C	Cholesterol in medium HDL	mmol/l	Lipoprotein subclasses
M_HDL_CE	Cholesteryl esters in medium HDL	mmol/l	Lipoprotein subclasses
M_HDL_FC	Free cholesterol in medium HDL	mmol/l	Lipoprotein subclasses
M_HDL_TG	Triglycerides in medium HDL	mmol/l	Lipoprotein subclasses
S_HDL_P	Concentration of small HDL particles	mmol/l	Lipoprotein subclasses
S_HDL_L	Total lipids in small HDL	mmol/l	Lipoprotein subclasses
S_HDL_PL	Phospholipids in small HDL	mmol/l	Lipoprotein subclasses
S_HDL_C	Cholesterol in small HDL	mmol/l	Lipoprotein subclasses
S_HDL_CE	Cholesteryl esters in small HDL	mmol/l	Lipoprotein subclasses
S_HDL_FC	Free cholesterol in small HDL	mmol/l	Lipoprotein subclasses
S_HDL_TG	Triglycerides in small HDL	mmol/l	Lipoprotein subclasses

## Sheet: ATable 2
black	blue	brown	cyan	green	greenyellow	grey	glaucous	lightcyan	lightgreen	magenta	midnightblue	pink	purple	red	salmon	tan	turquoise	yellow
hsa-let-7e-5p	hsa-miR-1306-5p	hsa-let-7a-3p	hsa-miR-10a-5p	hsa-miR-122-5p	hsa-miR-106b-5p	hsa-miR-103a-3p	hsa-miR-1277-5p	hsa-miR-1301-3p	hsa-miR-548au-5p	hsa-let-7a-5p	hsa-miR-140-5p	hsa-miR-132-3p	hsa-miR-101-3p	hsa-let-7d-3p	hsa-miR-106a-5p	hsa-let-7d-5p	hsa-miR-11400	hsa-miR-126-5p
hsa-miR-126-3p	hsa-miR-130b-3p	hsa-let-7i-3p	hsa-miR-10b-5p	hsa-miR-125b-5p	hsa-miR-107	hsa-miR-10527-5p	hsa-miR-1307-5p	hsa-miR-130a-3p	hsa-miR-548o-5p	hsa-let-7b-5p	hsa-miR-223-3p	hsa-miR-181a-5p	hsa-miR-106b-3p	hsa-miR-125a-5p	hsa-miR-3615	hsa-let-7g-5p	hsa-miR-1304-3p	hsa-miR-1-3p
hsa-miR-1307-3p	hsa-miR-145-5p	hsa-miR-1180-3p	hsa-miR-141-3p	hsa-miR-128-3p	hsa-miR-144-3p	hsa-miR-1277-3p	hsa-miR-26a-5p	hsa-miR-197-3p	hsa-miR-548am-5p	hsa-let-7c-5p	hsa-miR-23b-3p	hsa-miR-181b-5p	hsa-miR-182-5p	hsa-miR-150-3p	hsa-miR-548ad-5p	hsa-miR-1255b-5p	hsa-miR-134-5p	hsa-miR-142-5p
hsa-miR-142-3p	hsa-miR-15b-3p	hsa-miR-1294	hsa-miR-196a-5p	hsa-miR-146b-3p	hsa-miR-15a-5p	hsa-miR-1299	hsa-miR-301a-3p	hsa-miR-361-5p	hsa-miR-548c-5p	hsa-let-7f-5p	hsa-miR-24-3p	hsa-miR-181c-5p	hsa-miR-183-5p	hsa-miR-150-5p	hsa-miR-548ae-5p	hsa-miR-140-3p	hsa-miR-139-3p	hsa-miR-143-3p
hsa-miR-146a-5p	hsa-miR-15b-5p	hsa-miR-185-3p	hsa-miR-200a-3p	hsa-miR-148a-3p	hsa-miR-186-5p	hsa-miR-17-3p	hsa-miR-374a-5p	hsa-miR-374b-5p	hsa-miR-10a-3p	hsa-let-7i-5p	hsa-miR-3135b	hsa-miR-221-3p	hsa-miR-190a-5p	hsa-miR-191-5p	hsa-miR-548ay-5p	hsa-miR-16-5p	hsa-miR-146b-5p	hsa-miR-144-5p
hsa-miR-148b-3p	hsa-miR-17-5p	hsa-miR-185-5p	hsa-miR-200b-3p	hsa-miR-152-3p	hsa-miR-19a-3p	hsa-miR-181d-5p	hsa-miR-590-3p	hsa-miR-4433b-5p		hsa-miR-155-5p	hsa-miR-328-3p	hsa-miR-320b	hsa-miR-25-3p	hsa-miR-199b-5p	hsa-miR-548d-5p	hsa-miR-196b-5p	hsa-miR-151a-5p	hsa-miR-206
hsa-miR-151a-3p	hsa-miR-18a-5p	hsa-miR-18a-3p	hsa-miR-200c-3p	hsa-miR-192-5p	hsa-miR-19b-3p	hsa-miR-190b-5p	hsa-miR-30d-3p	hsa-miR-671-5p		hsa-miR-423-5p	hsa-miR-625-3p	hsa-miR-320c	hsa-miR-26b-5p	hsa-miR-223-5p	hsa-miR-942-5p	hsa-miR-324-5p	hsa-miR-154-5p	hsa-miR-21-5p
hsa-miR-199a-3p	hsa-miR-1908-5p	hsa-miR-20a-5p	hsa-miR-215-5p	hsa-miR-193a-5p	hsa-miR-20b-5p	hsa-miR-2355-3p				hsa-miR-454-3p	hsa-miR-99b-5p	hsa-miR-378a-3p	hsa-miR-532-5p	hsa-miR-23a-3p	hsa-miR-589-5p	hsa-miR-4732-3p	hsa-miR-181a-2-3p	hsa-miR-27a-3p
hsa-miR-199a-5p	hsa-miR-195-5p	hsa-miR-2110	hsa-miR-375-3p	hsa-miR-193b-5p	hsa-miR-32-5p	hsa-miR-26b-3p				hsa-miR-574-5p	hsa-miR-1273h-3p	hsa-miR-423-3p	hsa-miR-660-5p	hsa-miR-29b-3p	hsa-miR-378a-5p	hsa-miR-4732-5p	hsa-miR-181a-3p	hsa-miR-29a-3p
hsa-miR-199b-3p	hsa-miR-204-5p	hsa-miR-22-3p		hsa-miR-194-5p	hsa-miR-3613-5p	hsa-miR-340-3p				hsa-miR-664b-5p		hsa-miR-425-5p	hsa-miR-7-5p	hsa-miR-331-3p	hsa-miR-7706	hsa-miR-503-5p	hsa-miR-221-5p	hsa-miR-29c-3p
hsa-miR-224-5p	hsa-miR-205-5p	hsa-miR-22-5p		hsa-miR-27b-3p	hsa-miR-651-5p	hsa-miR-374b-3p				hsa-miR-98-5p		hsa-miR-99a-5p	hsa-miR-93-5p	hsa-miR-335-5p		hsa-miR-629-5p	hsa-miR-26a-1-3p	hsa-miR-30a-3p
hsa-miR-4446-3p	hsa-miR-222-3p	hsa-miR-29c-5p		hsa-miR-28-3p		hsa-miR-3960				hsa-miR-6721-5p		hsa-miR-100-5p		hsa-miR-342-3p			hsa-miR-28-5p	hsa-miR-30a-5p
hsa-miR-584-5p	hsa-miR-30b-5p	hsa-miR-3158-3p		hsa-miR-3065-5p		hsa-miR-429						hsa-miR-148a-5p		hsa-miR-361-3p			hsa-miR-337-5p	hsa-miR-30e-3p
hsa-miR-744-5p	hsa-miR-30c-5p	hsa-miR-320a-3p		hsa-miR-30d-5p		hsa-miR-4662a-5p								hsa-miR-424-5p			hsa-miR-370-3p	hsa-miR-30e-5p
hsa-miR-766-5p	hsa-miR-335-3p	hsa-miR-324-3p		hsa-miR-34a-5p		hsa-miR-497-5p								hsa-miR-574-3p			hsa-miR-381-3p	hsa-miR-338-3p
	hsa-miR-339-3p	hsa-miR-363-3p		hsa-miR-378c		hsa-miR-542-3p								hsa-miR-145-3p			hsa-miR-382-5p	hsa-miR-340-5p
	hsa-miR-339-5p	hsa-miR-451a		hsa-miR-483-5p		hsa-miR-548az-5p								hsa-miR-885-5p			hsa-miR-409-3p	hsa-miR-374a-3p
	hsa-miR-33a-5p	hsa-miR-4742-3p		hsa-miR-95-3p		hsa-miR-548n											hsa-miR-432-5p	hsa-miR-548aq-3p
	hsa-miR-345-5p	hsa-miR-484		hsa-miR-885-3p		hsa-miR-598-3p											hsa-miR-485-5p	hsa-miR-769-5p
	hsa-miR-3679-5p	hsa-miR-486-3p				hsa-miR-628-3p											hsa-miR-493-5p	hsa-miR-582-3p
	hsa-miR-421	hsa-miR-486-5p				hsa-miR-941											hsa-miR-505-3p
	hsa-miR-425-3p	hsa-miR-501-3p				hsa-miR-99b-3p											hsa-miR-5187-5p
	hsa-miR-450b-5p	hsa-miR-502-3p				hsa-miR-499a-5p											hsa-miR-548j-5p
	hsa-miR-454-5p	hsa-miR-548e-3p				hsa-miR-576-3p											hsa-miR-664a-5p
	hsa-miR-483-3p	hsa-miR-576-5p				hsa-miR-10b-3p											hsa-miR-6842-3p
	hsa-miR-491-5p	hsa-miR-652-3p				hsa-miR-143-5p											hsa-miR-92b-5p
	hsa-miR-505-5p	hsa-miR-6734-5p				hsa-miR-27a-5p											hsa-miR-127-3p
	hsa-miR-532-3p	hsa-miR-92a-3p				hsa-miR-4772-3p											hsa-miR-139-5p
	hsa-miR-628-5p	hsa-miR-92b-3p				hsa-miR-500a-3p											hsa-miR-191-3p
	hsa-miR-664a-3p	hsa-miR-96-5p				hsa-miR-9-5p											hsa-miR-323b-3p
	hsa-miR-365a-3p	hsa-miR-1287-5p				hsa-miR-21-3p											hsa-miR-369-3p
	hsa-miR-365b-3p	hsa-miR-130b-5p				hsa-miR-376c-3p											hsa-miR-369-5p
	hsa-miR-548h-3p	hsa-miR-3605-3p				hsa-miR-548a-3p											hsa-miR-377-3p
	hsa-miR-548z	hsa-miR-93-3p															hsa-miR-379-5p
	hsa-miR-766-3p	hsa-miR-210-3p															hsa-miR-411-5p
	hsa-let-7b-3p	hsa-miR-25-5p															hsa-miR-431-5p
	hsa-let-7f-2-3p	hsa-miR-874-3p															hsa-miR-485-3p
	hsa-miR-1296-5p	hsa-miR-3688-3p															hsa-miR-654-3p
	hsa-miR-133a-3p																hsa-miR-136-3p
	hsa-miR-7-1-3p																hsa-miR-323a-3p
																	hsa-miR-493-3p
																	hsa-miR-625-5p
																	hsa-miR-136-5p
																	hsa-miR-376a-3p
																	hsa-miR-671-3p
																	hsa-miR-889-3p
																	hsa-miR-376b-3p

## Sheet: ATable 3
black	blue	brown	green	grey	pink	red	turquoise	yellow
Ala	Total_C	HDL_C	Total_PL	Omega_3_pct	Unsaturation	LDL_TG	VLDL_C	LDL_size
His	non_HDL_C	HDL_PL	Phosphoglyc	Omega_6_by_Omega_3	Omega_6_pct	SFA_pct	Total_TG	HDL_size
Total_BCAA	Remnant_C	HDL_CE	Cholines	Gln	PUFA_pct	XS_VLDL_TG	VLDL_TG	XL_HDL_P
Ile	Clinical_LDL_C	HDL_FC	Phosphatidylc	Gly	LA_pct	IDL_TG	HDL_TG	XL_HDL_L
Leu	LDL_C	HDL_L	Albumin	Tyr	DHA_pct	L_LDL_TG	VLDL_PL	XL_HDL_PL
Val	LDL_PL	Total_P	S_HDL_P	Glucose	PUFA_by_MUFA	M_LDL_TG	VLDL_CE	XL_HDL_C
Phe	Total_CE	HDL_P	S_HDL_L	Pyruvate		XL_HDL_TG	VLDL_FC	XL_HDL_CE
	LDL_CE	ApoA1	S_HDL_PL	bOHbutyrate		L_HDL_TG	VLDL_L	XL_HDL_FC
	Total_FC	M_HDL_P	S_HDL_C	Acetate			VLDL_P	L_HDL_P
	LDL_FC	M_HDL_L	S_HDL_CE	Acetoacetate			VLDL_size	L_HDL_L
	Total_L	M_HDL_PL	S_HDL_FC	Acetone			TG_by_PG	L_HDL_PL
	LDL_L	M_HDL_C		Creatinine			ApoB_by_ApoA1	L_HDL_C
	LDL_P	M_HDL_CE		Citrate			Total_FA	L_HDL_CE
	Sphingomyelins	M_HDL_FC					MUFA_pct	L_HDL_FC
	ApoB						GlycA
	M_VLDL_C						XXL_VLDL_L
	M_VLDL_CE						XXL_VLDL_PL
	XS_VLDL_P						XXL_VLDL_C
	XS_VLDL_L						XXL_VLDL_CE
	XS_VLDL_PL						XXL_VLDL_FC
	XS_VLDL_C						XL_VLDL_L
	XS_VLDL_CE						XL_VLDL_PL
	XS_VLDL_FC						XL_VLDL_C
	IDL_P						XL_VLDL_CE
	IDL_L						XL_VLDL_FC
	IDL_PL						XL_VLDL_TG
	IDL_C						L_VLDL_P
	IDL_CE						L_VLDL_L
	IDL_FC						L_VLDL_PL
	L_LDL_P						L_VLDL_C
	L_LDL_L						L_VLDL_CE
	L_LDL_PL						L_VLDL_FC
	L_LDL_C						L_VLDL_TG
	L_LDL_CE						M_VLDL_P
	L_LDL_FC						M_VLDL_L
	M_LDL_P						M_VLDL_PL
	M_LDL_L						M_VLDL_FC
	M_LDL_PL						M_VLDL_TG
	M_LDL_C						S_VLDL_P
	M_LDL_CE						S_VLDL_L
	M_LDL_FC						S_VLDL_PL
	S_LDL_P						S_VLDL_C
	S_LDL_L						S_VLDL_CE
	S_LDL_PL						S_VLDL_FC
	S_LDL_C						S_VLDL_TG
	S_LDL_CE						S_LDL_TG
	S_LDL_FC						M_HDL_TG
							S_HDL_TG
							XXL_VLDL_P
							XL_VLDL_P

## Sheet: ATable4
Biomarker	Correlation	P_Value	Adj.P-value
XXL_VLDL_L	-0.3900004892915225	1.1138366927446465e-4	0.0033799226422617634
XXL_VLDL_PL	-0.4063390466568428	5.313163237670446e-5	0.0033799226422617634
XXL_VLDL_C	-0.38538491540749215	1.363449058389625e-4	0.0033799226422617634
XXL_VLDL_CE	-0.3892365754278618	1.151982066513722e-4	0.0033799226422617634
XXL_VLDL_FC	-0.3840761261124003	1.4431285285979286e-4	0.0033799226422617634
XXL_VLDL_P	-0.38331942073948105	1.4911423421743074e-4	0.0033799226422617634
MUFA_pct	-0.36634773090800166	3.043631832454893e-4	0.005146340261638623
PUFA_by_MUFA	0.3635874940449198	3.405666349613795e-4	0.005146340261638623
XL_HDL_CE	0.36967459652472573	2.654478382894673e-4	0.005146340261638623
XL_HDL_C	0.355437149864425	4.7184268918227916e-4	0.0064170605728789964
TG_by_PG	-0.3513449465176685	5.539666027140209e-4	0.006644782108978251
XL_HDL_L	0.3478128646725775	6.351629957111563e-4	0.006644782108978251
XL_HDL_PL	0.34938045435080156	5.978700678012511e-4	0.006644782108978251
VLDL_size	-0.3339247422342021	0.0010711835558087242	0.007284048179499325
HDL_size	0.3410215552488285	8.225824266841591e-4	0.007284048179499325
XL_VLDL_PL	-0.33553568948656276	0.0010094091760388638	0.007284048179499325
XL_HDL_P	0.34036251203313256	8.432249116978733e-4	0.007284048179499325
L_HDL_C	0.3374431393873653	9.404673199674454e-4	0.007284048179499325
L_HDL_CE	0.3367603219499351	9.646378028668527e-4	0.007284048179499325
L_HDL_FC	0.334231163034964	0.0010591749571609128	0.007284048179499325
XL_VLDL_FC	-0.3324728008840607	0.0011297861834499668	0.007316710521390261
XL_VLDL_L	-0.3288894714642961	0.0012870915577931625	0.00795656599363046
L_HDL_L	0.3233145741458527	0.001571630476208265	0.009293119337579306
L_HDL_P	0.32079007870615583	0.0017183002266469463	0.00973703461766603
XL_VLDL_P	-0.317216757159678	0.0019470893892128023	0.010592166277317645
L_HDL_PL	0.3143499495448475	0.0021501451118186863	0.011246912892590052
L_VLDL_PL	-0.3099806009330774	0.0024964850609625194	0.012574887714477876
XL_VLDL_TG	-0.30493246249120165	0.002958516321827405	0.014369936420304538
PUFA_pct	0.30245795488269606	0.003211882868836677	0.01470183480987165
XL_VLDL_C	-0.30173138811651246	0.0032898819177488415	0.01470183480987165
L_VLDL_L	-0.3011713813896176	0.003351153522838391	0.01470183480987165
XL_HDL_FC	0.2996562073846877	0.0035220865634783376	0.014968867894782936
Total_TG	-0.29621697609351716	0.003939351636382446	0.01534287935294456
VLDL_TG	-0.29763439534791664	0.00376231274115327	0.01534287935294456
L_VLDL_FC	-0.2961450138592478	0.003948535127596026	0.01534287935294456
L_VLDL_P	-0.29415123440949587	0.004210694790484085	0.01587205232553213
L_VLDL_TG	-0.292532538800588	0.0044348381497810365	0.01587205232553213
S_LDL_TG	-0.293358675759753	0.004319146934502577	0.01587205232553213
S_HDL_TG	-0.2903860031350645	0.004748447806574144	0.016558689787027785
LA_pct	0.28241297246142694	0.006093149749431244	0.02071670914806623
VLDL_L	-0.2771049579070457	0.007165861326586732	0.02376968635160477
Unsaturation	0.2751221791420391	0.007607425391086477	0.024633567933041924
hsa.miR.885.3p	-0.27267215558123525	0.008186050926537377	0.025198699223421227
XL_VLDL_CE	-0.2727121365272256	0.00817630610722823	0.025198699223421227
L_VLDL_C	-0.2720548844537662	0.008337804890102612	0.025198699223421227
S_VLDL_TG	-0.270054490714252	0.008846734681588479	0.0261555634064355
Omega_6_pct	0.2691090855085138	0.009096614404297607	0.02632211827626542
M_VLDL_TG	-0.25532985333616504	0.0135075645934899	0.03827143301488805
hsa.miR.374a.5p	0.25240138731736406	0.014654422503688973	0.03986002921003401
S_VLDL_P	-0.25248500444572797	0.01462054101427689	0.03986002921003401
hsa.miR.483.5p	-0.2515370310804908	0.015008665029721396	0.04002310674592372
VLDL_PL	-0.24443726268868302	0.018209715439033308	0.04762540960977942
GlycA	-0.24202385872635013	0.019424142553951175	0.049843082779950185
hsa.miR.122.5p	-0.23538225245989078	0.02313145330509167	0.057911549174733165
L_VLDL_CE	-0.23490430562559914	0.023420111798605325	0.057911549174733165
S_VLDL_L	-0.23020725216365803	0.026424242538322203	0.06417316045021106
hsa.miR.27b.3p	-0.22271863287666077	0.031888786893959825	0.07477370719962993
DHA_pct	0.2230052912340924	0.03166331257275663	0.07477370719962993
VLDL_FC	-0.21885120992214024	0.03506545134348181	0.08082883699514451
hsa.miR.30d.5p	-0.2146826860581577	0.03878273581461143	0.08790753451311925
hsa.miR.193b.5p	-0.21101794995950404	0.04231743828372908	0.0921494742257501
hsa.miR.483.3p	-0.21165000751380103	0.04168935941266015	0.0921494742257501
S_VLDL_CE	-0.21064979597072708	0.04268688879575189	0.0921494742257501
hsa.miR.148a.3p	-0.20924016186191802	0.04412636943811734	0.09376853505599934
ApoB_by_ApoA1	-0.20417357173866735	0.04963681546694701	0.10385549082315067
VLDL_P	-0.19583356158705306	0.05993549517573506	0.12350344460454496
hsa.miR.505.5p	-0.19054279604495505	0.06732832053468027	0.13666644168233608
HDL_TG	-0.18719615674629808	0.0723740860940762	0.1447481721881524
hsa.miR.532.3p	-0.18585435250899	0.07448077523883471	0.14680268742726843
M_VLDL_L	-0.18479447517560563	0.0761794222382589	0.14800573463433156
M_HDL_TG	-0.18300723967694477	0.07911404821835269	0.15154240222106993
hsa.miR.125b.5p	-0.18071976700366946	0.08300121549590567	0.1567800737144885
S_VLDL_C	-0.17443916197315004	0.09445990315241619	0.17598009354422742
hsa.miR.128.3p	-0.16909264731051737	0.10516640850736955	0.18668569670591686
hsa.miR.30b.5p	-0.16994174740436319	0.103405501881214	0.18668569670591686
Total_FA	-0.16883895272424088	0.10569704887026175	0.18668569670591686
S_VLDL_PL	-0.17007501406936834	0.10313123176487622	0.18668569670591686
VLDL_C	-0.16786046908103827	0.10776327951193254	0.18789494889260033
hsa.miR.26a.5p	0.1658802757701241	0.1120408875743633	0.19288051531789124
hsa.miR.339.5p	-0.16448605447714193	0.1151308578092517	0.19572245827572787
hsa.miR.491.5p	-0.16320528092801853	0.11802710504663493	0.19816896649805368
hsa.miR.194.5p	-0.16124796241711736	0.1225614119658108	0.20327258569939352
M_VLDL_P	-0.15956225614634467	0.12657275521162972	0.2073963217925499
hsa.miR.548h.3p	-0.15599316660472376	0.13539666411214743	0.2166346625794359
hsa.miR.30d.3p	0.15654722273166527	0.13399703439560287	0.2166346625794359
hsa.miR.15b.3p	-0.15205540425846933	0.14566587866704764	0.2303553430083544
hsa.miR.590.3p	0.15071760453534358	0.1492849271346126	0.23336494356675075
hsa.miR.301a.3p	0.1494523694818583	0.15276937033385352	0.2360981177886827
hsa.miR.193a.5p	-0.14601382468659693	0.16254615847142753	0.24838514103499038
hsa.miR.339.3p	-0.14288606864328438	0.17183567972261535	0.256809367497535
S_VLDL_FC	-0.14347033043736515	0.17007137632286573	0.256809367497535
hsa.miR.1307.5p	0.1390926555760545	0.18361938824661236	0.26941172972136923
M_VLDL_PL	-0.1389009693794284	0.18423007988299514	0.26941172972136923
hsa.miR.152.3p	-0.13419519859639134	0.19968895541156453	0.2889116801699232
VLDL_CE	-0.13235600037814807	0.20597730041908296	0.2948727669157398
hsa.miR.548z	-0.12436758180143247	0.23493021845700188	0.3328178094807527
hsa.miR.204.5p	0.12143915375112045	0.24622178630618524	0.3416955401800122
hsa.miR.628.5p	-0.12190317531287774	0.24440808437649927	0.3416955401800122
M_VLDL_FC	-0.11391547656941277	0.2769276295476328	0.3804258345300814
hsa.miR.3679.5p	-0.11253048058905372	0.2828482194591616	0.3846735784644598
hsa.miR.7.1.3p	-0.10714948497342033	0.30664670230766095	0.4129104110281375
hsa.miR.34a.5p	-0.10626882164035996	0.31066231437717556	0.4142164191695674
hsa.miR.28.3p	-0.10370649094889088	0.32253911905840404	0.42587689506740734
hsa.miR.205.5p	-0.0979946721169708	0.35004764447451775	0.4495247405761809
hsa.miR.454.5p	-0.0979304825969767	0.3503648713314351	0.4495247405761809
hsa.miR.1296.5p	-0.09832055877875664	0.34843986691823725	0.4495247405761809
hsa.miR.450b.5p	0.09180999133935738	0.38143275970229695	0.48481173195805966
hsa.miR.195.5p	-0.0874077064813209	0.4047741325059965	0.5065707806478765
hsa.miR.345.5p	-0.08718042207722404	0.4060015815486657	0.5065707806478765
hsa.miR.425.3p	-0.0833737083476397	0.4268826621930235	0.5277822005295564
hsa.miR.145.5p	-0.07984802383471365	0.4467598000168357	0.5473813765972041
hsa.miR.1277.5p	0.07395681161050367	0.4811006998493932	0.5790238511461724
hsa.miR.766.3p	-0.07453101733154295	0.477692605087753	0.5790238511461724
hsa.miR.30c.5p	-0.07114104394457153	0.49800000802615196	0.5941052727329532
hsa.miR.146b.3p	-0.06964868264958846	0.5070809778819863	0.5994035283382461
hsa.miR.1908.5p	-0.06873645547901638	0.5126736815010983	0.5994035283382461
hsa.let.7b.3p	-0.06825090750215412	0.5156633295262851	0.5994035283382461
hsa.miR.15b.5p	-0.06749395738218333	0.5203417553570182	0.5997159214284278
hsa.miR.17.5p	0.06535601881440391	0.5336707532917415	0.5998969425344497
hsa.miR.335.3p	-0.06534628275740657	0.5337318385784442	0.5998969425344497
hsa.miR.421	-0.06541021088864031	0.5333308086706514	0.5998969425344497
hsa.miR.664a.3p	-0.06098875594315763	0.561415255815235	0.6258399573022291
hsa.miR.365b.3p	-0.055583697006525844	0.596674000098089	0.6597371057995131
hsa.miR.95.3p	-0.05471717872592625	0.6024174549601212	0.6607159183433587
hsa.miR.18a.5p	0.05156150129869892	0.6235376585814139	0.6784089725365783
hsa.miR.33a.5p	-0.04950658507419988	0.6374576988884038	0.6875304836333958
hsa.miR.133a.3p	-0.0488353816368368	0.6420321428047151	0.6875304836333958
LDL_size	0.04349353138682073	0.678903656217783	0.7213351347313944
hsa.miR.130b.3p	-0.037204171616050115	0.7232982652251234	0.762547008299355
hsa.miR.365a.3p	0.0327459015361403	0.7553425228863625	0.7902044854811178
hsa.miR.222.3p	-0.028264387000337395	0.7879765129146303	0.8180519523388529
hsa.miR.3065.5p	-0.01284139219252007	0.9027659307787013	0.9301224741356315
hsa.miR.1306.5p	-0.010886507883495919	0.917511523723025	0.9382072723784316
hsa.miR.192.5p	0.009823300623587342	0.925543297368274	0.9393573764334722
hsa.let.7f.2.3p	-0.00368527376526221	0.9720327389421141	0.9792329814527962
hsa.miR.378c	-0.0013984163540505298	0.9893856950325886	0.9893856950325886

## Sheet: ATable5
Biomarker	Correlation	P_Value	Adj.P_Value
VLDL_size	-0.532625995209407	8.164032405472523e-5	0.0020769056348326196
TG_by_PG	-0.5375073975835605	6.818735347909814e-5	0.0020769056348326196
XXL_VLDL_L	-0.5406614156846473	6.0608223422315174e-5	0.0020769056348326196
XXL_VLDL_PL	-0.5522369652745547	3.892900144250841e-5	0.0020769056348326196
XXL_VLDL_C	-0.5251753801012606	1.0689955473403191e-4	0.0020769056348326196
XXL_VLDL_FC	-0.5280573616823174	9.638632335550906e-5	0.0020769056348326196
XXL_VLDL_P	-0.5452364218717165	5.0978863536076716e-5	0.0020769056348326196
XXL_VLDL_CE	-0.519335973277795	1.314746785839027e-4	0.0022350695359263455
PUFA_by_MUFA	0.4952615494024202	2.969093201522678e-4	0.0033167583181981865
XL_VLDL_L	-0.4966348782584861	2.8388383792510687e-4	0.0033167583181981865
XL_VLDL_PL	-0.4932425589383374	3.170430745336502e-4	0.0033167583181981865
XL_VLDL_FC	-0.4948197964368193	3.012128312946524e-4	0.0033167583181981865
XL_VLDL_TG	-0.4961729307884883	2.8820625229931886e-4	0.0033167583181981865
VLDL_TG	-0.4807813976885938	4.711324611675802e-4	0.004219336748304923
L_VLDL_TG	-0.4802818337231159	4.7852428298703813e-4	0.004219336748304923
XL_VLDL_P	-0.47910240576344987	4.963925586241086e-4	0.004219336748304923
Unsaturation	0.47129769093890134	6.306013734395155e-4	0.004288089339388705
L_VLDL_P	-0.4720242722401707	6.16855260275736e-4	0.004288089339388705
L_VLDL_L	-0.47362922526192996	5.874425318948001e-4	0.004288089339388705
L_HDL_PL	0.4742056965510194	5.771902763107962e-4	0.004288089339388705
MUFA_pct	-0.4631630459086831	8.044318303335614e-4	0.004487634834991148
XL_VLDL_C	-0.4623106516207134	8.249328740792551e-4	0.004487634834991148
L_VLDL_PL	-0.46690878164742416	7.196574145882762e-4	0.004487634834991148
L_VLDL_FC	-0.4656094737906898	7.481077340053794e-4	0.004487634834991148
L_HDL_L	0.46369791051884496	7.918024133924605e-4	0.004487634834991148
HDL_size	0.46027715352101684	8.757466213534332e-4	0.00458082848092565
L_HDL_P	0.4528154412905277	0.0010871259729042168	0.005475893789443463
M_VLDL_TG	-0.44587297086406297	0.0013236325065141025	0.006429072174497069
L_HDL_FC	0.44335884297738526	0.0014199952522128772	0.006659288079343148
XL_HDL_CE	0.4396830097286249	0.0015721516683217614	0.007127087563058652
Total_TG	-0.43696160494267805	0.001693985365157605	0.007431677731014008
XL_HDL_C	0.43427664083843565	0.0018223491744002712	0.007744983991201153
XL_VLDL_CE	-0.4290714677087492	0.002096059370258259	0.00786946557127132
L_VLDL_C	-0.43002078674872074	0.0020435762045176247	0.00786946557127132
XL_HDL_P	0.43068565344521387	0.0020075167792481274	0.00786946557127132
XL_HDL_PL	0.4282759393634899	0.0021409575451252854	0.00786946557127132
L_HDL_C	0.429542355136843	0.002069878714822439	0.00786946557127132
XL_HDL_L	0.4250364858281755	0.0023327207712132035	0.008282113017475078
L_HDL_CE	0.42435386966013533	0.0023750177035406473	0.008282113017475078
PUFA_pct	0.4233245245625961	0.0024400836346192764	0.00829628435770554
VLDL_L	-0.4107571018427006	0.0033714898349722147	0.011183478476981005
L_VLDL_CE	-0.4064803255699129	0.0037532626734091716	0.012153421990086842
S_VLDL_TG	-0.4015669737676328	0.004238336798717248	0.013404972200594088
LA_pct	0.39234320022789215	0.005299149920485206	0.01637919066331791
hsa.miR.885.3p	-0.3771672392747707	0.007551983813563823	0.022327604318362605
S_HDL_TG	-0.3774621932836886	0.007501316932908181	0.022327604318362605
S_LDL_TG	-0.37493622116248654	0.007944932796910947	0.02298959277404019
VLDL_PL	-0.3725480853540832	0.0083850663864522	0.023757688094947903
XL_HDL_FC	0.3708531768841224	0.008710097904926927	0.024174965613674736
S_VLDL_P	-0.3446510563387601	0.015304554266342772	0.041628387604452345
hsa.miR.301a.3p	0.3367774920859576	0.017973493444477337	0.04531211617273836
Omega_6_pct	0.33882278844888514	0.017244858457610732	0.04531211617273836
GlycA	-0.33814948532233025	0.017481903151415203	0.04531211617273836
S_VLDL_L	-0.33672763567447717	0.017991575539175523	0.04531211617273836
VLDL_FC	-0.334159921904517	0.01894391705466857	0.04684314035336228
hsa.miR.1307.5p	0.3310837964300933	0.02014064739194219	0.04891300080900246
M_VLDL_L	-0.32773007449765806	0.021517482970453774	0.05133995936810023
ApoB_by_ApoA1	-0.31222322400684355	0.028957607141670418	0.06790059605633063
hsa.miR.365a.3p	0.30751889581644	0.03159892403830228	0.07283819778320526
VLDL_P	-0.2962699933080224	0.03873310386593365	0.08779503542944961
DHA_pct	0.29440955176839095	0.0400317253054745	0.08925105969745133
hsa.miR.374a.5p	0.2794806144219574	0.0517980297480556	0.11181796897992954
M_HDL_TG	-0.2797170177801209	0.05159200545734412	0.11181796897992954
M_VLDL_P	-0.2637839266534572	0.06703986649547386	0.1402680283597607
S_VLDL_CE	-0.264443190587418	0.06633489867725909	0.1402680283597607
hsa.miR.30d.5p	-0.25322908364930163	0.07915968559998558	0.16311692790300059
S_VLDL_PL	-0.24665530941762534	0.08753919893379071	0.1776915082835155
VLDL_C	-0.24535476955337995	0.0892761628501796	0.1785523257003592
hsa.miR.122.5p	-0.24322440341592158	0.09217931489306323	0.1792541797611078
HDL_TG	-0.24127527615732164	0.09489927163823354	0.1792541797611078
M_VLDL_PL	-0.24271784336465133	0.09288030811128534	0.1792541797611078
S_VLDL_C	-0.24187299267166307	0.09405864105983633	0.1792541797611078
hsa.miR.590.3p	0.21418749844005555	0.13945631637806322	0.2598090277728301
hsa.miR.27b.3p	-0.21265626304079438	0.14237495970010158	0.261662088097484
Total_FA	-0.20963915879300707	0.1482581822304452	0.26884150377787397
hsa.miR.193b.5p	-0.2075628578514295	0.15240999640087025	0.2727336777699783
hsa.miR.33a.5p	-0.2036395059827664	0.16048790291080975	0.2834591531931185
M_VLDL_FC	-0.19927168018361854	0.16984434124577857	0.296138851402896
hsa.miR.148a.3p	-0.1975776089331596	0.17357772029358512	0.29881734126490606
VLDL_CE	-0.19474526955936988	0.17995152177657886	0.30591758702018407
hsa.miR.1306.5p	0.1912418799604193	0.18806606537831064	0.3157652455734598
S_VLDL_FC	-0.1897585907450879	0.1915792086174849	0.3177411264875359
hsa.miR.204.5p	0.18577126638807803	0.20125404479915185	0.3265022119553253
LDL_size	0.18560568592445292	0.20166313091358326	0.3265022119553253
hsa.miR.26a.5p	0.17672699602693984	0.22446446706205636	0.35794160758871413
hsa.miR.548h.3p	-0.1760231034647357	0.22634542832815746	0.35794160758871413
hsa.miR.146b.3p	-0.17232962609002742	0.2363935050201384	0.36533541684930476
hsa.miR.30d.3p	0.1727792336072752	0.23515430114386562	0.36533541684930476
hsa.miR.483.3p	-0.16938764520836985	0.2446124217338622	0.36963654839783616
hsa.miR.365b.3p	0.16953168219793746	0.2442055686647013	0.36963654839783616
hsa.miR.664a.3p	-0.15903375361147795	0.27506953456390904	0.41109293077683107
hsa.miR.548z	-0.15726369484310904	0.2805165732721871	0.4146766735327983
hsa.miR.145.5p	0.15167506073982806	0.29817697848565167	0.4314049901494535
hsa.miR.17.5p	0.15205141013677423	0.2969656178662863	0.4314049901494535
hsa.miR.450b.5p	0.1466569589127347	0.3146335430904114	0.4504227564241679
hsa.miR.345.5p	0.14162604912165497	0.3317007385739167	0.469909379646382
hsa.miR.28.3p	-0.14002392089701238	0.3372551878269793	0.47285263447906367
hsa.miR.133a.3p	0.1385720385601176	0.34233840441695196	0.47508186735413743
hsa.miR.34a.5p	-0.13640401184374343	0.3500166553217441	0.476022651237572
hsa.miR.3679.5p	0.1366539743182898	0.3491260399901419	0.476022651237572
hsa.let.7b.3p	0.13462031135844205	0.3564123946734533	0.47992164035237284
hsa.miR.483.5p	-0.125911581070065	0.38865112171915317	0.5182014956255375
hsa.miR.15b.3p	-0.11978904015045928	0.41231035702980323	0.5444097918063422
hsa.miR.195.5p	0.11801424586977435	0.4193199520554731	0.5483414757648495
hsa.miR.125b.5p	-0.11622518282247866	0.4264540360346478	0.5523595133401153
hsa.miR.130b.3p	0.10635142306043227	0.4670372551556895	0.5992176103884318
hsa.miR.18a.5p	0.10262894436642489	0.4828581144067613	0.6137262014889676
hsa.miR.628.5p	-0.09398178888872695	0.5206697061214515	0.6556581484492352
hsa.miR.30c.5p	0.08431832831152825	0.5646025164923286	0.7026352331179737
hsa.miR.425.3p	-0.0835199387084002	0.5683079091395375	0.7026352331179737
hsa.miR.7.1.3p	-0.07694229192480459	0.5992550456141547	0.7342223982299552
hsa.miR.454.5p	0.0751915842289903	0.6076146602817944	0.7378178017707503
hsa.miR.491.5p	-0.0730150689634721	0.6180770530173378	0.7438803469943182
hsa.miR.1277.5p	0.0673816882772249	0.645502642757089	0.7700733282014395
hsa.miR.339.3p	0.06324288437613844	0.6659562814433817	0.7835346883697701
hsa.miR.339.5p	-0.0627699950043202	0.6683089989036275	0.7835346883697701
hsa.miR.1908.5p	0.06147614103207344	0.6747622543485943	0.7843390306958019
hsa.miR.378c	0.05212032865235995	0.7220909384846895	0.8322404036772693
hsa.miR.95.3p	0.05081470258015064	0.7287832818557536	0.8328951792637184
hsa.miR.128.3p	-0.04085443218995552	0.7804637805265905	0.8793440230932643
hsa.miR.3065.5p	0.040493166043343784	0.7823575499579778	0.8793440230932643
hsa.miR.30b.5p	-0.037738287783005385	0.7968390413048829	0.888279587028394
hsa.miR.194.5p	-0.035636911468411664	0.8079312557330731	0.8900774316488711
hsa.let.7f.2.3p	-0.03495457079022493	0.8115411876798532	0.8900774316488711
hsa.miR.335.3p	0.030094045489235173	0.8373638917845654	0.9110519142616073
hsa.miR.15b.5p	0.02767662795483153	0.8502722105250882	0.9177541319953332
hsa.miR.152.3p	0.024255214772456922	0.8686073751553265	0.9228953361025344
hsa.miR.766.3p	0.02464483225412824	0.8665157967864425	0.9228953361025344
hsa.miR.192.5p	0.008404610693201631	0.9542946907354122	0.9613635402964151
hsa.miR.193a.5p	-0.01317286871207404	0.9284195358062348	0.9613635402964151
hsa.miR.205.5p	-0.01025082031024609	0.9442691662646683	0.9613635402964151
hsa.miR.222.3p	0.01437373556069475	0.9219134634704054	0.9613635402964151
hsa.miR.421	-0.008835504725235704	0.9519541117337382	0.9613635402964151
hsa.miR.505.5p	-0.010189175847956564	0.944603786707501	0.9613635402964151
hsa.miR.1296.5p	-0.010195267143557944	0.9445707213197034	0.9613635402964151
hsa.miR.532.3p	-7.468403741605293e-4	0.9959364551387002	0.9959364551387002

## Sheet: ATable6
Biomarker	Correlation	P_Value	Adj.P_Value
hsa.miR.3679.5p	-0.38609234443297	0.00963808095219518	0.37829863327045027
hsa.miR.339.3p	-0.3670774825858298	0.01424368307870866	0.37829863327045027
hsa.miR.505.5p	-0.3630558039908271	0.015426976901745673	0.37829863327045027
hsa.miR.483.5p	-0.3548997810222886	0.01808416535325652	0.37829863327045027
hsa.miR.345.5p	-0.33990578373171	0.023979790114625046	0.37829863327045027
hsa.miR.532.3p	-0.3358838102734876	0.025809785064674476	0.37829863327045027
XL_HDL_PL	0.3257364060977527	0.030949642382080735	0.37829863327045027
hsa.miR.195.5p	-0.3214077937017413	0.033386123508769336	0.37829863327045027
hsa.miR.152.3p	-0.3132485651638931	0.038408652984831856	0.37829863327045027
hsa.miR.145.5p	-0.3121396219532977	0.039136708325393225	0.37829863327045027
hsa.miR.128.3p	-0.30188718395543707	0.04641706441662371	0.37829863327045027
XL_HDL_CE	0.30004351424272596	0.04783598859723144	0.37829863327045027
hsa.let.7b.3p	-0.29865263092211614	0.04892952017902474	0.37829863327045027
XL_HDL_FC	0.294866601635346	0.05200887543688549	0.37829863327045027
HDL_size	0.293025994463575	0.053561361370450006	0.37829863327045027
XL_HDL_P	0.2907367909527423	0.05554401927624482	0.37829863327045027
hsa.miR.483.3p	-0.28930323045956313	0.0568153280412018	0.37829863327045027
XL_HDL_C	0.285034761080545	0.060739335031839196	0.37829863327045027
hsa.miR.30b.5p	-0.28187012833753344	0.06378594929142604	0.37829863327045027
L_HDL_FC	0.2781154314210655	0.0675570392781688	0.37829863327045027
hsa.miR.194.5p	-0.2753002139220583	0.07049882427336146	0.37829863327045027
L_HDL_C	0.27489598404388915	0.0709294156064522	0.37829863327045027
hsa.miR.454.5p	-0.2723167619299613	0.07372597716701844	0.37829863327045027
XL_HDL_L	0.2707971307323927	0.07541389048629929	0.37829863327045027
L_HDL_CE	0.2687256963314358	0.0777635003080445	0.37829863327045027
hsa.miR.193a.5p	-0.26840525792849856	0.07813204608499094	0.37829863327045027
L_HDL_P	0.2677713354807955	0.07886517495943236	0.37829863327045027
L_HDL_L	0.26685861076988626	0.07993019694065417	0.37829863327045027
hsa.miR.491.5p	-0.26434310588623844	0.08292378983875477	0.37829863327045027
hsa.miR.339.5p	-0.2620727876664794	0.08570011016502978	0.37829863327045027
L_HDL_PL	0.26164613963995814	0.08622983552488206	0.37829863327045027
XXL_VLDL_PL	-0.2546829899405667	0.09524036876834575	0.4047715672654695
hsa.miR.133a.3p	-0.24961022161593155	0.10224990542428473	0.42139354962735526
XXL_VLDL_C	-0.24523922871730636	0.1086012783427097	0.4344051133708388
hsa.miR.27b.3p	-0.24241034373696738	0.1128693989410274	0.43506534669033614
hsa.miR.125b.5p	-0.23829705244508997	0.11930110354708397	0.43506534669033614
XXL_VLDL_P	-0.23797965428802798	0.11980866674021144	0.43506534669033614
hsa.miR.365b.3p	-0.23578279787037665	0.12336652719910253	0.43506534669033614
PUFA_by_MUFA	0.23250203248576995	0.12882700806036013	0.43506534669033614
hsa.miR.30c.5p	-0.2310048988561073	0.13137812558890022	0.43506534669033614
hsa.miR.374a.5p	0.2304615314827758	0.1323132980940047	0.43506534669033614
hsa.miR.193b.5p	-0.2251222745037398	0.1417684063738721	0.43506534669033614
XXL_VLDL_L	-0.22403728131824374	0.14374944029660408	0.43506534669033614
hsa.miR.7.1.3p	-0.22390743326380602	0.14398788701273688	0.43506534669033614
XXL_VLDL_FC	-0.22279698403074552	0.14603901115451184	0.43506534669033614
MUFA_pct	-0.2221979215711165	0.14715445549820194	0.43506534669033614
hsa.miR.122.5p	-0.2177411258981903	0.15565071418824722	0.4503935559489707
hsa.miR.1306.5p	-0.21240322739222595	0.16629225230866465	0.46300321875354683
XXL_VLDL_CE	-0.21214634615599642	0.16681733616855732	0.46300321875354683
hsa.miR.205.5p	-0.20681982687341804	0.1779771940932559	0.46846073947451
hsa.miR.148a.3p	-0.2067186396131414	0.17819425484647347	0.46846073947451
S_HDL_TG	-0.2062893085763007	0.17911734156378323	0.46846073947451
hsa.miR.1908.5p	-0.19959706690968373	0.19395142628212275	0.48297813594271427
S_LDL_TG	-0.19910352156898192	0.19507882857556036	0.48297813594271427
LA_pct	0.1989973148215719	0.19532204027095063	0.48297813594271427
XL_VLDL_CE	-0.1948197026845807	0.20505925082980053	0.49800103772951554
Omega_6_pct	0.18535072406211528	0.22837553367874086	0.5437874357372129
hsa.miR.130b.3p	-0.1839747099905957	0.2319093475938114	0.5437874357372129
XL_VLDL_C	-0.18056493205211271	0.2408268086125761	0.5551262029035653
hsa.miR.95.3p	-0.1767910022187895	0.2509647355752829	0.5676216379114263
hsa.miR.365a.3p	-0.1754646136320895	0.25459499935733093	0.5676216379114263
PUFA_pct	0.1709390559119945	0.2672452579802006	0.5751348672824523
L_VLDL_C	-0.16986850972497736	0.27029761259432855	0.5751348672824523
hsa.miR.628.5p	-0.16808215281938838	0.27544199946690295	0.5751348672824523
TG_by_PG	-0.1672825199475788	0.2777655225554367	0.5751348672824523
hsa.miR.335.3p	-0.16553444562629133	0.28288963986311794	0.5751348672824523
hsa.miR.15b.3p	-0.16538230803338522	0.28333850079356104	0.5751348672824523
XL_VLDL_FC	-0.1576213249856659	0.30685311065492116	0.601433385513391
hsa.miR.30d.3p	0.15731721179938501	0.3077991724654399	0.601433385513391
VLDL_PL	-0.1567523575151753	0.3095613013671865	0.601433385513391
hsa.miR.15b.5p	-0.15525242668625605	0.3142716166664445	0.6019850685441753
L_VLDL_FC	-0.1516983216407088	0.3256130466332363	0.6120155940879823
hsa.miR.26a.5p	0.15060313215608692	0.3291589303880623	0.6120155940879823
VLDL_FC	-0.14941498478010184	0.33303294469180456	0.6120155940879823
VLDL_L	-0.14786183162162583	0.33813966003941553	0.6120155940879823
L_VLDL_CE	-0.14568196623873855	0.34538823809107366	0.6120155940879823
S_VLDL_P	-0.14534749246315032	0.3465088290056959	0.6120155940879823
DHA_pct	0.1384735695081017	0.370030592790359	0.6399503881520571
hsa.miR.30d.5p	-0.13661137189246308	0.3765635785368363	0.6399503881520571
XL_VLDL_PL	-0.1349667571851692	0.3823898708667748	0.6399503881520571
hsa.miR.885.3p	-0.13413842045205107	0.3853444315853608	0.6399503881520571
VLDL_P	-0.1339963735259	0.3858524399152109	0.6399503881520571
S_VLDL_L	-0.12795146991960893	0.4078344896160261	0.6682589227443319
L_VLDL_PL	-0.12368424593276656	0.42377570282619914	0.686113042670989
XL_VLDL_P	-0.12103725047571533	0.433838090702811	0.6887305105569321
Total_FA	-0.12059797042627926	0.43552076402864826	0.6887305105569321
S_VLDL_CE	-0.11613161393456917	0.4528338603170541	0.6969395451689943
ApoB_by_ApoA1	-0.1158878642034819	0.45378936602795816	0.6969395451689943
HDL_TG	-0.11494981934817516	0.4574767331135321	0.6969395451689943
hsa.miR.548h.3p	-0.1131311482203877	0.4646717171772371	0.6969395451689943
GlycA	-0.1121727014130947	0.4684877687723955	0.6969395451689943
hsa.miR.548z	-0.11142929688123185	0.4714591040849079	0.6969395451689943
L_VLDL_P	-0.10886766844018358	0.4817740210634236	0.7012889849506405
XL_VLDL_L	-0.10576631969243994	0.4944187985313774	0.7012889849506405
Total_TG	-0.10574810308313298	0.49449357276106054	0.7012889849506405
VLDL_C	-0.10467650029327324	0.4989024450222115	0.7012889849506405
S_VLDL_TG	-0.1033982380301954	0.5041877801604144	0.7012889849506405
VLDL_size	-0.10312033771242858	0.5053405920967851	0.7012889849506405
hsa.miR.34a.5p	-0.10003151355061542	0.5182434280447039	0.7119303657987851
L_VLDL_L	-0.09712295281431904	0.530541484061854	0.7121710017131413
S_VLDL_C	-0.0970400502152232	0.5308940958820612	0.7121710017131413
hsa.miR.1296.5p	-0.096280918348527	0.534128251284856	0.7121710017131413
M_VLDL_P	-0.09488614777167242	0.5400953175512347	0.7131355649220187
hsa.miR.3065.5p	-0.09187719992486587	0.5530765462934171	0.7232539451529301
hsa.miR.425.3p	-0.09035935041918126	0.5596803088384599	0.7249192571621956
LDL_size	-0.08832132735794467	0.5686047404000265	0.7295306103245622
hsa.miR.590.3p	0.0831862333760969	0.5913769364282904	0.7309466141679802
M_HDL_TG	-0.08210074494513495	0.5962418681784565	0.7309466141679802
hsa.miR.421	-0.08174476084746925	0.5978411314470674	0.7309466141679802
VLDL_TG	-0.0816432245192526	0.598297628708749	0.7309466141679802
hsa.miR.204.5p	0.08103583142229527	0.60103158578189	0.7309466141679802
VLDL_CE	-0.08074772465417682	0.6023302909516591	0.7309466141679802
S_VLDL_PL	-0.07774460935898972	0.6159393433459874	0.7309466141679802
M_VLDL_L	-0.077590160611526	0.6166427562855199	0.7309466141679802
hsa.miR.1277.5p	0.07693272160312145	0.619640750401482	0.7309466141679802
hsa.miR.28.3p	-0.07525537079740721	0.6273172292512446	0.7309466141679802
hsa.miR.33a.5p	0.07492603273014738	0.6288290724827477	0.7309466141679802
M_VLDL_TG	-0.07242033899419514	0.6403803783743816	0.7380655208382703
XL_VLDL_TG	-0.07021776365876672	0.6506042427738885	0.7435477060273011
S_VLDL_FC	-0.06888647839622739	0.6568147919983716	0.7443900975981544
M_VLDL_PL	-0.06653190741812925	0.6678549681367921	0.7464062830843728
hsa.miR.766.3p	-0.06616740437822863	0.6695703421786287	0.7464062830843728
Unsaturation	0.0628031209734568	0.68548038134341	0.757929527339055
M_VLDL_FC	-0.057112958851117765	0.712695013248428	0.7816654984015016
hsa.miR.378c	-0.050138665592581885	0.746535327926457	0.8110914881032185
hsa.miR.1307.5p	-0.04913369267806347	0.751452408095629	0.8110914881032185
L_VLDL_TG	-0.04679887944496565	0.7629133731986915	0.8169781004332445
hsa.miR.192.5p	0.04358638661806896	0.7787643909322426	0.8221647651548447
hsa.miR.664a.3p	0.04336755465239768	0.7798474610659923	0.8221647651548447
hsa.miR.146b.3p	0.03907106463819909	0.8011931905667554	0.8381713378236827
hsa.let.7f.2.3p	0.031855854818639694	0.837355999941836	0.867454285033401
hsa.miR.17.5p	0.030688080899989867	0.8432422578183865	0.867454285033401
hsa.miR.450b.5p	-0.029682200764839295	0.8483192640400172	0.867454285033401
hsa.miR.18a.5p	-0.022121103563608087	0.8866630554863426	0.8998968324339
hsa.miR.222.3p	-0.007488705062026719	0.9615209587676566	0.9672630337022914
hsa.miR.301a.3p	-0.0063705372200074245	0.9672630337022914	0.9672630337022914

## Sheet: ATable7
miEAA - miRNA Enrichment and Annotation -- Analysis results
Category	Subcategory	Enrichment	P-value	P-adjusted	Q-value	Expected	Observed	miRNAs/precursors
Diseases (MNDR)	Kidney chromophobe cancer	over-represented	6.68e-5	0.0040615	0.0040615	1.04849	6	hsa-miR-1307-5p; hsa-miR-26a-5p; hsa-miR-301a-3p; hsa-miR-374a-5p; hsa-miR-590-3p; hsa-miR-30d-3p

## Sheet: ATable8
miEAA - miRNA Enrichment and Annotation -- Analysis results
Category	Subcategory	Enrichment	P-value	P-adjusted	Q-value	Expected	Observed	miRNAs/precursors
Diseases (MNDR)	Prostate cancer	over-represented	1.45e-8	6.76e-7	6.76e-7	4.22057	16	hsa-miR-122-5p; hsa-miR-125b-5p; hsa-miR-128-3p; hsa-miR-148a-3p; hsa-miR-152-3p; hsa-miR-192-5p; hsa-miR-193b-5p; hsa-miR-194-5p; hsa-miR-27b-3p; hsa-miR-28-3p; hsa-miR-30d-5p; hsa-miR-34a-5p; hsa-miR-378c; hsa-miR-483-5p; hsa-miR-95-3p; hsa-miR-885-3p
Diseases (MNDR)	Progesterone-receptor negative breast cancer	over-represented	5.86e-8	1.78e-6	1.78e-6	4.62182	16	hsa-miR-122-5p; hsa-miR-125b-5p; hsa-miR-128-3p; hsa-miR-146b-3p; hsa-miR-148a-3p; hsa-miR-152-3p; hsa-miR-192-5p; hsa-miR-193a-5p; hsa-miR-193b-5p; hsa-miR-194-5p; hsa-miR-28-3p; hsa-miR-30d-5p; hsa-miR-34a-5p; hsa-miR-483-5p; hsa-miR-95-3p; hsa-miR-885-3p
Diseases (MNDR)	Lung cancer	over-represented	1.38e-7	3.06e-6	3.06e-6	4.88932	16	hsa-miR-122-5p; hsa-miR-125b-5p; hsa-miR-128-3p; hsa-miR-146b-3p; hsa-miR-152-3p; hsa-miR-192-5p; hsa-miR-193a-5p; hsa-miR-193b-5p; hsa-miR-194-5p; hsa-miR-27b-3p; hsa-miR-28-3p; hsa-miR-30d-5p; hsa-miR-34a-5p; hsa-miR-483-5p; hsa-miR-95-3p; hsa-miR-885-3p
Diseases (MNDR)	Estrogen-receptor positive breast cancer	over-represented	1.63e-7	3.24e-6	3.24e-6	4.94134	16	hsa-miR-122-5p; hsa-miR-125b-5p; hsa-miR-128-3p; hsa-miR-146b-3p; hsa-miR-148a-3p; hsa-miR-152-3p; hsa-miR-192-5p; hsa-miR-193a-5p; hsa-miR-193b-5p; hsa-miR-194-5p; hsa-miR-28-3p; hsa-miR-30d-5p; hsa-miR-34a-5p; hsa-miR-483-5p; hsa-miR-95-3p; hsa-miR-885-3p
Diseases (MNDR)	Progesterone-receptor positive breast cancer	over-represented	1.59e-7	3.24e-6	3.24e-6	4.93391	16	hsa-miR-122-5p; hsa-miR-125b-5p; hsa-miR-128-3p; hsa-miR-146b-3p; hsa-miR-148a-3p; hsa-miR-152-3p; hsa-miR-192-5p; hsa-miR-193a-5p; hsa-miR-193b-5p; hsa-miR-194-5p; hsa-miR-27b-3p; hsa-miR-28-3p; hsa-miR-34a-5p; hsa-miR-483-5p; hsa-miR-95-3p; hsa-miR-885-3p
Diseases (MNDR)	Breast cancer luminal	over-represented	1.90e-7	3.59e-6	3.59e-6	1.82049	11	hsa-miR-125b-5p; hsa-miR-128-3p; hsa-miR-148a-3p; hsa-miR-192-5p; hsa-miR-193a-5p; hsa-miR-193b-5p; hsa-miR-194-5p; hsa-miR-28-3p; hsa-miR-34a-5p; hsa-miR-483-5p; hsa-miR-95-3p
Diseases (MNDR)	Estrogen-receptor negative breast cancer	over-represented	5.31e-7	8.23e-6	8.23e-6	4.50293	15	hsa-miR-122-5p; hsa-miR-125b-5p; hsa-miR-128-3p; hsa-miR-146b-3p; hsa-miR-152-3p; hsa-miR-192-5p; hsa-miR-193a-5p; hsa-miR-193b-5p; hsa-miR-194-5p; hsa-miR-27b-3p; hsa-miR-30d-5p; hsa-miR-34a-5p; hsa-miR-483-5p; hsa-miR-95-3p; hsa-miR-885-3p
Diseases (MNDR)	Bladder cancer	over-represented	1.42e-6	1.68e-5	1.68e-5	0.943684	8	hsa-miR-125b-5p; hsa-miR-148a-3p; hsa-miR-152-3p; hsa-miR-192-5p; hsa-miR-193a-5p; hsa-miR-27b-3p; hsa-miR-28-3p; hsa-miR-34a-5p
Diseases (MNDR)	Breast cancer	over-represented	3.43e-6	3.38e-5	3.38e-5	7.08135	17	hsa-miR-122-5p; hsa-miR-125b-5p; hsa-miR-128-3p; hsa-miR-146b-3p; hsa-miR-148a-3p; hsa-miR-152-3p; hsa-miR-192-5p; hsa-miR-193a-5p; hsa-miR-193b-5p; hsa-miR-194-5p; hsa-miR-27b-3p; hsa-miR-28-3p; hsa-miR-30d-5p; hsa-miR-34a-5p; hsa-miR-483-5p; hsa-miR-95-3p; hsa-miR-885-3p
Diseases (MNDR)	Basal-like breast cancer	over-represented	3.59e-6	3.48e-5	3.48e-5	1.45639	9	hsa-miR-122-5p; hsa-miR-128-3p; hsa-miR-192-5p; hsa-miR-193a-5p; hsa-miR-193b-5p; hsa-miR-194-5p; hsa-miR-30d-5p; hsa-miR-34a-5p; hsa-miR-483-5p
Diseases (MNDR)	Her2-receptor positive breast cancer	over-represented	7.65e-6	6.36e-5	6.36e-5	4.62925	14	hsa-miR-122-5p; hsa-miR-125b-5p; hsa-miR-128-3p; hsa-miR-146b-3p; hsa-miR-152-3p; hsa-miR-192-5p; hsa-miR-193a-5p; hsa-miR-193b-5p; hsa-miR-194-5p; hsa-miR-28-3p; hsa-miR-34a-5p; hsa-miR-483-5p; hsa-miR-95-3p; hsa-miR-885-3p
Diseases (MNDR)	Hypopharynx cancer	over-represented	2.44e-5	1.08e-4	1.08e-4	0.37896	5	hsa-miR-122-5p; hsa-miR-125b-5p; hsa-miR-148a-3p; hsa-miR-27b-3p; hsa-miR-34a-5p
Diseases (MNDR)	Pancreatic cancer	over-represented	1.63e-5	1.08e-4	1.08e-4	9.07274	18	hsa-miR-122-5p; hsa-miR-125b-5p; hsa-miR-128-3p; hsa-miR-146b-3p; hsa-miR-148a-3p; hsa-miR-152-3p; hsa-miR-192-5p; hsa-miR-193a-5p; hsa-miR-193b-5p; hsa-miR-194-5p; hsa-miR-27b-3p; hsa-miR-28-3p; hsa-miR-30d-5p; hsa-miR-34a-5p; hsa-miR-378c; hsa-miR-483-5p; hsa-miR-95-3p; hsa-miR-885-3p
Diseases (MNDR)	Nasopharyngeal cancer	over-represented	2.89e-5	1.21e-4	1.21e-4	4.35432	13	hsa-miR-122-5p; hsa-miR-125b-5p; hsa-miR-128-3p; hsa-miR-148a-3p; hsa-miR-152-3p; hsa-miR-193b-5p; hsa-miR-194-5p; hsa-miR-27b-3p; hsa-miR-28-3p; hsa-miR-30d-5p; hsa-miR-34a-5p; hsa-miR-483-5p; hsa-miR-885-3p
Diseases (MNDR)	Ovarian cancer	over-represented	3.94e-5	1.49e-4	1.49e-4	2.48181	10	hsa-miR-125b-5p; hsa-miR-128-3p; hsa-miR-148a-3p; hsa-miR-152-3p; hsa-miR-192-5p; hsa-miR-194-5p; hsa-miR-27b-3p; hsa-miR-30d-5p; hsa-miR-34a-5p; hsa-miR-483-5p
Diseases (MNDR)	Colorectal cancer	over-represented	5.59e-5	2.01e-4	2.01e-4	8.44114	17	hsa-miR-122-5p; hsa-miR-125b-5p; hsa-miR-128-3p; hsa-miR-146b-3p; hsa-miR-148a-3p; hsa-miR-152-3p; hsa-miR-192-5p; hsa-miR-193a-5p; hsa-miR-193b-5p; hsa-miR-194-5p; hsa-miR-27b-3p; hsa-miR-28-3p; hsa-miR-30d-5p; hsa-miR-34a-5p; hsa-miR-378c; hsa-miR-483-5p; hsa-miR-95-3p
Diseases (MNDR)	Head and neck cancer	over-represented	5.59e-5	2.01e-4	2.01e-4	1.53813	8	hsa-miR-122-5p; hsa-miR-125b-5p; hsa-miR-128-3p; hsa-miR-148a-3p; hsa-miR-152-3p; hsa-miR-194-5p; hsa-miR-30d-5p; hsa-miR-95-3p
Diseases (MNDR)	Small cell lung cancer	over-represented	5.57e-5	2.01e-4	2.01e-4	2.02855	9	hsa-miR-125b-5p; hsa-miR-128-3p; hsa-miR-148a-3p; hsa-miR-152-3p; hsa-miR-193a-5p; hsa-miR-30d-5p; hsa-miR-34a-5p; hsa-miR-483-5p; hsa-miR-95-3p
Diseases (MNDR)	Urinary bladder cancer	over-represented	2.31e-4	7.62e-4	7.62e-4	0.958545	6	hsa-miR-125b-5p; hsa-miR-152-3p; hsa-miR-193a-5p; hsa-miR-194-5p; hsa-miR-27b-3p; hsa-miR-28-3p
Diseases (MNDR)	Uterus cancer	over-represented	2.63e-4	8.46e-4	8.46e-4	0.980837	6	hsa-miR-122-5p; hsa-miR-128-3p; hsa-miR-148a-3p; hsa-miR-192-5p; hsa-miR-194-5p; hsa-miR-34a-5p
Diseases (MNDR)	Germ cell and embryonal cancer	over-represented	4.04e-4	0.0010687	0.0010687	0.371529	4	hsa-miR-122-5p; hsa-miR-125b-5p; hsa-miR-148a-3p; hsa-miR-34a-5p
Diseases (MNDR)	Thyroid cancer	over-represented	4.75e-4	0.0011745	0.0011745	1.55299	7	hsa-miR-125b-5p; hsa-miR-148a-3p; hsa-miR-152-3p; hsa-miR-193b-5p; hsa-miR-27b-3p; hsa-miR-30d-5p; hsa-miR-34a-5p
Diseases (MNDR)	Kidney cancer	over-represented	5.40e-4	0.0012946	0.0012946	0.720767	5	hsa-miR-122-5p; hsa-miR-125b-5p; hsa-miR-194-5p; hsa-miR-34a-5p; hsa-miR-483-5p
Diseases (MNDR)	Tongue cancer	over-represented	5.85e-4	0.0013785	0.0013785	0.408682	4	hsa-miR-122-5p; hsa-miR-125b-5p; hsa-miR-148a-3p; hsa-miR-34a-5p
Diseases (MNDR)	Skin cancer	over-represented	6.27e-4	0.0014627	0.0014627	0.416113	4	hsa-miR-122-5p; hsa-miR-125b-5p; hsa-miR-148a-3p; hsa-miR-34a-5p
Diseases (MNDR)	Mixed cell type cancer	over-represented	7.71e-4	0.0017306	0.0017306	0.0445835	2	hsa-miR-125b-5p; hsa-miR-34a-5p
Diseases (MNDR)	Kidney chromophobe cancer	over-represented	7.91e-4	0.0017644	0.0017644	2.84591	9	hsa-miR-146b-3p; hsa-miR-152-3p; hsa-miR-192-5p; hsa-miR-193a-5p; hsa-miR-193b-5p; hsa-miR-194-5p; hsa-miR-27b-3p; hsa-miR-30d-5p; hsa-miR-95-3p
Diseases (MNDR)	Sporadic breast cancer	over-represented	0.0010747	0.0023153	0.0023153	0.0520141	2	hsa-miR-125b-5p; hsa-miR-34a-5p
Diseases (MNDR)	Tonsil cancer	over-represented	0.001137	0.0024344	0.0024344	1.28549	6	hsa-miR-125b-5p; hsa-miR-128-3p; hsa-miR-192-5p; hsa-miR-30d-5p; hsa-miR-34a-5p; hsa-miR-95-3p
Diseases (MNDR)	Familial ovarian cancer	over-represented	0.0013877	0.0029087	0.0029087	3.75987	10	hsa-miR-122-5p; hsa-miR-128-3p; hsa-miR-148a-3p; hsa-miR-152-3p; hsa-miR-192-5p; hsa-miR-193a-5p; hsa-miR-193b-5p; hsa-miR-30d-5p; hsa-miR-483-5p; hsa-miR-95-3p
Diseases (MNDR)	Gallbladder cancer	over-represented	0.0014267	0.0029549	0.0029549	0.0594447	2	hsa-miR-125b-5p; hsa-miR-34a-5p
Diseases (MNDR)	Breast cancer her3+ negative	over-represented	0.0017589	0.0035793	0.0035793	3.87133	10	hsa-miR-122-5p; hsa-miR-125b-5p; hsa-miR-128-3p; hsa-miR-146b-3p; hsa-miR-152-3p; hsa-miR-193a-5p; hsa-miR-193b-5p; hsa-miR-28-3p; hsa-miR-483-5p; hsa-miR-885-3p
Diseases (MNDR)	Uterine cancer	over-represented	0.0021991	0.0043607	0.0043607	0.980837	5	hsa-miR-122-5p; hsa-miR-128-3p; hsa-miR-148a-3p; hsa-miR-192-5p; hsa-miR-34a-5p
Diseases (MNDR)	Ocular cancer	over-represented	0.0033036	0.00637	0.00637	0.089167	2	hsa-miR-125b-5p; hsa-miR-34a-5p
Diseases (MNDR)	Esophageal cancer	over-represented	0.0038809	0.007361	0.007361	6.82127	13	hsa-miR-122-5p; hsa-miR-125b-5p; hsa-miR-128-3p; hsa-miR-148a-3p; hsa-miR-152-3p; hsa-miR-192-5p; hsa-miR-193a-5p; hsa-miR-194-5p; hsa-miR-27b-3p; hsa-miR-28-3p; hsa-miR-30d-5p; hsa-miR-95-3p; hsa-miR-885-3p
Diseases (MNDR)	Adrenal cortex cancer	over-represented	0.004054	0.0076068	0.0076068	0.334376	3	hsa-miR-125b-5p; hsa-miR-148a-3p; hsa-miR-34a-5p
Diseases (MNDR)	Testicular cancer	over-represented	0.0051655	0.0091049	0.0091049	0.364099	3	hsa-miR-122-5p; hsa-miR-125b-5p; hsa-miR-34a-5p
Diseases (MNDR)	Salivary gland cancer	over-represented	0.0054694	0.0092887	0.0092887	0.371529	3	hsa-miR-125b-5p; hsa-miR-148a-3p; hsa-miR-34a-5p
Diseases (MNDR)	Hematologic cancer	over-represented	0.0061093	0.0100573	0.0100573	0.38639	3	hsa-miR-148a-3p; hsa-miR-152-3p; hsa-miR-34a-5p
Diseases (MNDR)	Brain cancer	over-represented	0.0091103	0.0134156	0.0134156	0.445835	3	hsa-miR-125b-5p; hsa-miR-148a-3p; hsa-miR-152-3p
Diseases (MNDR)	Germ cell cancer	over-represented	0.0101009	0.0147191	0.0147191	0.156042	2	hsa-miR-125b-5p; hsa-miR-34a-5p
Diseases (MNDR)	Gastric cancer	over-represented	0.0111548	0.0160537	0.0160537	10.7743	16	hsa-miR-122-5p; hsa-miR-125b-5p; hsa-miR-146b-3p; hsa-miR-148a-3p; hsa-miR-152-3p; hsa-miR-192-5p; hsa-miR-193a-5p; hsa-miR-193b-5p; hsa-miR-194-5p; hsa-miR-27b-3p; hsa-miR-28-3p; hsa-miR-30d-5p; hsa-miR-34a-5p; hsa-miR-483-5p; hsa-miR-95-3p; hsa-miR-885-3p
Diseases (MNDR)	Triple negative breast cancer	over-represented	0.0152907	0.0206041	0.0206041	0.193195	2	hsa-miR-27b-3p; hsa-miR-34a-5p
Diseases (MNDR)	Endometrial cancer	over-represented	0.0161582	0.0216476	0.0216476	0.549863	3	hsa-miR-125b-5p; hsa-miR-152-3p; hsa-miR-194-5p
Diseases (MNDR)	Non-small cell lung cancer	over-represented	0.0186097	0.024695	0.024695	0.579585	3	hsa-miR-128-3p; hsa-miR-34a-5p; hsa-miR-483-5p
Diseases (MNDR)	Colon cancer	over-represented	0.0327542	0.0397608	0.0397608	11.7552	16	hsa-miR-122-5p; hsa-miR-125b-5p; hsa-miR-128-3p; hsa-miR-146b-3p; hsa-miR-148a-3p; hsa-miR-152-3p; hsa-miR-192-5p; hsa-miR-193a-5p; hsa-miR-194-5p; hsa-miR-27b-3p; hsa-miR-28-3p; hsa-miR-30d-5p; hsa-miR-34a-5p; hsa-miR-378c; hsa-miR-483-5p; hsa-miR-95-3p
Diseases (MNDR)	Stomach cancer	over-represented	0.0385148	0.0457199	0.0457199	9.70434	14	hsa-miR-125b-5p; hsa-miR-146b-3p; hsa-miR-148a-3p; hsa-miR-152-3p; hsa-miR-193a-5p; hsa-miR-193b-5p; hsa-miR-194-5p; hsa-miR-27b-3p; hsa-miR-28-3p; hsa-miR-30d-5p; hsa-miR-34a-5p; hsa-miR-483-5p; hsa-miR-95-3p; hsa-miR-885-3p

## Sheet: ATable9
miEAA - miRNA Enrichment and Annotation -- Analysis results
Category	Subcategory	Enrichment	P-value	P-adjusted	Q-value	Expected	Observed	miRNAs/precursors
Diseases (MNDR)	Breast cancer	over-represented	3.87e-12	1.58e-10	1.58e-10	14.9081	36	hsa-miR-130b-3p; hsa-miR-145-5p; hsa-miR-15b-3p; hsa-miR-15b-5p; hsa-miR-17-5p; hsa-miR-18a-5p; hsa-miR-1908-5p; hsa-miR-195-5p; hsa-miR-204-5p; hsa-miR-205-5p; hsa-miR-222-3p; hsa-miR-30b-5p; hsa-miR-30c-5p; hsa-miR-335-3p; hsa-miR-339-3p; hsa-miR-339-5p; hsa-miR-33a-5p; hsa-miR-345-5p; hsa-miR-421; hsa-miR-425-3p; hsa-miR-450b-5p; hsa-miR-454-5p; hsa-miR-483-3p; hsa-miR-491-5p; hsa-miR-505-5p; …
Diseases (MNDR)	Kidney chromophobe cancer	over-represented	4.50e-10	1.11e-8	1.11e-8	5.9914	23	hsa-miR-1306-5p; hsa-miR-130b-3p; hsa-miR-145-5p; hsa-miR-15b-3p; hsa-miR-15b-5p; hsa-miR-18a-5p; hsa-miR-195-5p; hsa-miR-204-5p; hsa-miR-222-3p; hsa-miR-30b-5p; hsa-miR-30c-5p; hsa-miR-335-3p; hsa-miR-425-3p; hsa-miR-450b-5p; hsa-miR-483-3p; hsa-miR-505-5p; hsa-miR-664a-3p; hsa-miR-365a-3p; hsa-miR-365b-3p; hsa-miR-766-3p; hsa-let-7b-3p; hsa-miR-133a-3p; hsa-miR-7-1-3p
Diseases (MNDR)	Lung cancer	over-represented	5.64e-10	1.30e-8	1.30e-8	10.2933	29	hsa-miR-130b-3p; hsa-miR-145-5p; hsa-miR-15b-5p; hsa-miR-17-5p; hsa-miR-18a-5p; hsa-miR-195-5p; hsa-miR-204-5p; hsa-miR-205-5p; hsa-miR-222-3p; hsa-miR-30b-5p; hsa-miR-30c-5p; hsa-miR-339-3p; hsa-miR-339-5p; hsa-miR-33a-5p; hsa-miR-345-5p; hsa-miR-421; hsa-miR-425-3p; hsa-miR-450b-5p; hsa-miR-483-3p; hsa-miR-491-5p; hsa-miR-532-3p; hsa-miR-628-5p; hsa-miR-664a-3p; hsa-miR-365a-3p; hsa-miR-766-3p;…
Diseases (MNDR)	Progesterone-receptor positive breast cancer	over-represented	7.14e-10	1.55e-8	1.55e-8	10.3872	29	hsa-miR-130b-3p; hsa-miR-145-5p; hsa-miR-15b-3p; hsa-miR-15b-5p; hsa-miR-17-5p; hsa-miR-18a-5p; hsa-miR-1908-5p; hsa-miR-195-5p; hsa-miR-204-5p; hsa-miR-205-5p; hsa-miR-222-3p; hsa-miR-30b-5p; hsa-miR-30c-5p; hsa-miR-335-3p; hsa-miR-339-3p; hsa-miR-339-5p; hsa-miR-33a-5p; hsa-miR-345-5p; hsa-miR-421; hsa-miR-425-3p; hsa-miR-454-5p; hsa-miR-483-3p; hsa-miR-505-5p; hsa-miR-532-3p; hsa-miR-664a-3p; …
Diseases (MNDR)	Prostate cancer	over-represented	8.36e-10	1.66e-8	1.66e-8	8.88541	27	hsa-miR-130b-3p; hsa-miR-145-5p; hsa-miR-15b-5p; hsa-miR-17-5p; hsa-miR-18a-5p; hsa-miR-195-5p; hsa-miR-204-5p; hsa-miR-205-5p; hsa-miR-222-3p; hsa-miR-30b-5p; hsa-miR-30c-5p; hsa-miR-335-3p; hsa-miR-33a-5p; hsa-miR-345-5p; hsa-miR-421; hsa-miR-425-3p; hsa-miR-450b-5p; hsa-miR-483-3p; hsa-miR-491-5p; hsa-miR-505-5p; hsa-miR-532-3p; hsa-miR-628-5p; hsa-miR-365a-3p; hsa-miR-766-3p; hsa-let-7b-3p; h…
Diseases (MNDR)	Her2-receptor positive breast cancer	over-represented	1.07e-9	2.06e-8	2.06e-8	9.7458	28	hsa-miR-130b-3p; hsa-miR-145-5p; hsa-miR-15b-3p; hsa-miR-15b-5p; hsa-miR-17-5p; hsa-miR-18a-5p; hsa-miR-1908-5p; hsa-miR-195-5p; hsa-miR-204-5p; hsa-miR-205-5p; hsa-miR-222-3p; hsa-miR-30b-5p; hsa-miR-30c-5p; hsa-miR-335-3p; hsa-miR-339-3p; hsa-miR-339-5p; hsa-miR-33a-5p; hsa-miR-345-5p; hsa-miR-425-3p; hsa-miR-454-5p; hsa-miR-483-3p; hsa-miR-505-5p; hsa-miR-532-3p; hsa-miR-664a-3p; hsa-miR-766-3…
Diseases (MNDR)	Colorectal cancer	over-represented	1.44e-8	2.08e-7	2.08e-7	17.7708	35	hsa-miR-130b-3p; hsa-miR-145-5p; hsa-miR-15b-5p; hsa-miR-17-5p; hsa-miR-18a-5p; hsa-miR-1908-5p; hsa-miR-195-5p; hsa-miR-204-5p; hsa-miR-205-5p; hsa-miR-222-3p; hsa-miR-30b-5p; hsa-miR-30c-5p; hsa-miR-335-3p; hsa-miR-339-3p; hsa-miR-339-5p; hsa-miR-33a-5p; hsa-miR-345-5p; hsa-miR-3679-5p; hsa-miR-421; hsa-miR-425-3p; hsa-miR-450b-5p; hsa-miR-454-5p; hsa-miR-483-3p; hsa-miR-491-5p; hsa-miR-532-3p;…
Diseases (MNDR)	Head and neck cancer	over-represented	2.12e-8	2.94e-7	2.94e-7	3.23817	16	hsa-miR-130b-3p; hsa-miR-145-5p; hsa-miR-17-5p; hsa-miR-18a-5p; hsa-miR-195-5p; hsa-miR-204-5p; hsa-miR-205-5p; hsa-miR-222-3p; hsa-miR-30b-5p; hsa-miR-30c-5p; hsa-miR-339-5p; hsa-miR-33a-5p; hsa-miR-421; hsa-miR-491-5p; hsa-miR-766-3p; hsa-miR-133a-3p
Diseases (MNDR)	Estrogen-receptor positive breast cancer	over-represented	3.49e-8	4.57e-7	4.57e-7	10.4028	27	hsa-miR-130b-3p; hsa-miR-145-5p; hsa-miR-15b-3p; hsa-miR-15b-5p; hsa-miR-17-5p; hsa-miR-18a-5p; hsa-miR-1908-5p; hsa-miR-195-5p; hsa-miR-204-5p; hsa-miR-205-5p; hsa-miR-222-3p; hsa-miR-30b-5p; hsa-miR-30c-5p; hsa-miR-335-3p; hsa-miR-339-3p; hsa-miR-339-5p; hsa-miR-33a-5p; hsa-miR-345-5p; hsa-miR-421; hsa-miR-425-3p; hsa-miR-454-5p; hsa-miR-483-3p; hsa-miR-505-5p; hsa-miR-532-3p; hsa-miR-766-3p; h…
Diseases (MNDR)	Progesterone-receptor negative breast cancer	over-represented	4.63e-8	5.35e-7	5.35e-7	9.73015	26	hsa-miR-130b-3p; hsa-miR-145-5p; hsa-miR-15b-3p; hsa-miR-15b-5p; hsa-miR-17-5p; hsa-miR-18a-5p; hsa-miR-1908-5p; hsa-miR-195-5p; hsa-miR-204-5p; hsa-miR-205-5p; hsa-miR-222-3p; hsa-miR-30b-5p; hsa-miR-30c-5p; hsa-miR-335-3p; hsa-miR-339-3p; hsa-miR-339-5p; hsa-miR-33a-5p; hsa-miR-421; hsa-miR-425-3p; hsa-miR-454-5p; hsa-miR-483-3p; hsa-miR-664a-3p; hsa-miR-766-3p; hsa-let-7b-3p; hsa-miR-133a-3p; …
Diseases (MNDR)	Nasopharyngeal cancer	over-represented	7.49e-8	8.11e-7	8.11e-7	9.16699	25	hsa-miR-145-5p; hsa-miR-15b-3p; hsa-miR-15b-5p; hsa-miR-17-5p; hsa-miR-18a-5p; hsa-miR-1908-5p; hsa-miR-195-5p; hsa-miR-204-5p; hsa-miR-205-5p; hsa-miR-222-3p; hsa-miR-30b-5p; hsa-miR-30c-5p; hsa-miR-339-3p; hsa-miR-339-5p; hsa-miR-421; hsa-miR-450b-5p; hsa-miR-454-5p; hsa-miR-483-3p; hsa-miR-491-5p; hsa-miR-505-5p; hsa-miR-532-3p; hsa-miR-628-5p; hsa-miR-365a-3p; hsa-miR-766-3p; hsa-miR-7-1-3p
Diseases (MNDR)	Estrogen-receptor negative breast cancer	over-represented	1.53e-7	1.55e-6	1.55e-6	9.47986	25	hsa-miR-130b-3p; hsa-miR-145-5p; hsa-miR-15b-3p; hsa-miR-15b-5p; hsa-miR-17-5p; hsa-miR-18a-5p; hsa-miR-1908-5p; hsa-miR-195-5p; hsa-miR-204-5p; hsa-miR-205-5p; hsa-miR-222-3p; hsa-miR-30b-5p; hsa-miR-30c-5p; hsa-miR-335-3p; hsa-miR-339-3p; hsa-miR-339-5p; hsa-miR-33a-5p; hsa-miR-421; hsa-miR-425-3p; hsa-miR-454-5p; hsa-miR-483-3p; hsa-miR-532-3p; hsa-miR-766-3p; hsa-let-7b-3p; hsa-miR-7-1-3p
Diseases (MNDR)	Small cell lung cancer	over-represented	1.72e-7	1.72e-6	1.72e-6	4.27063	17	hsa-miR-130b-3p; hsa-miR-145-5p; hsa-miR-15b-3p; hsa-miR-15b-5p; hsa-miR-17-5p; hsa-miR-18a-5p; hsa-miR-195-5p; hsa-miR-222-3p; hsa-miR-30b-5p; hsa-miR-30c-5p; hsa-miR-335-3p; hsa-miR-345-5p; hsa-miR-421; hsa-miR-491-5p; hsa-miR-505-5p; hsa-miR-628-5p; hsa-miR-7-1-3p
Diseases (MNDR)	Thyroid cancer	over-represented	1.90e-7	1.85e-6	1.85e-6	3.26946	15	hsa-miR-145-5p; hsa-miR-15b-3p; hsa-miR-15b-5p; hsa-miR-17-5p; hsa-miR-18a-5p; hsa-miR-195-5p; hsa-miR-204-5p; hsa-miR-205-5p; hsa-miR-222-3p; hsa-miR-335-3p; hsa-miR-339-5p; hsa-miR-345-5p; hsa-miR-421; hsa-miR-133a-3p; hsa-miR-7-1-3p
Diseases (MNDR)	Bladder cancer	over-represented	2.29e-7	2.17e-6	2.17e-6	1.9867	12	hsa-miR-130b-3p; hsa-miR-145-5p; hsa-miR-17-5p; hsa-miR-18a-5p; hsa-miR-195-5p; hsa-miR-204-5p; hsa-miR-205-5p; hsa-miR-30c-5p; hsa-miR-483-3p; hsa-miR-532-3p; hsa-miR-365a-3p; hsa-miR-133a-3p
Diseases (MNDR)	Pancreatic cancer	over-represented	9.43e-7	7.78e-6	7.78e-6	19.1005	34	hsa-miR-130b-3p; hsa-miR-145-5p; hsa-miR-15b-3p; hsa-miR-15b-5p; hsa-miR-17-5p; hsa-miR-18a-5p; hsa-miR-1908-5p; hsa-miR-195-5p; hsa-miR-204-5p; hsa-miR-205-5p; hsa-miR-222-3p; hsa-miR-30b-5p; hsa-miR-30c-5p; hsa-miR-335-3p; hsa-miR-339-5p; hsa-miR-33a-5p; hsa-miR-345-5p; hsa-miR-3679-5p; hsa-miR-421; hsa-miR-425-3p; hsa-miR-450b-5p; hsa-miR-454-5p; hsa-miR-483-3p; hsa-miR-491-5p; hsa-miR-505-5p;…
Diseases (MNDR)	Breast cancer luminal	over-represented	1.56e-6	1.21e-5	1.21e-5	3.83262	15	hsa-miR-130b-3p; hsa-miR-145-5p; hsa-miR-15b-5p; hsa-miR-17-5p; hsa-miR-18a-5p; hsa-miR-204-5p; hsa-miR-222-3p; hsa-miR-335-3p; hsa-miR-339-5p; hsa-miR-33a-5p; hsa-miR-345-5p; hsa-miR-421; hsa-miR-483-3p; hsa-let-7b-3p; hsa-miR-7-1-3p
Diseases (MNDR)	Uterine cancer	over-represented	2.93e-6	2.05e-5	2.05e-5	2.06492	11	hsa-miR-130b-3p; hsa-miR-145-5p; hsa-miR-18a-5p; hsa-miR-195-5p; hsa-miR-204-5p; hsa-miR-205-5p; hsa-miR-222-3p; hsa-miR-339-5p; hsa-miR-33a-5p; hsa-miR-345-5p; hsa-miR-7-1-3p
Diseases (MNDR)	Testicular germ cell cancer	over-represented	7.85e-6	3.93e-5	3.93e-5	1.84591	10	hsa-miR-130b-3p; hsa-miR-145-5p; hsa-miR-15b-3p; hsa-miR-195-5p; hsa-miR-335-3p; hsa-miR-483-3p; hsa-miR-628-5p; hsa-let-7b-3p; hsa-miR-133a-3p; hsa-miR-7-1-3p
Diseases (MNDR)	Hypopharynx cancer	over-represented	9.28e-6	4.20e-5	4.20e-5	0.79781	7	hsa-miR-145-5p; hsa-miR-15b-5p; hsa-miR-17-5p; hsa-miR-195-5p; hsa-miR-222-3p; hsa-miR-30b-5p; hsa-miR-133a-3p
Diseases (MNDR)	Endometrial cancer	over-represented	1.23e-5	5.12e-5	5.12e-5	1.15761	8	hsa-miR-130b-3p; hsa-miR-145-5p; hsa-miR-17-5p; hsa-miR-18a-5p; hsa-miR-195-5p; hsa-miR-205-5p; hsa-miR-222-3p; hsa-miR-30c-5p
Diseases (MNDR)	Ovarian cancer	over-represented	1.63e-5	6.39e-5	6.39e-5	5.22487	16	hsa-miR-130b-3p; hsa-miR-17-5p; hsa-miR-18a-5p; hsa-miR-1908-5p; hsa-miR-205-5p; hsa-miR-30b-5p; hsa-miR-30c-5p; hsa-miR-339-3p; hsa-miR-339-5p; hsa-miR-33a-5p; hsa-miR-345-5p; hsa-miR-421; hsa-miR-483-3p; hsa-miR-532-3p; hsa-miR-664a-3p; hsa-miR-766-3p
Diseases (MNDR)	Skin cancer	over-represented	1.76e-5	6.69e-5	6.69e-5	0.876027	7	hsa-miR-145-5p; hsa-miR-17-5p; hsa-miR-18a-5p; hsa-miR-195-5p; hsa-miR-205-5p; hsa-miR-222-3p; hsa-miR-133a-3p
Diseases (MNDR)	Urinary bladder cancer	over-represented	1.75e-5	6.69e-5	6.69e-5	2.01799	10	hsa-miR-130b-3p; hsa-miR-145-5p; hsa-miR-15b-5p; hsa-miR-195-5p; hsa-miR-204-5p; hsa-miR-222-3p; hsa-miR-30b-5p; hsa-miR-483-3p; hsa-miR-532-3p; hsa-miR-365a-3p
Diseases (MNDR)	Non-small cell lung cancer	over-represented	1.82e-5	6.91e-5	6.91e-5	1.22018	8	hsa-miR-130b-3p; hsa-miR-145-5p; hsa-miR-17-5p; hsa-miR-18a-5p; hsa-miR-205-5p; hsa-miR-222-3p; hsa-miR-30b-5p; hsa-miR-30c-5p
Diseases (MNDR)	Uterus cancer	over-represented	2.15e-5	8.02e-5	8.02e-5	2.06492	10	hsa-miR-130b-3p; hsa-miR-145-5p; hsa-miR-18a-5p; hsa-miR-195-5p; hsa-miR-204-5p; hsa-miR-205-5p; hsa-miR-222-3p; hsa-miR-339-5p; hsa-miR-33a-5p; hsa-miR-345-5p
Diseases (MNDR)	Breast cancer her3+ negative	over-represented	2.44e-5	8.92e-5	8.92e-5	8.15018	20	hsa-miR-130b-3p; hsa-miR-145-5p; hsa-miR-15b-3p; hsa-miR-15b-5p; hsa-miR-17-5p; hsa-miR-18a-5p; hsa-miR-1908-5p; hsa-miR-195-5p; hsa-miR-204-5p; hsa-miR-205-5p; hsa-miR-222-3p; hsa-miR-30c-5p; hsa-miR-335-3p; hsa-miR-339-3p; hsa-miR-339-5p; hsa-miR-425-3p; hsa-miR-454-5p; hsa-miR-483-3p; hsa-miR-766-3p; hsa-let-7b-3p
Diseases (MNDR)	Adrenal cortex cancer	over-represented	5.17e-5	1.80e-4	1.80e-4	0.70395	6	hsa-miR-145-5p; hsa-miR-17-5p; hsa-miR-18a-5p; hsa-miR-195-5p; hsa-miR-205-5p; hsa-miR-222-3p
Diseases (MNDR)	Familial ovarian cancer	over-represented	6.32e-5	2.15e-4	2.15e-4	7.91553	19	hsa-miR-15b-3p; hsa-miR-15b-5p; hsa-miR-17-5p; hsa-miR-18a-5p; hsa-miR-195-5p; hsa-miR-30c-5p; hsa-miR-335-3p; hsa-miR-339-3p; hsa-miR-339-5p; hsa-miR-33a-5p; hsa-miR-421; hsa-miR-425-3p; hsa-miR-454-5p; hsa-miR-491-5p; hsa-miR-505-5p; hsa-miR-532-3p; hsa-miR-628-5p; hsa-let-7b-3p; hsa-miR-7-1-3p
Diseases (MNDR)	Germ cell and embryonal cancer	over-represented	9.52e-5	2.51e-4	2.51e-4	0.782167	6	hsa-miR-145-5p; hsa-miR-15b-5p; hsa-miR-17-5p; hsa-miR-222-3p; hsa-miR-30b-5p; hsa-miR-133a-3p
Diseases (MNDR)	Salivary gland cancer	over-represented	9.52e-5	2.51e-4	2.51e-4	0.782167	6	hsa-miR-145-5p; hsa-miR-17-5p; hsa-miR-18a-5p; hsa-miR-195-5p; hsa-miR-205-5p; hsa-miR-222-3p
Diseases (MNDR)	Gastric cancer	over-represented	1.22e-4	2.97e-4	2.97e-4	22.6828	34	hsa-miR-1306-5p; hsa-miR-130b-3p; hsa-miR-145-5p; hsa-miR-15b-3p; hsa-miR-15b-5p; hsa-miR-17-5p; hsa-miR-18a-5p; hsa-miR-1908-5p; hsa-miR-195-5p; hsa-miR-204-5p; hsa-miR-205-5p; hsa-miR-222-3p; hsa-miR-30b-5p; hsa-miR-30c-5p; hsa-miR-335-3p; hsa-miR-339-5p; hsa-miR-33a-5p; hsa-miR-345-5p; hsa-miR-3679-5p; hsa-miR-421; hsa-miR-425-3p; hsa-miR-450b-5p; hsa-miR-454-5p; hsa-miR-483-3p; hsa-miR-491-5p…
Diseases (MNDR)	Large cell neuroendocrine cancer	over-represented	1.30e-4	3.16e-4	3.16e-4	2.04928	9	hsa-miR-130b-3p; hsa-miR-145-5p; hsa-miR-17-5p; hsa-miR-18a-5p; hsa-miR-195-5p; hsa-miR-30b-5p; hsa-miR-30c-5p; hsa-miR-421; hsa-miR-7-1-3p
Diseases (MNDR)	Esophageal cancer	over-represented	1.54e-4	3.64e-4	3.64e-4	14.3606	26	hsa-miR-1306-5p; hsa-miR-130b-3p; hsa-miR-145-5p; hsa-miR-15b-3p; hsa-miR-15b-5p; hsa-miR-17-5p; hsa-miR-18a-5p; hsa-miR-1908-5p; hsa-miR-195-5p; hsa-miR-204-5p; hsa-miR-205-5p; hsa-miR-222-3p; hsa-miR-30b-5p; hsa-miR-30c-5p; hsa-miR-335-3p; hsa-miR-339-5p; hsa-miR-33a-5p; hsa-miR-3679-5p; hsa-miR-425-3p; hsa-miR-483-3p; hsa-miR-505-5p; hsa-miR-532-3p; hsa-miR-365a-3p; hsa-miR-766-3p; hsa-let-7b-…
Diseases (MNDR)	Tongue cancer	over-represented	1.64e-4	3.81e-4	3.81e-4	0.860383	6	hsa-miR-145-5p; hsa-miR-17-5p; hsa-miR-18a-5p; hsa-miR-205-5p; hsa-miR-222-3p; hsa-miR-133a-3p
Diseases (MNDR)	Basal-like breast cancer	over-represented	6.15e-4	0.0012497	0.0012497	3.06609	10	hsa-miR-130b-3p; hsa-miR-145-5p; hsa-miR-15b-5p; hsa-miR-17-5p; hsa-miR-18a-5p; hsa-miR-195-5p; hsa-miR-33a-5p; hsa-miR-483-3p; hsa-miR-532-3p; hsa-miR-365a-3p
Diseases (MNDR)	Testicular cancer	over-represented	8.34e-4	0.0016055	0.0016055	0.766523	5	hsa-miR-145-5p; hsa-miR-17-5p; hsa-miR-18a-5p; hsa-miR-222-3p; hsa-miR-133a-3p
Diseases (MNDR)	Colon cancer	over-represented	0.0012088	0.002148	0.002148	24.7478	34	hsa-miR-1306-5p; hsa-miR-130b-3p; hsa-miR-145-5p; hsa-miR-15b-3p; hsa-miR-15b-5p; hsa-miR-17-5p; hsa-miR-18a-5p; hsa-miR-1908-5p; hsa-miR-195-5p; hsa-miR-204-5p; hsa-miR-205-5p; hsa-miR-222-3p; hsa-miR-30b-5p; hsa-miR-30c-5p; hsa-miR-335-3p; hsa-miR-339-5p; hsa-miR-33a-5p; hsa-miR-345-5p; hsa-miR-3679-5p; hsa-miR-421; hsa-miR-425-3p; hsa-miR-450b-5p; hsa-miR-454-5p; hsa-miR-483-3p; hsa-miR-491-5p…
Diseases (MNDR)	Rectum cancer	over-represented	0.0014202	0.002498	0.002498	0.860383	5	hsa-miR-17-5p; hsa-miR-18a-5p; hsa-miR-195-5p; hsa-miR-205-5p; hsa-miR-222-3p
Diseases (MNDR)	Brain cancer	over-represented	0.0021054	0.0036359	0.0036359	0.9386	5	hsa-miR-145-5p; hsa-miR-17-5p; hsa-miR-18a-5p; hsa-miR-195-5p; hsa-miR-205-5p
Diseases (MNDR)	Cervical cancer	over-represented	0.0025841	0.0043891	0.0043891	0.594447	4	hsa-miR-145-5p; hsa-miR-17-5p; hsa-miR-205-5p; hsa-miR-491-5p
Diseases (MNDR)	Kidney cancer	over-represented	0.0034418	0.0056655	0.0056655	1.5174	6	hsa-miR-145-5p; hsa-miR-17-5p; hsa-miR-18a-5p; hsa-miR-195-5p; hsa-miR-204-5p; hsa-miR-222-3p
Diseases (MNDR)	Gastrointestinal system cancer	over-represented	0.0052203	0.0083548	0.0083548	0.719593	4	hsa-miR-145-5p; hsa-miR-17-5p; hsa-miR-18a-5p; hsa-miR-205-5p
Diseases (MNDR)	Triple negative breast cancer	over-represented	0.0071879	0.0108761	0.0108761	0.406727	3	hsa-miR-18a-5p; hsa-miR-195-5p; hsa-miR-205-5p
Diseases (MNDR)	Adrenocortical cancer	over-represented	0.0099642	0.0146608	0.0146608	1.34533	5	hsa-miR-15b-5p; hsa-miR-195-5p; hsa-miR-33a-5p; hsa-miR-483-3p; hsa-miR-766-3p
Diseases (MNDR)	Ocular cancer	over-represented	0.0142656	0.0205105	0.0205105	0.18772	2	hsa-miR-17-5p; hsa-miR-222-3p
Diseases (MNDR)	Tonsil cancer	over-represented	0.015947	0.0212524	0.0212524	2.7063	7	hsa-miR-17-5p; hsa-miR-18a-5p; hsa-miR-204-5p; hsa-miR-30b-5p; hsa-miR-30c-5p; hsa-miR-339-5p; hsa-miR-483-3p
Diseases (MNDR)	Cancer	over-represented	0.0251214	0.0331602	0.0331602	16.4099	23	hsa-miR-145-5p; hsa-miR-15b-3p; hsa-miR-204-5p; hsa-miR-30c-5p; hsa-miR-335-3p; hsa-miR-339-3p; hsa-miR-33a-5p; hsa-miR-345-5p; hsa-miR-421; hsa-miR-425-3p; hsa-miR-450b-5p; hsa-miR-454-5p; hsa-miR-483-3p; hsa-miR-491-5p; hsa-miR-505-5p; hsa-miR-532-3p; hsa-miR-628-5p; hsa-miR-664a-3p; hsa-miR-365a-3p; hsa-miR-548z; hsa-let-7b-3p; hsa-let-7f-2-3p; hsa-miR-7-1-3p
Diseases (MNDR)	Small intestine cancer	over-represented	0.0284111	0.0373603	0.0373603	0.672663	3	hsa-miR-17-5p; hsa-miR-18a-5p; hsa-miR-664a-3p
Diseases (MNDR)	Ovarian epithelial cancer	over-represented	0.0338419	0.0425634	0.0425634	0.719593	3	hsa-miR-130b-3p; hsa-miR-145-5p; hsa-miR-205-5p

[truncated: 5 more sheets: ATable10, ATable11, ATable12, ATable13, ATable14]
